# Supplementary material
Source: MDPI journal article supplement (https://www.mdpi.com/2079-9276/12/5/59)
Supplement: s1 [file s1]

Archive with 3 entries (3 files):
- Supplementary Material S1.pdf
- Supplementary Material S2.xls
- Supplementary Material S3.xls
