# Supplementary material
Source: MDPI journal article supplement (https://www.mdpi.com/2079-9276/12/5/59)

Supplementary Material S1. High-resolution geodiversity maps (radius of 5 kilometres was used and cell size is set to 1 kilometre).

**a**  
Geomorphodiversity

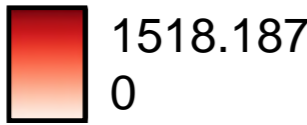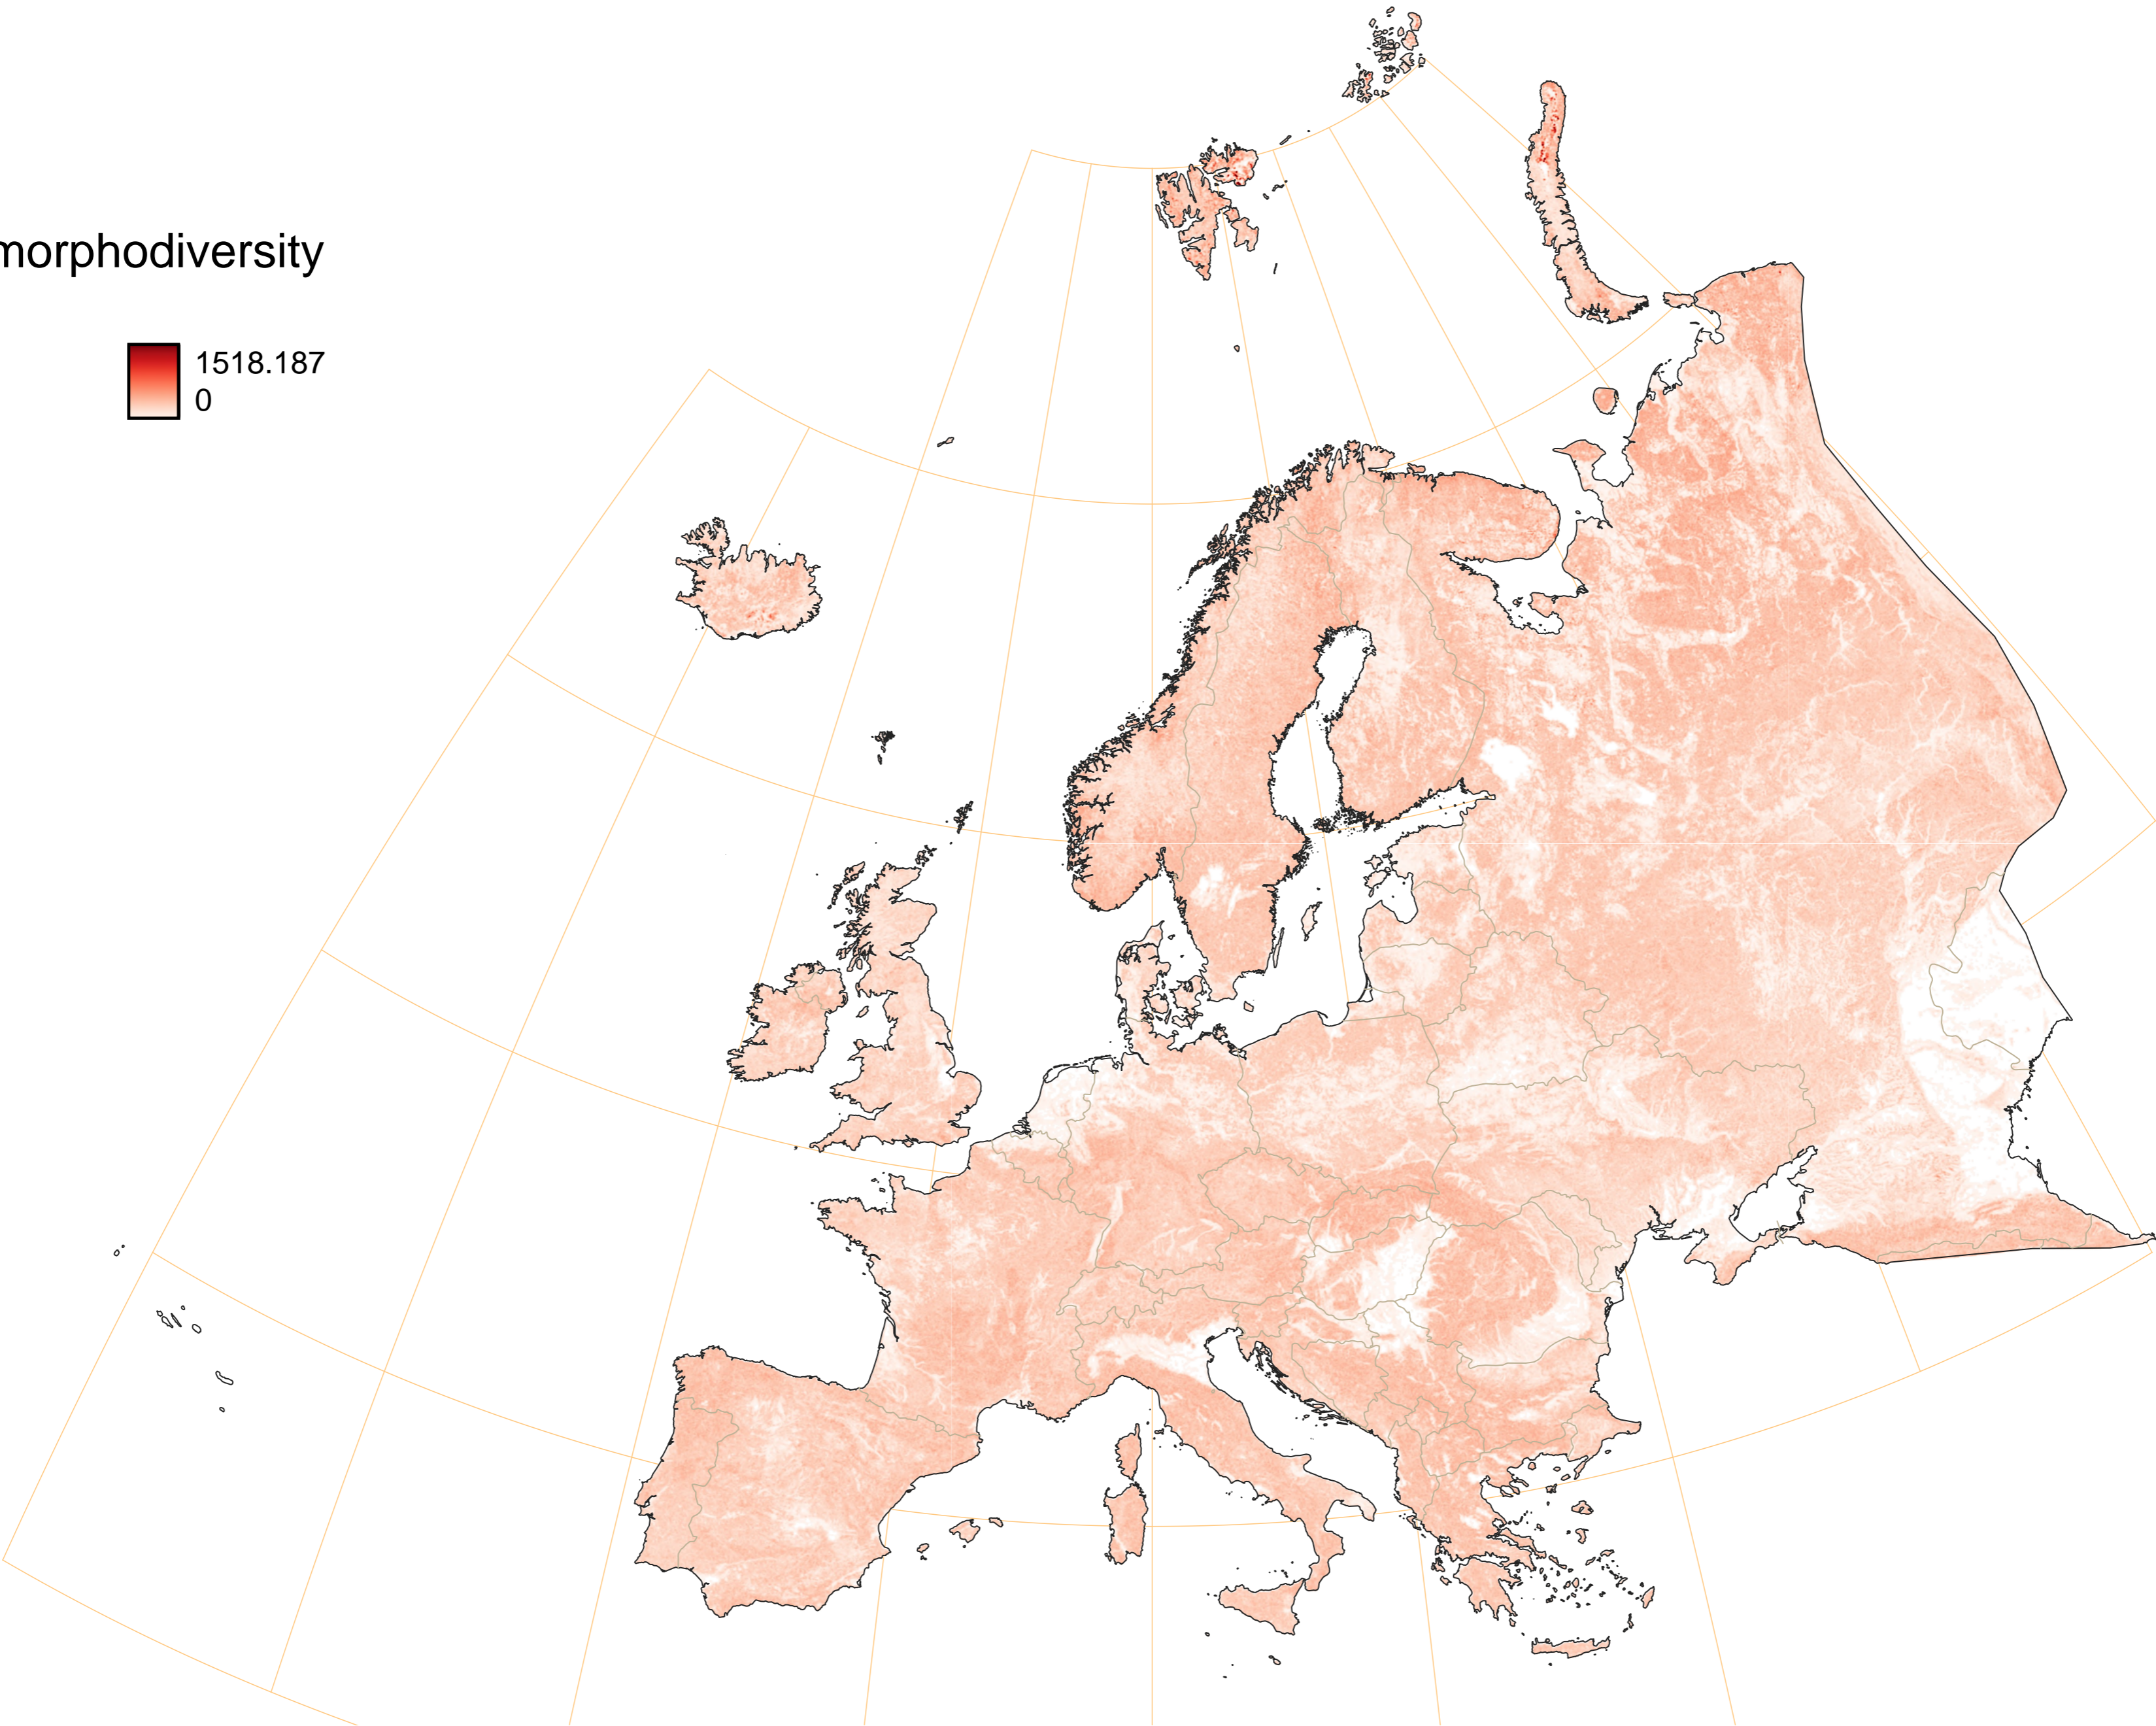

**b**

Hydrodiversity

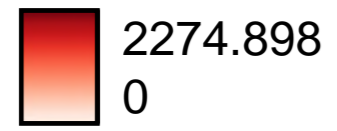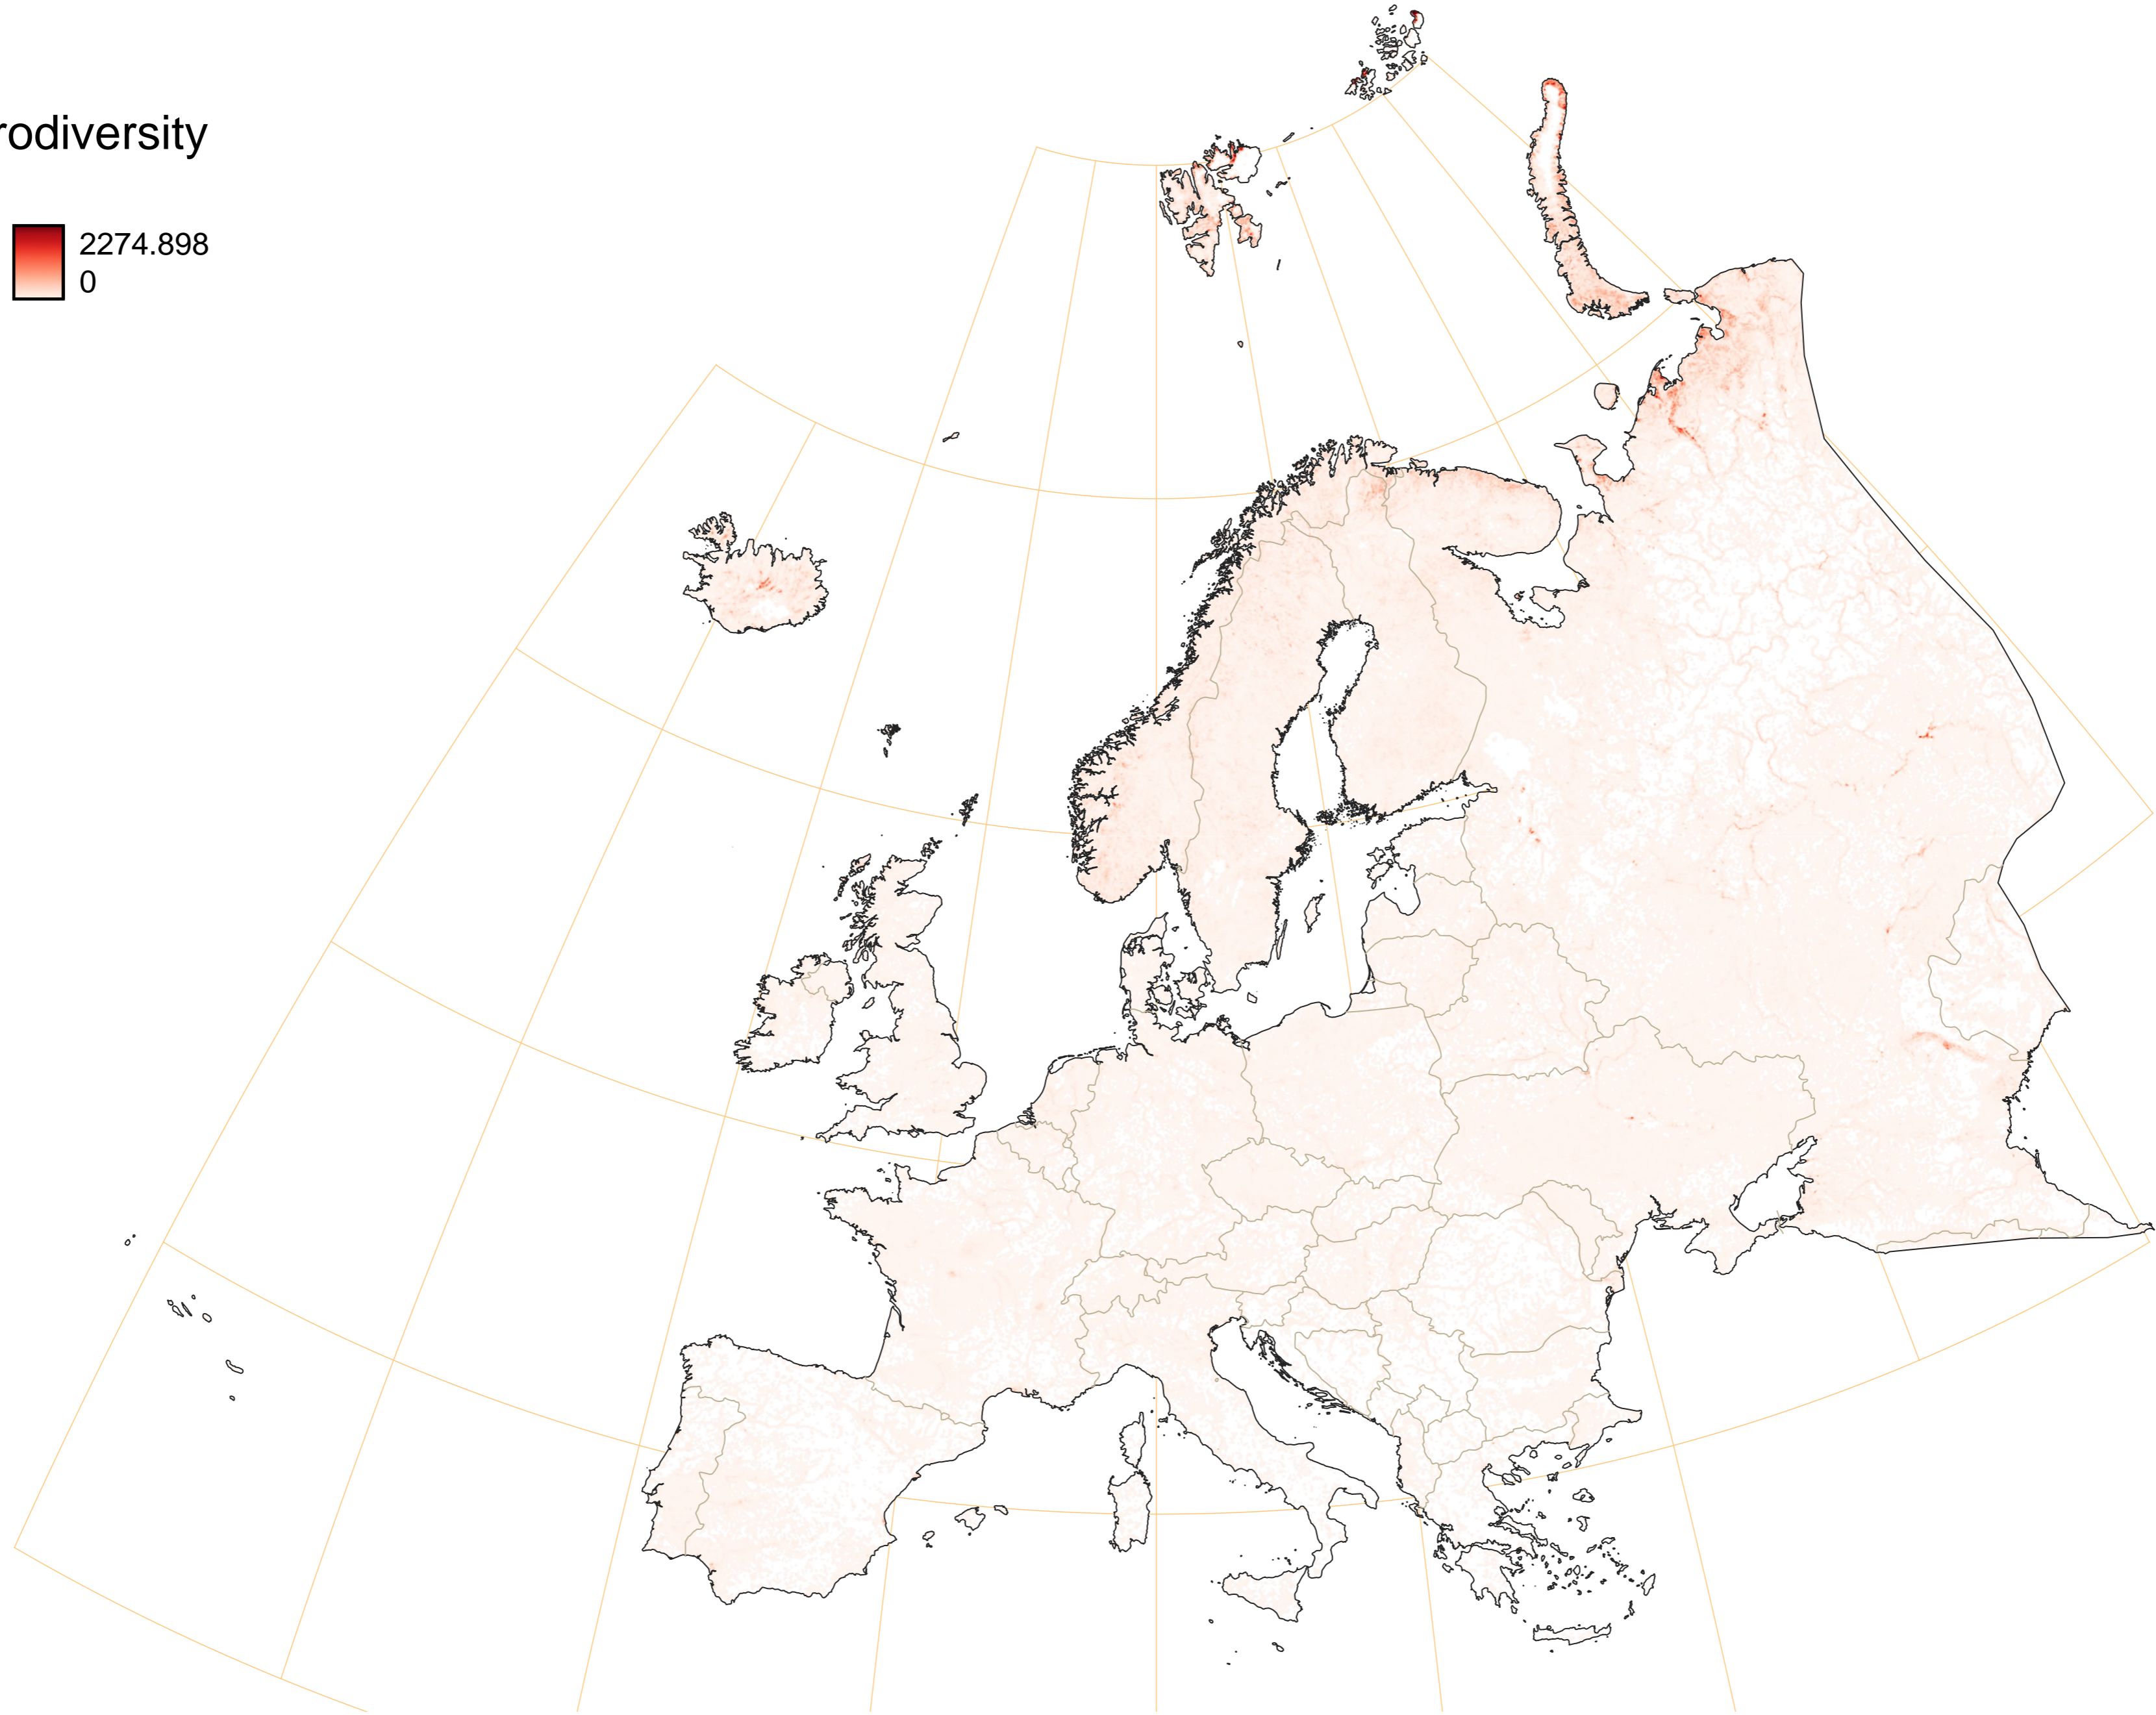

**C**

Hydrogeological  
diversity

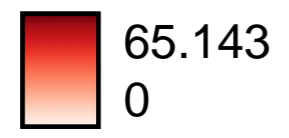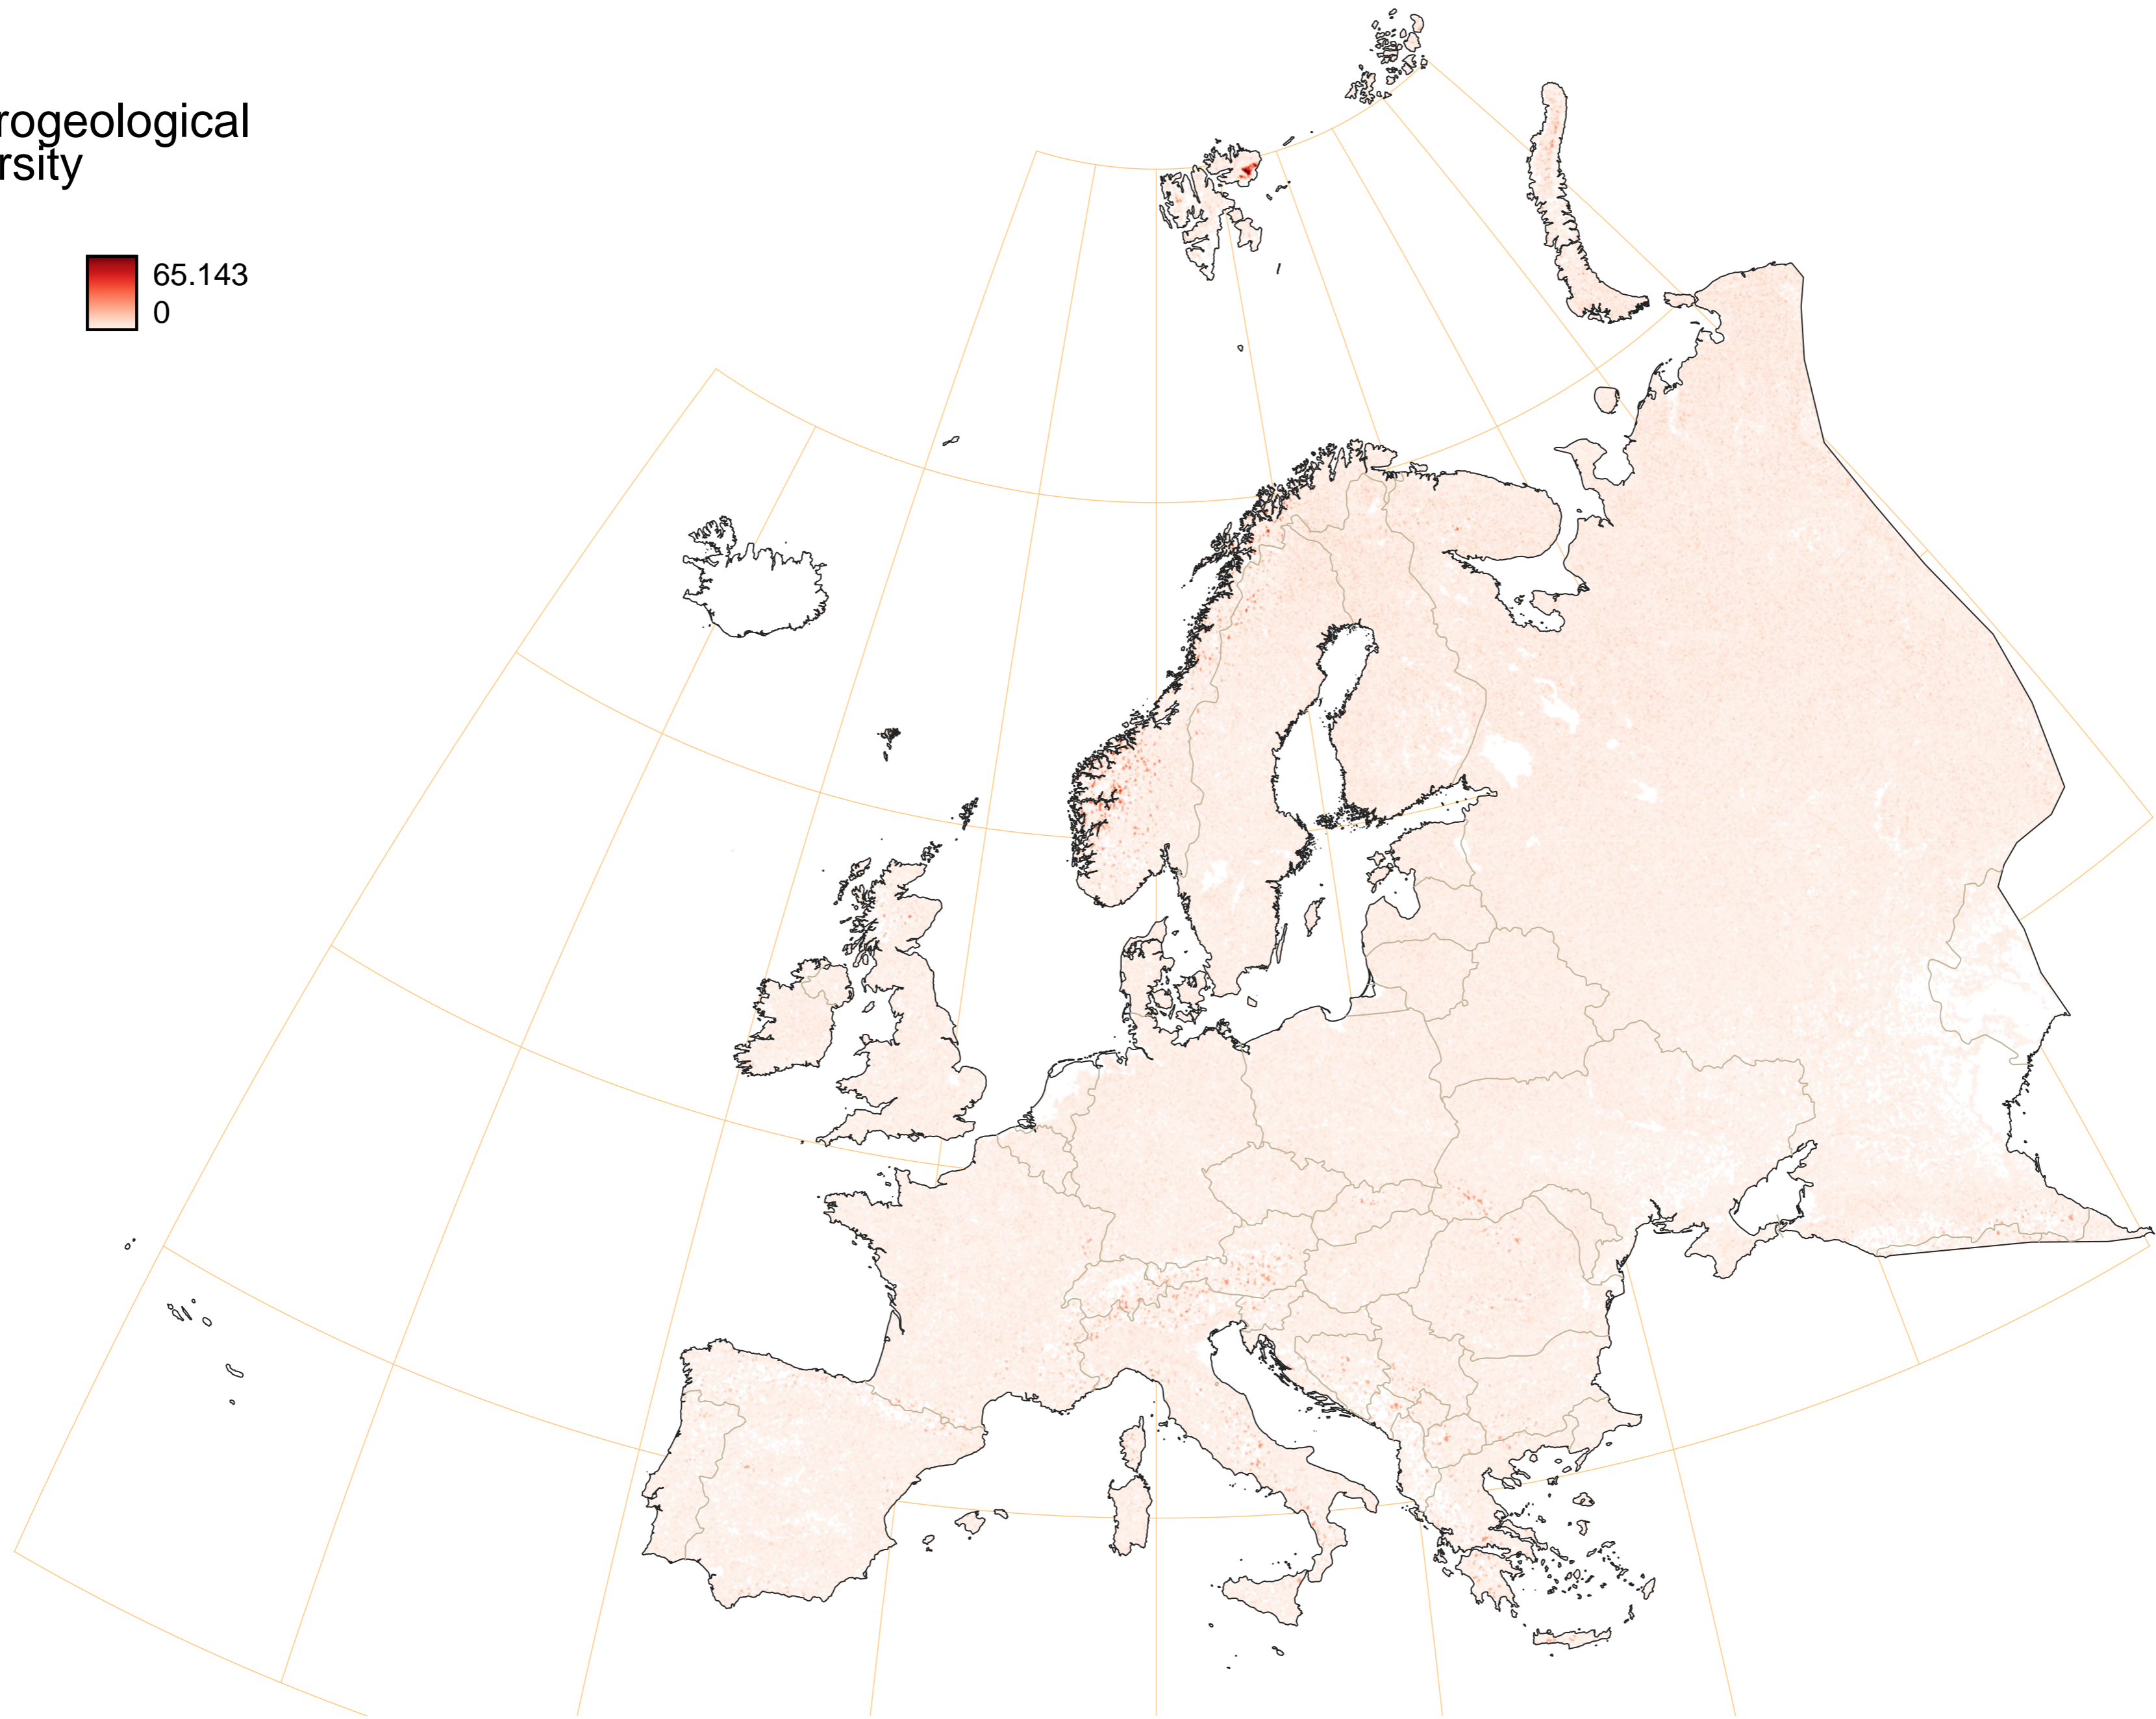

**d**  
Lithological  
diversity

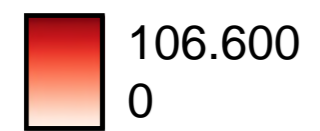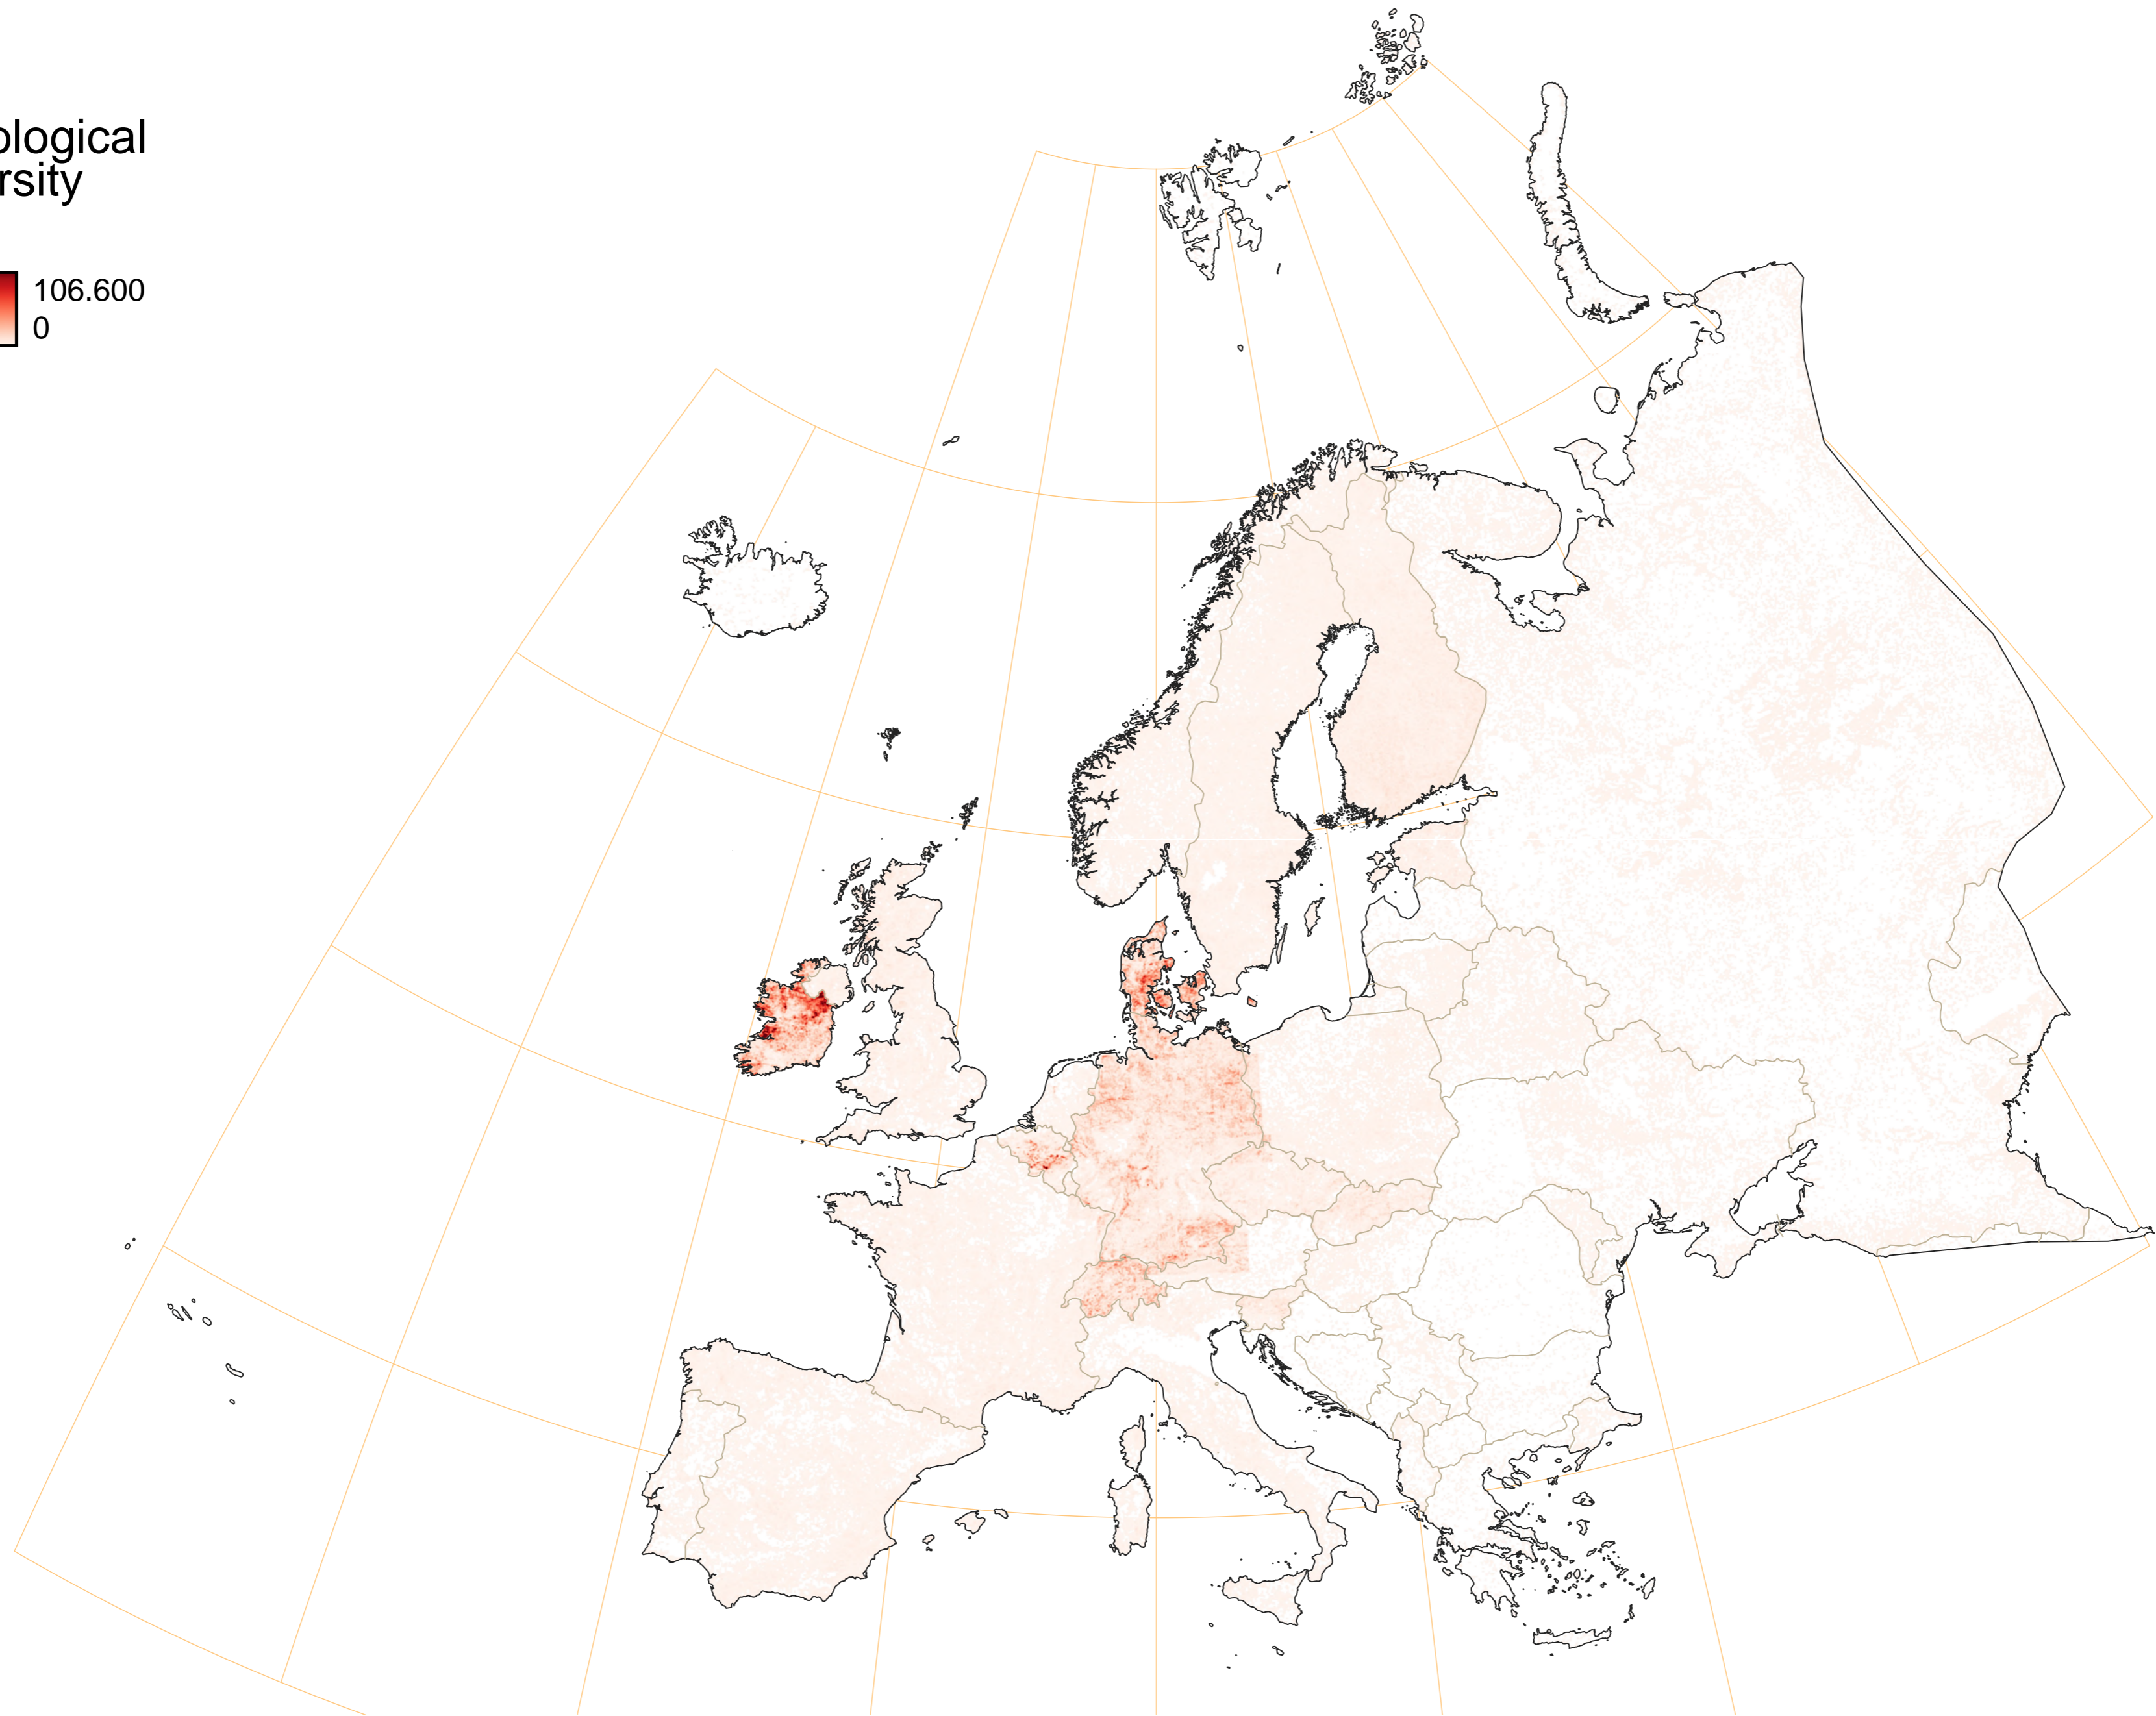

e

Pedodiversity

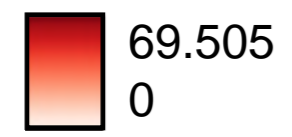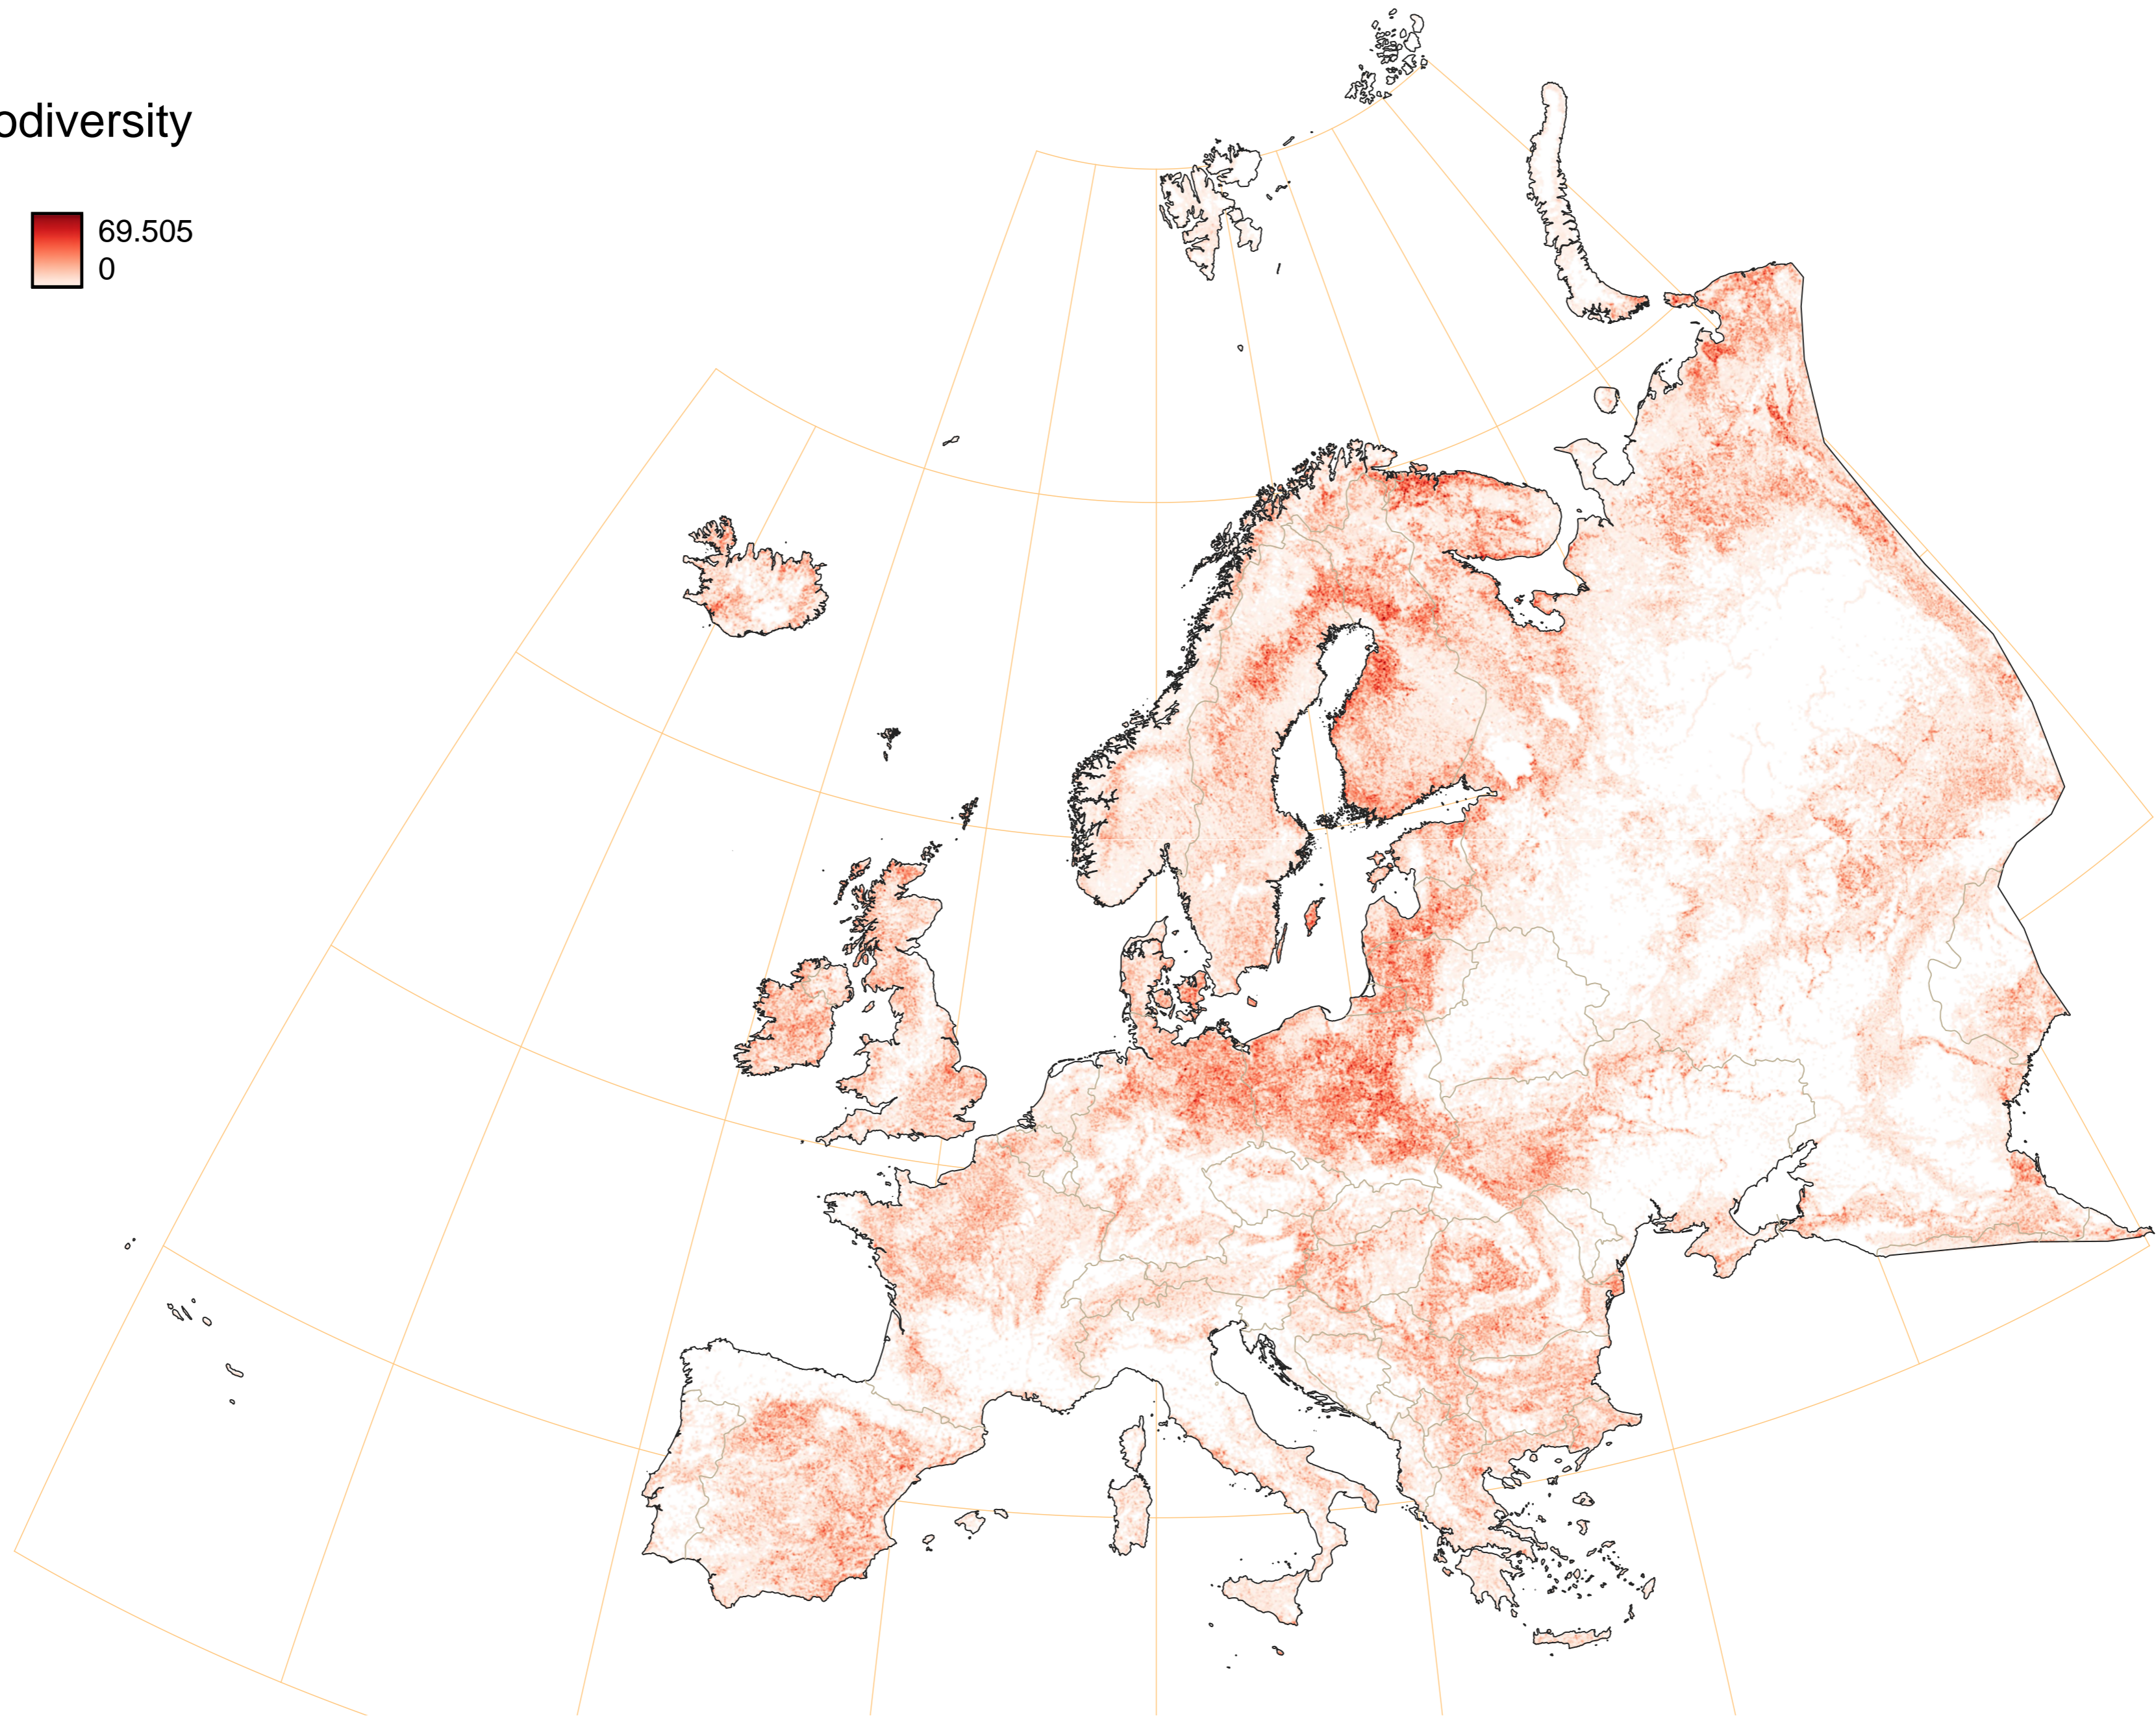

f

Topographic  
diversity

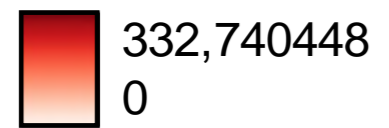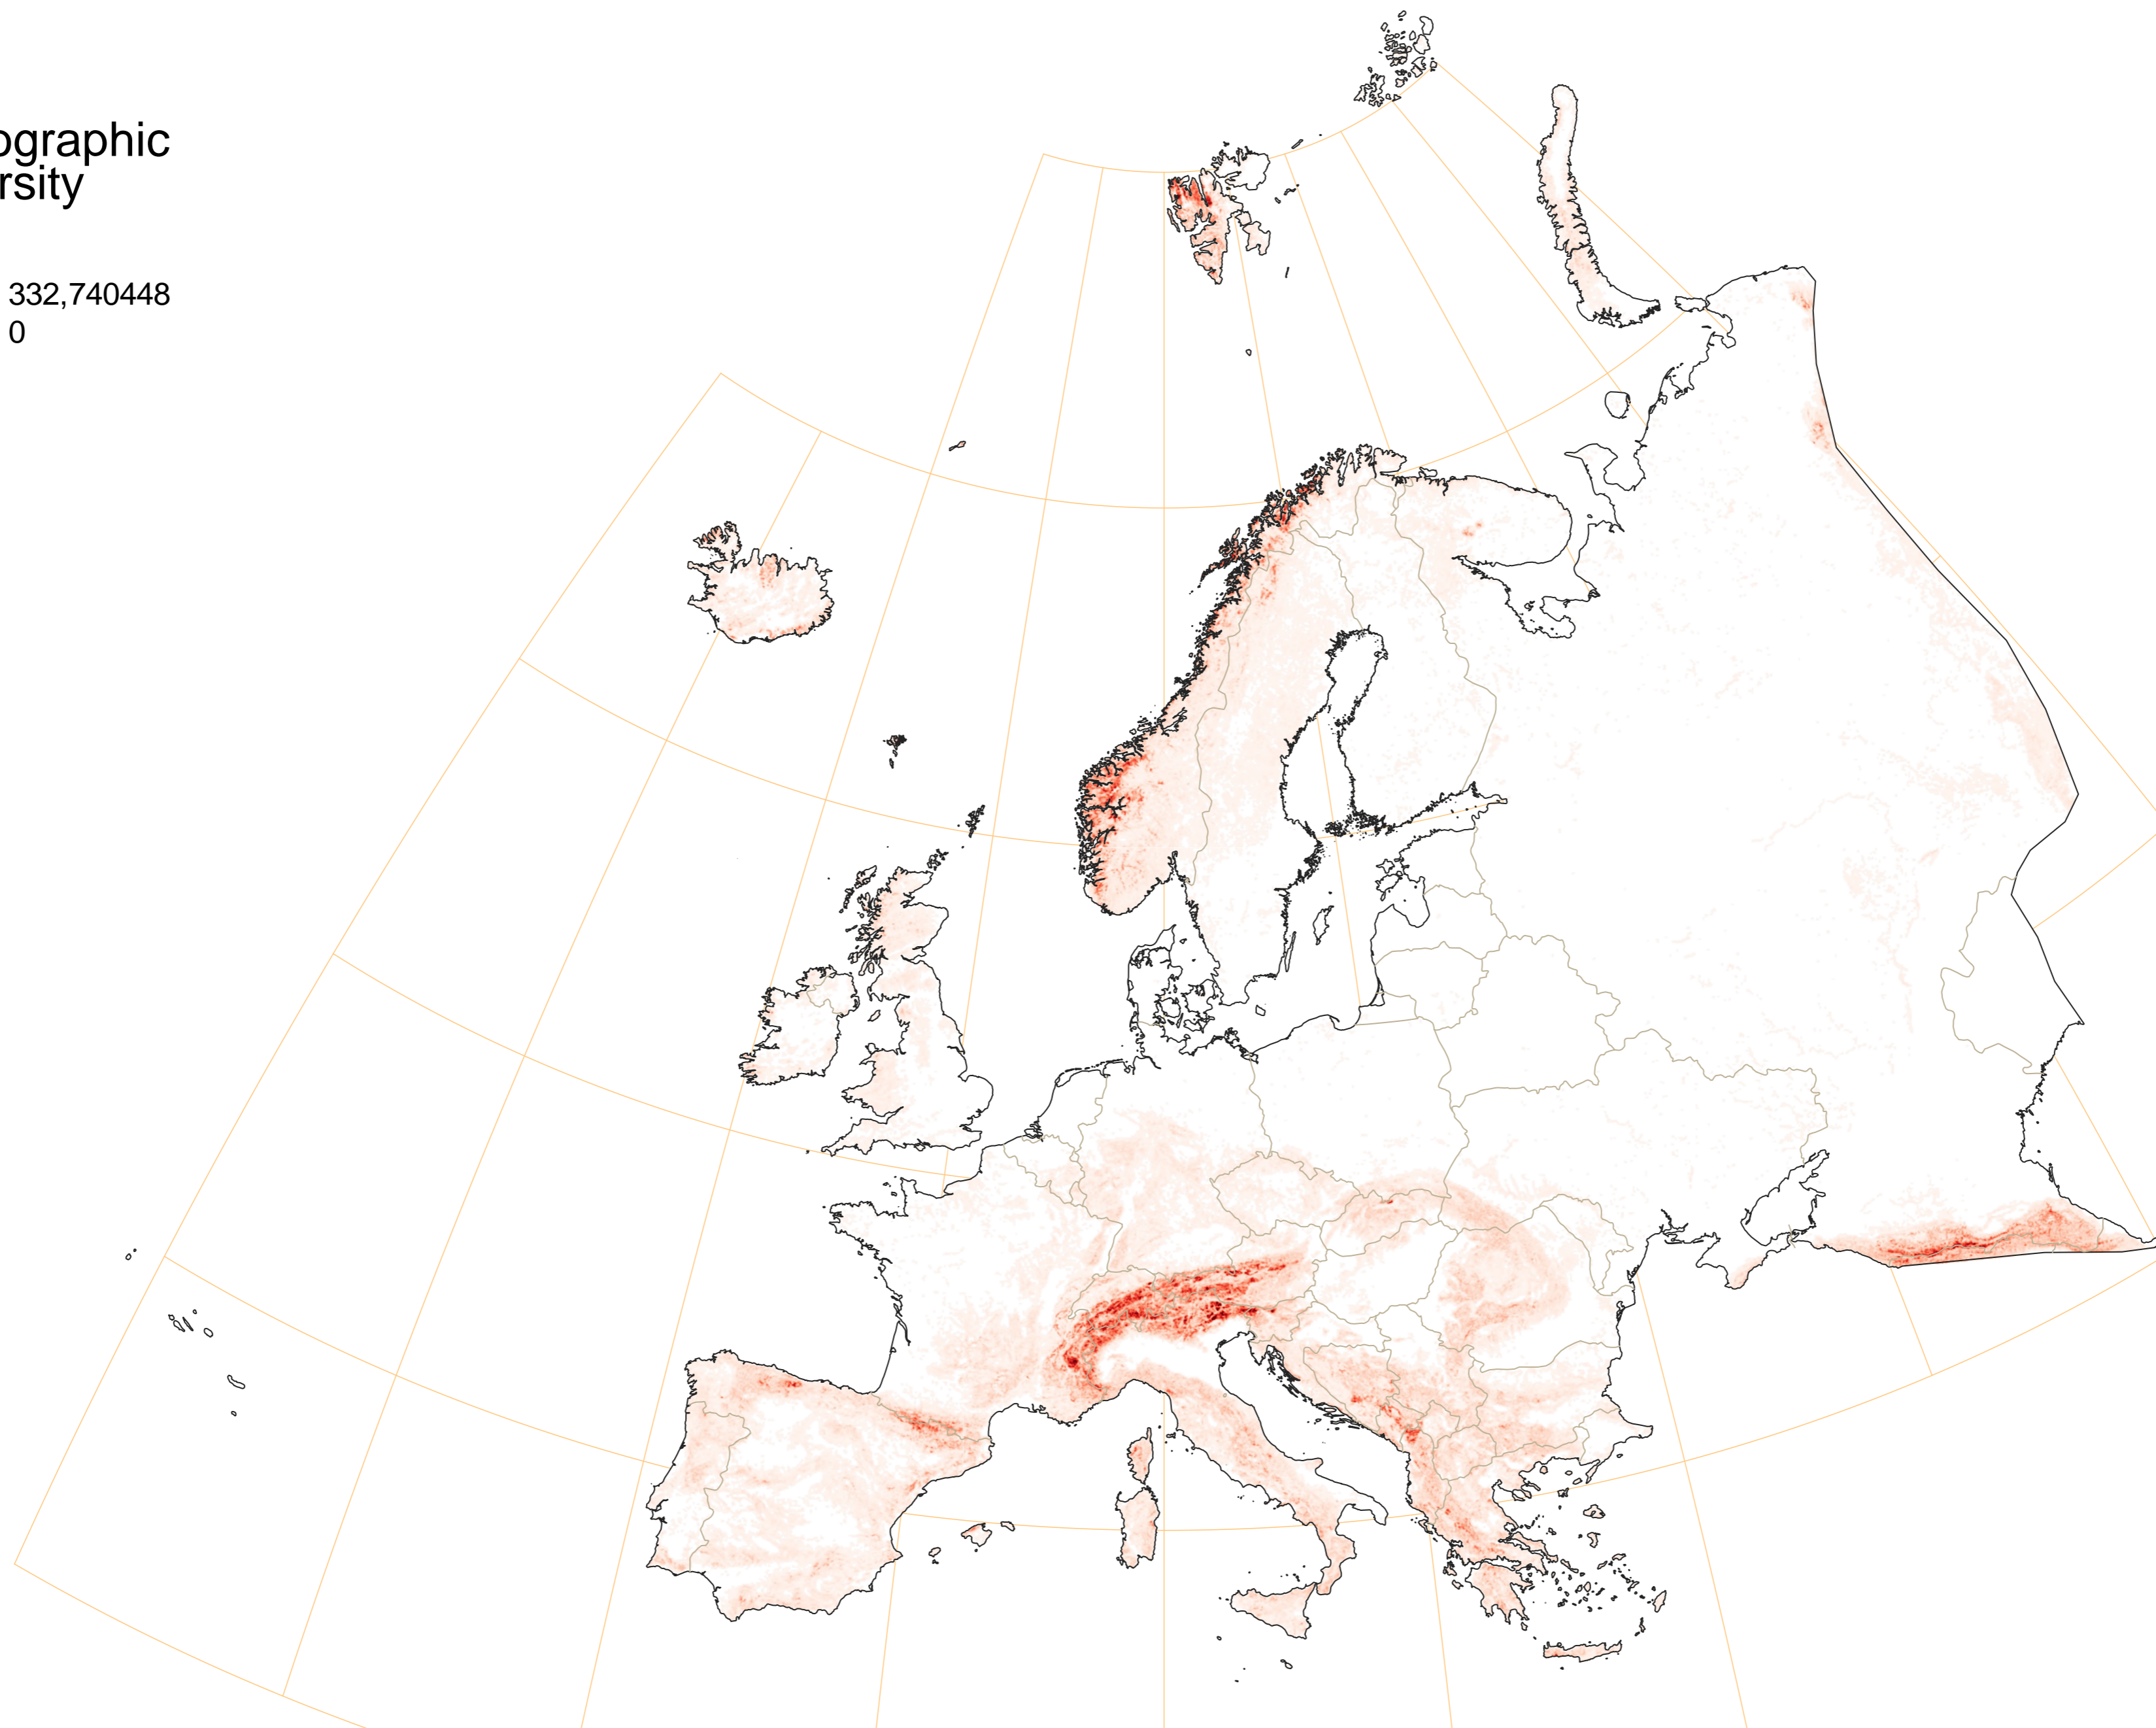

**g**

Total geodiversity

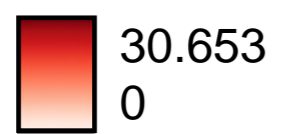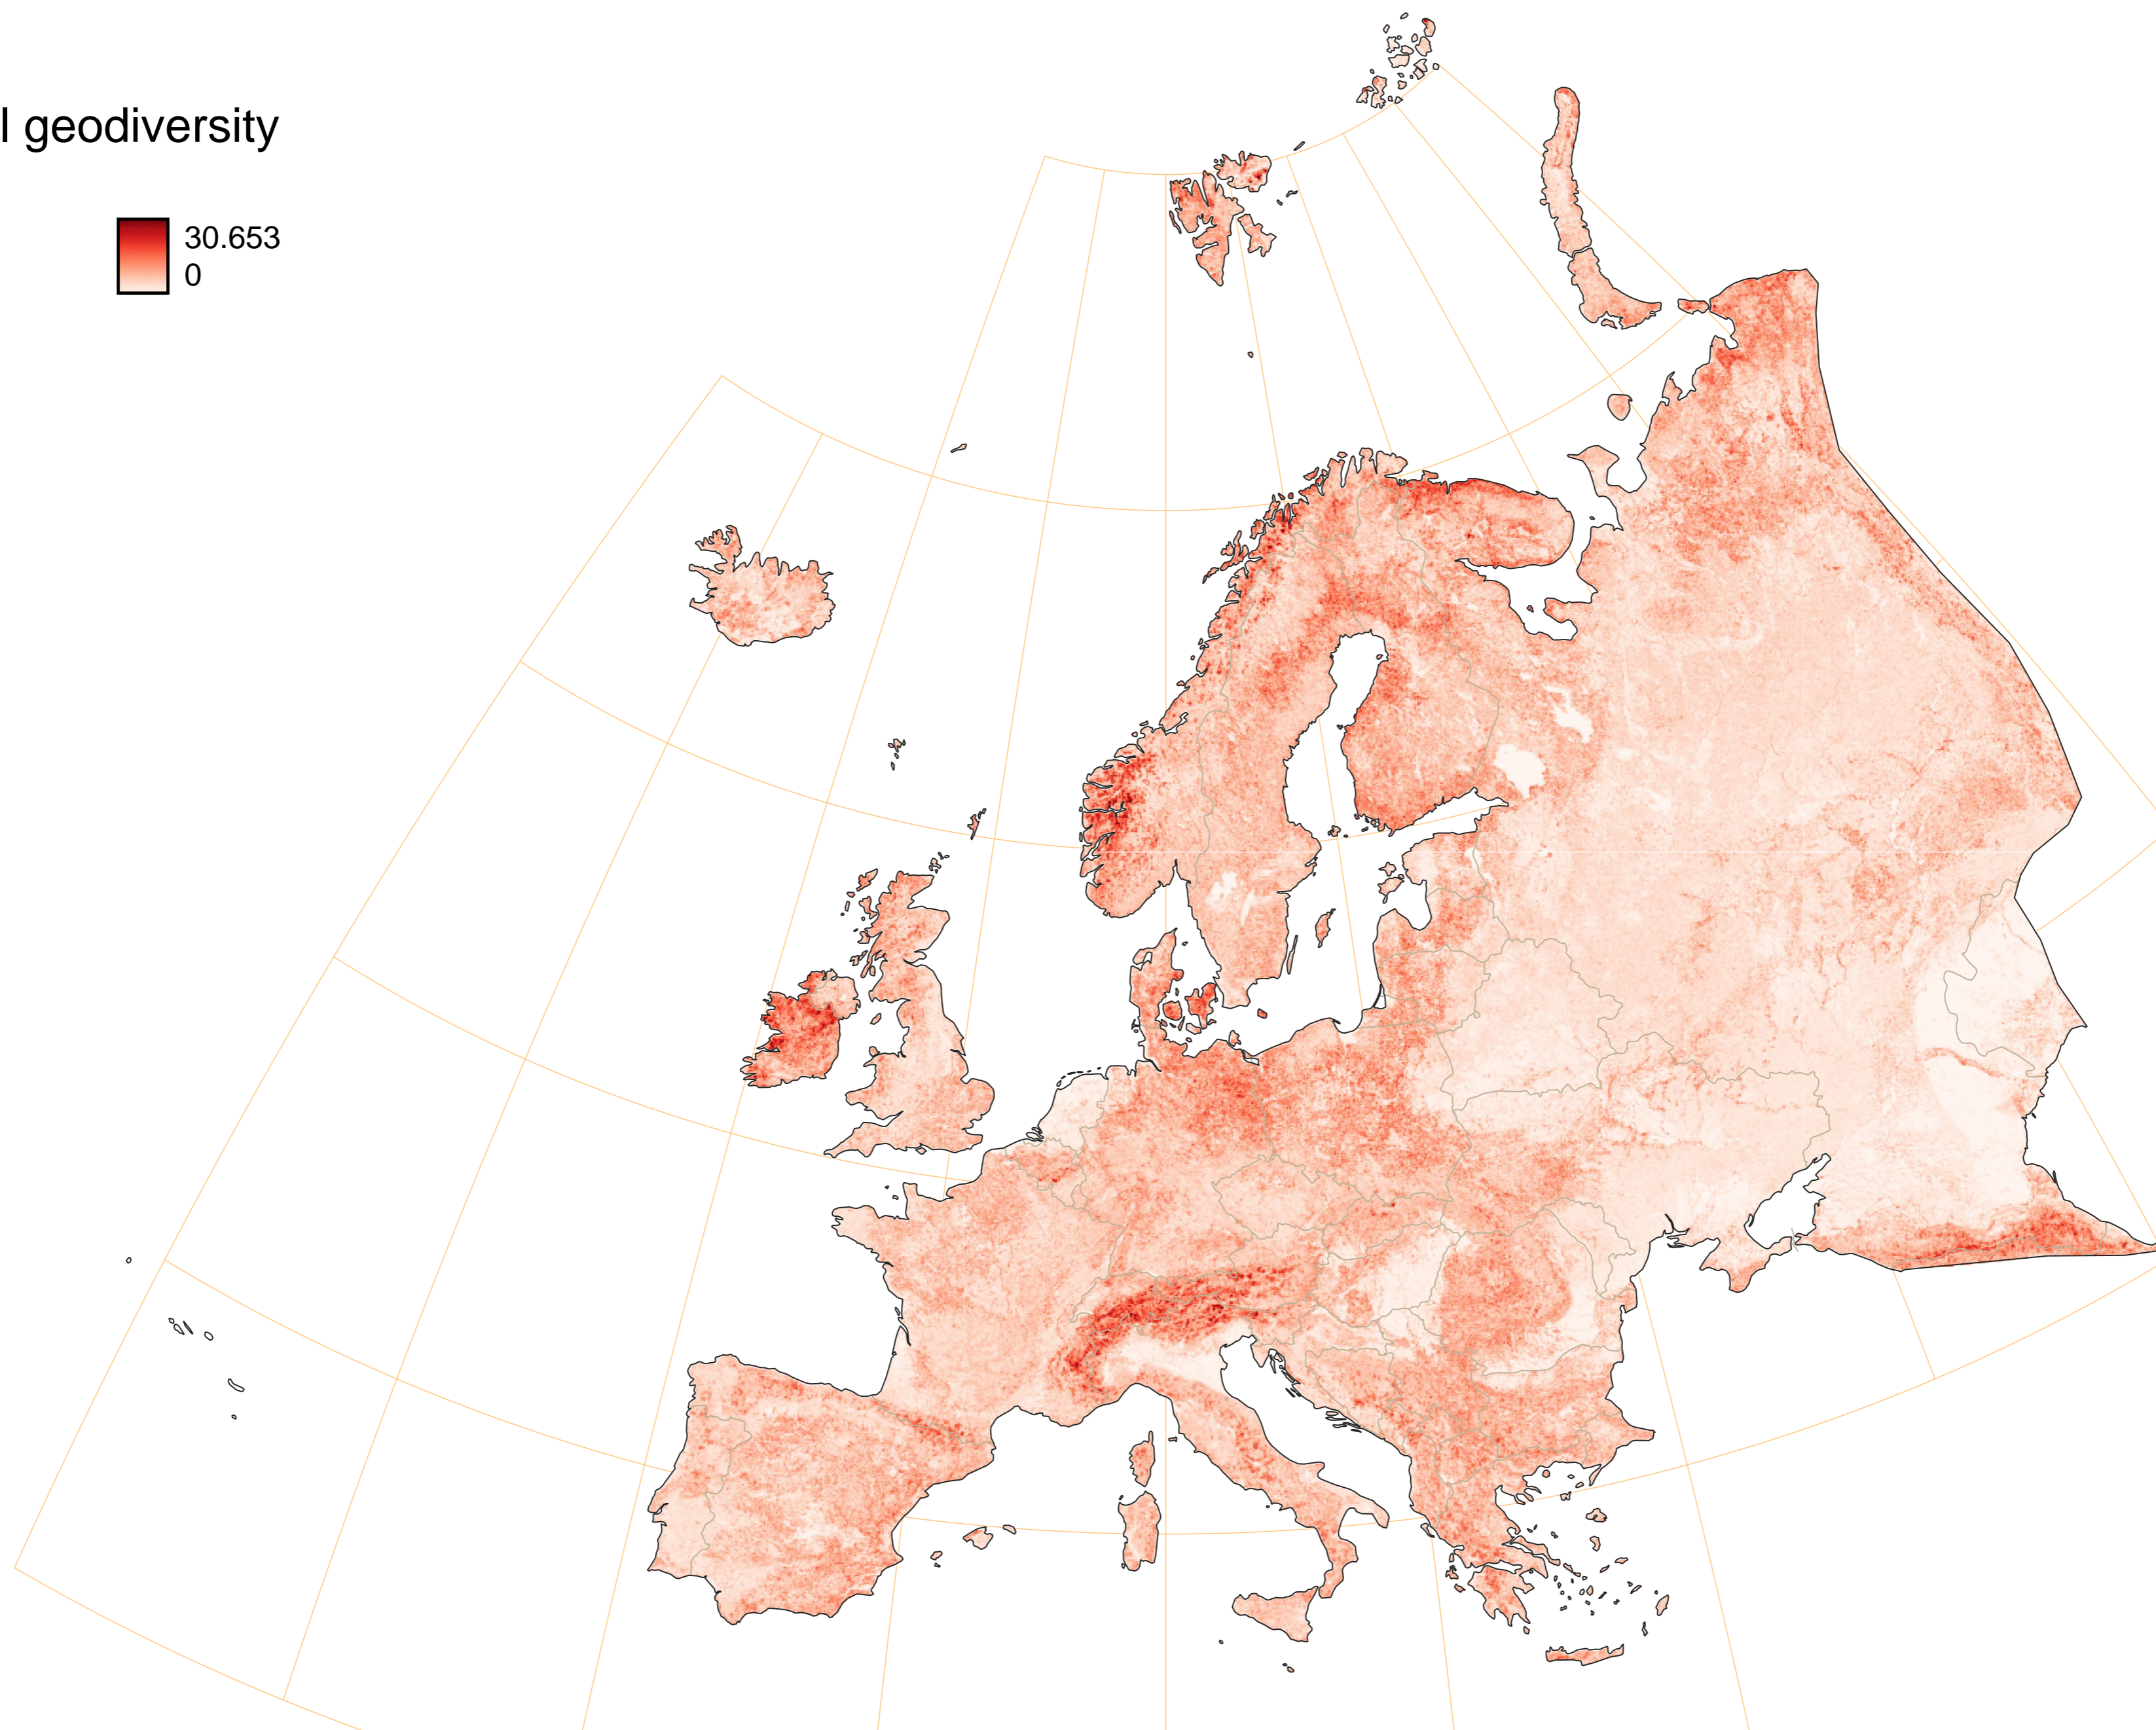

Supplement: s1 [file s1 › Supplementary Material S1.pdf]
