# Supplementary material
Source: MDPI journal article supplement (https://www.mdpi.com/2079-9276/12/5/59)
Supplement: s1 [file s1 › Supplementary Material S2.xls]

## Sheet: Literature_review
Supplementary Material S2. Results of the systematic review of the literature.
No	Authors	Title	State	Included_in_Fig	Main theme	X	Y	Year	Source title	Volume	Issue	Art. No.	Page start	Page end	DOI	Abstract	Author Keywords	Index Keywords	Source
1	Alahuhta J., Ala-Hulkko T., Tukiainen H., Purola L., Akujärvi A., Lampinen R., Hjort J.	The role of geodiversity in providing ecosystem services at broad scales	Finland	no	ecosystem services	26.610085	63.0966542	2018	Ecological Indicators	91			47	56	10.1016/j.ecolind.2018.03.068	Mapping of ecosystem services (ESs) provide valuable information on the geographical variation of ESs and their relation to overall diversity. Although the relationship between biodiversity and ESs has been intensively explored, little is known how geodiversity (i.e., variety of geological, geomorphological and soil features) is associated with different ESs. We studied 1) the spatial variation o…	Biodiversity; Boreal; Ecosystem service trade-off; Geodiversity; High-latitude; Mapping of ecosystem services; Spatial	Biodiversity; Budget control; Carbon; Crops; Cultivation; Economic and social effects; Forestry; Groundwater; Mapping; Boreal; Ecosystem services; Geodiversity; High Latitudes; Spatial; Trade off; Ecosystems; biodiversity; conservation management; ecosystem service; environmental conditions; environmental management; geodiversity; geographical variation; groundwater; landscape change; spatial ana…	Scopus
2	Alessio G., De Lucia M.	Promotion and Development of Protected Volcanic Areas Through Field-Based Environmental Communication Activities: the ‘Gran Cono’ Tour in the Vesuvius National Park (Italy)	Italy		geotourism	14.4267814	40.8280093	2017	Geoheritage	9	3		435	442	10.1007/s12371-017-0242-3	The ‘Gran Cono’ tour in the National Park of Vesuvius (Campania, Italy), is, presented here, a scientific event conceived with the aim of testing how field-based communication activities in protected and active volcanic areas could be important in order to draw attention of people towards the geological value of volcanic sites, and also to raise awareness of local high volcanic hazard. The field …	Environmental communication; Field trip; Protected volcanic areas; Vesuvius National Park	biodiversity; communication network; community organization; education; environmental assessment; environmental values; field method; geodiversity; hazard assessment; heritage conservation; protected area; risk assessment; Campania [Italy]; Italy; Napoli [Campania]; Vesuvius National Park	Scopus
3	Álvarez-Vázquez M.Á., De Uña-Álvarez E.	Inventory and Assessment of Fluvial Potholes to Promote Geoheritage Sustainability (Miño River, NW Spain)	Spain		geoheritage	-8.0478523	43.2600226	2017	Geoheritage	9	4		549	560	10.1007/s12371-016-0213-0	The Miño is the most important river in the NW Iberian Peninsula. When it flows through Ourense town (Spain), the attractiveness of the thermal springs hides the importance of the fluvial potholes developed over bedrock. These forms reflect the strength of erosion processes, linked to fluvial incision over time. Potholes have an environmental, didactic, socio-economic and cultural potential. In o…	Bedrock rivers; Geomorphological heritage; Potholes; Sculpted forms; Sustainability	bedrock; erosion; fluvial deposit; fluvial geomorphology; fluvial landform; geodiversity; heritage tourism; inventory; recreational activity; river system; site investigation; sustainability; thermal spring; World Heritage Site; Galicia [Spain]; Iberian Peninsula; Orense [Galicia]; Spain	Scopus
4	Antoniou, V; Nomikou, P; Bardouli, P; Lampridou, D; Ioannou, T; Kalisperakis, I; Stentoumis, C; Whitworth, M; Krokos, M; Ragia, L	An Interactive Story Map for the Methana Volcanic Peninsula	Greece		geotourism	23.3727075	37.6038946	2018	GISTAM: PROCEEDINGS OF THE 4TH INTERNATIONAL CONFERENCE ON GEOGRAPHICAL INFORMATION SYSTEMS THEORY, APPLICATIONS AND MANAGEMENT				68	78	10.5220/0006702300680078	The purpose of this research is the identification, recording, mapping and photographic imaging of the special volcanic geoforms as well as the cultural monuments of the volcanic Methana Peninsula. With the use of novel methods the aim is to reveal and study the impressive topographic features of the Methana geotope and discover its unique geodiversity. The proposed hiking trails along with the M…	7GIS Story Map; Geomorphology; Methana Peninsula; Greece; Volcano; Geotope; Hiking Trails	DESIGN	Web of Science
5	Antoniou, V; Nomikou, P; Panousis, D; Zafeirakopoulou, E	Nisyros Volcanic Island: A Geosite through a Tailored GIS Story	Greece		education	27.1805083	36.5880193	2021	GEOSCIENCES	11	3	132			10.3390/geosciences11030132	The volcanic island of Nisyros (Greece) is here presented as it presents unique characteristics being a Quaternary volcano in the eastern Aegean Sea, composed of volcanic rocks, and featuring a central caldera that is surrounded by volcanic domes and thick lavas. Its history is strongly connected to the volcano impressing the visitors with steaming hydrothermal craters, intensive smell of sulfur …	Story Maps; geosite; web app	CITIZEN SCIENCE; DESIGN; GEOHERITAGE	Web of Science
6	Argyriou A.V., Sarris A., Teeuw R.M.	Using geoinformatics and geomorphometrics to quantify the geodiversity of Crete, Greece	Greece		geodiversity evaluation	24.9150361	35.2374506	2016	International Journal of Applied Earth Observation and Geoinformation	51			47	59	10.1016/j.jag.2016.04.006	The geodiversity of Crete is quantified in this study, based on the classification of geomorphometric, geological and climatic factors. A number of geomorphometric variables, extracted from the ASTER Global Digital Elevation Model (ASTER G-DEM) in conjunction with geological and climatic information, are evaluated through various algorithms incorporated into Geographical Information System (GIS) …	ASTER G-DEM; Geodiversity; Geoinformatics; Geomorphometrics; Landscape indices	ASTER; deformation; digital elevation model; geodiversity; landscape; morphometry; neotectonics; regional geology; Aegean Islands; Crete [Greece]; Greece	Scopus
7	Bâca I.	A curriculum for learning nature values. case study: Learning geodiversity from bistrita ardeleana gorge (bistrita-nasaud county, Romania)	Romania		geotourism	24.5072859	47.2466745	2015	Geojournal of Tourism and Geosites	15	1		14	24		In the process of conservation of geological heritage should be involved, in addition to specialists, local communities, rangers, authorities and tourists. This requires an appropriate educational setting to organize and coordinate the activities of identification, evaluation and protection of geodiversity. This framework can be assured by the curricula for learning the values of nature, which is…	Curricula; Geoabundance; Geoconservation; Geodiversity; Geoheritage; Geomorphosites; Geoparks; Geosite; Geotourism; Grundtvig; Lifelong learning		Scopus
8	Badura J., Gawlikowska E., Kasiński J.R., Koźma J., Kupetz M., Piwocki M., Rascher J.	"Muskau arch" Geopark - Suggested trans-boundary area of geodiversity conservation [Geopark "Łuk Muεzakowa - Proponowany transgraniczny obszar ochrony georóznorodności]	Poland		geoparks	14.7670122	51.5599629	2003	Przeglad Geologiczny	51	1		54	58		Following the UNESCO/IUGS Programme on Earth Heritage, geologists of Brandenburg started to organise the "Muskau Arch" Geopark. Conservation of a unique (in a global scale) glaciotectonic structure, together with elements of historical mining and values of inanimate natural environment, and promotion of education and geotourism should be the main goals of the Geopark. The geotopes - elements of l…	Geodiversity conservation; Geopark; Geotope; Glaciotectonics; Goetourism; Muzaków Arch	conservation; geological feature; glaciotectonics; heritage conservation; Poland	Scopus
9	Bajer, A; Kirchner, K; Kubalikova, L	GEODIVERSITY VALUES AS A BASIS FOR GEOSITE AND GEOMORPHOSITE ASSESSMENT: A CASE STUDY FROM ZDARSKE VRCHY HIGHLAND	Czechia		geosites	16.0394057	49.6467559	2016	CENTRAL EUROPE AREA IN VIEW OF CURRENT GEOGRAPHY				56	69		Geodiversity is understood as a set of geological, geomorphological, pedological and hydrological components, including systems consisting of these components and geological, geomorphological and pedological processes. It bears various values which are analysed within the ecosystem services context (scientific, cultural, economic, functional values etc.). These values together with geotourism and…	Geodiversity; geoeducation; geotourism; geosite and geomorphosite assessment; Zdarske vrchy Highland		Web of Science
10	Ballesteros D., Jiménez-Sánchez M., Domínguez-Cuesta M.J., García-Sansegundo J., Meléndez-Asensio M.	Geoheritage and geodiversity evaluation of endokarst landscapes: The Picos de Europa National Park, north Spain	Spain		geoheritage	-4.8489112	43.1905912	2015	Environmental Earth Sciences	1			619	627	10.1007/978-3-642-17435-3_69	The endokarst presents a spectacular Geoheritage involving many singular features with thousands to millions years in age. The Picos de Europa National Park has one of the most important karst landscapes in the world. The endokarst of Picos de Europa shows high natural, scientific, and cultural values mainly related to cave features, with a spectacular vertical development (14 % of known world ca…		Earth sciences; Soils; Cantabrian mountains; Cultural value; Geomorphological mapping; National parks; Natural features; Picos de Europa; Quaternary evolution; Sedimentary records; Caves; cave; data set; geomorphology; karst; landscape; mapping method; speleology; Cantabrian Mountains; Castilla y Leon; Leon [Castilla y Leon]; Picos de Europa Regional Park; Spain	Scopus
11	Ballesteros, D; Fernandez-Martinez, E; Carcavilla, L; Jimenez-Sanchez, M	Karst Cave Geoheritage in Protected Areas: Characterisation and Proposals of Management of Deep Caves in the Picos de Europa National Park (Spain)	Spain		geoheritage	-4.8056525	43.1870868	2019	GEOHERITAGE	11	4		1919	1939	10.1007/s12371-019-00416-8	Caves are one of the most spectacular elements of karst with a high natural value, due to their singularity and high diversity of natural features. The Picos de Europa National Park (Spain) is a high mountain protected area that represents the highest density of deep caves of the World (12 deep caves/km(2)). This work analyses geoheritage linked to these caves as a part of broad projects to know …	Cave; Geoheritage; Geomorphology; Karst; Management; State-Pressure-Response model	CANTABRIAN MOUNTAINS; GEODIVERSITY; GEOTOURISM; LANDFORMS; ENDOKARST; GEOPARKS; HERITAGE; SYSTEMS; ORIGIN; TOOLS	Web of Science
12	Banda A., Korjenić A., Temimović E., Čaušević A.	The methodological concept of geoheritage valorization: Blidinje nature park – case study [Metodološki koncept valorizacije geobaštine: Park prirode blidinje – studija slučaja]	Bosnia and Herzegovina		geoheritage	17.5088729	43.5985414	2021	Hrvatski Geografski Glasnik	83	2		79	101	10.21861/HGG.2021.83.02.04	In Bosnia and Herzegovina, there is an evident lack of research in the field of geodiversity valorization, which has resulted in the neglect of its scientific values, as well as insufficient development of geotourism. The aim of this paper is to valorize selected geomorphological sites in Blidinje Nature Park, considering their geotourism value. The applied methodological concept was created as a…	Blidinje Nature Park; Bosnia and Herzegovina; Geoconservation; Geoheritage; Geotourism; Methodology; Tourist valorization	biodiversity; conservation management; conservation planning; geotourism; tourist behavior; valorization; Bosnia and Herzegovina	Scopus
13	Bartus, T	Basic unit size in the analysis of the distribution of spatial landscape elements on the basis of the lithostratigraphic geodiversity of the Ojcow National Park (Poland)	Poland		geodiversity evaluation	19.8305942	50.2055702	2017	GEOLOGY GEOPHYSICS AND ENVIRONMENT	43	2		95	108	10.7494/geol.2017.43.2.95	Spatial analyses of landscape element diversity are always carried out on the basis of a previously established analytical grid. It divides the research area into 'n' smaller areas - basic units before calculating various landscape measures for each of them. The selection of an appropriate analytical grid, particularly its cell size, is a key issue for the results obtained and conclusions drawn f…	basic unit size estimation; landscape; geodiversity; lithostratigraphic geodiversity; Shannon diversity index; Ojcow National Park		Web of Science
14	Benito-Calvo A., Pérez-González A., Magri O., Meza P.	Assessing regional geodiversity: The Iberian Peninsula	Spain, Portugal	no	geodiversity evaluation	-3.9039108	40.1636916	2009	Earth Surface Processes and Landforms	34	10		1433	1445	10.1002/esp.1840	Geodiversity is a landscape characteristic related to the heterogeneity of the physical properties of the earth surface. In this work, we quantify and compare geodiversity in several geodynamic zones of the Iberian Peninsula. For this purpose, we have developed a geographic information system (GIS) procedure to carry out a regional terrain classification based on geodiversity factors. A classific…	DEM; DTM; Geodiversity; GIS; Iberian Peninsula; Spatial pattern analysis; Terrain classification	DEM; DTM; Geodiversity; GIS; Iberian Peninsula; Spatial pattern analysis; Terrain classification; Surface chemistry; Temperature control; Geographic information systems; digital elevation model; geodynamics; GIS; landscape; map; morphometry; spatial analysis; terrain; Eurasia; Europe; Iberian Peninsula; Southern Europe	Scopus
15	Bentivenga M., Geremia F., Palladino G., Prosser G.	The geological heritage of the Appennino Lucano Val d'Agri-Lagonegrese National Park: A first step toward the proposal of a new geopark	Italy		geoheritage	15.8733689	40.3436717	2013	Rendiconti Online Societa Geologica Italiana	28			19	23		The Appennino Lucano Val d'Agri-Lagonegrese National Park has a wide geodiversity with significant geosites that has been used to document the geodynamic processes in the Mediterranean area. The interest in the conservation and promotion of the geological heritage is increasing in the area. A possible future step may be the creation of a Geopark in the area of the Appennino Lucano Val d'Agri-Lago…	Appennino Lucano National Park; Geoheritage; Geosites; Southern Apennines		Scopus
16	Bétard F.	Patch-Scale Relationships Between Geodiversity and Biodiversity in Hard Rock Quarries: Case Study from a Disused Quartzite Quarry in NW France	France		biodiversity and geodiversity	-3.1361924	48.2517636	2013	Geoheritage	5	2		59	71	10.1007/s12371-013-0078-4	While quarrying can cause significant negative impacts on geo- and biodiversity during the extractive operations, abandoned quarries can enhance biodiversity afterwards by acting as refuges for many plant and animal communities, including a range of rare and/or endangered species of high conservation value. Combination of exposed rock walls and bare surfaces, nutrient-poor soils, water bodies and…	Anthropogenic landforms; Armorican Massif; Biological communities; Ecological succession; Quarrying	abandoned land; animal; anthropogenic effect; biodiversity; endangered species; environmental factor; geodiversity; geomorphological mapping; habitat conservation; hard rock; heterogeneity; landscape protection; plant community; quarry; quartzite; rare species; refuge; succession; Armorican Massif; Bretagne; France; Animalia; Invertebrata; Tracheophyta	Scopus
17	Bollati I., Fossati M., Zanoletti E., Zucali M., Magagna A., Pelfini M.	A methodological proposal for the assessment of cliffs equipped for climbing as a component of geoheritage and tools for earth science education: The case of the verbano-cusio-ossola (Western Italian alps)	Italy		geoheritage	8.24117	46.1207275	2016	Journal of the Virtual Explorer	49	1		1	23		Subduction-collision mountain chains are regions where complex geological and geomorphological features due to several Earth-forming processes are exposed. They are characterized by high geodiversity with respect to other geological regions. The sites representing the best examples of these features are referred to as “geodiversity sites”, and, if assessed as valuable for geoconservation and/ or …	Climbing crags; Earth Science education; Geodiversity; Geoheritage; Verbano-Cusio-Ossola Province (Western Italian Alps)		Scopus
18	Bollati I., Zucali M., Giovenco C., Pelfini M.	Geoheritage and sport climbing activities: using the Montestrutto cliff (Austroalpine domain, Western Alps) as an example of scientific and educational representativeness	Italy		geoheritage	7.839362	45.5343605	2014	Italian Journal of Geosciences	133	2		187	199	10.3301/IJG.2013.24	Numerous sites of geological and geomorphological interest (i.e., geosites or geomorphosites) have been recently individuated around the Alps, testifying to the great geodiversity that chara - cterises this mountain range. Some rock cliffs that have been locally equipped as sport climbing sites may also be considered as sites of geological and geomorphological interest: The combination of feature…	Sesia-lanzo zone; Sites of geological and geomorphological interest; Sport climbing; Structural geology	detection method; geodiversity; geomorphology; quantitative analysis; structural geology; Alps; Italy; Western Alps	Scopus
19	Bollati I.M., Cavalli M.	Unraveling the relationship between geomorphodiversity and sediment connectivity in a small alpine catchment	Italy		geomorphological mapping	8.155428	46.2691351	2021	Transactions in GIS	25	5		2481	2500	10.1111/tgis.12793	Mountain regions are characterized by a spatial geomorphic heterogeneity that confers on the environment a significant geomorphodiversity. A methodology based on a different scale/spatial/resolution approach is proposed to evaluate the relationship existing among geomorphodiversity, geomorphological processes. and sediment connectivity. Starting from the geomorphological mapping of the Veglia Dev…		biodiversity; catchment; geodiversity; geomorphological mapping; mountain region; protected area; sediment; topography; Alps; Central Alps; Lepontine Alps	Scopus
20	Bollati I.M., Lenz B.C., Caironi V.	A multidisciplinary approach for physical landscape analysis: Scientific value and risk of degradation of outstanding landforms in the glacial plateau of the Loana Valley (Central-Western Italian Alps)	Italy		risk assessment	8.4742219	46.0834555	2020	Italian Journal of Geosciences	139	2		233	251	10.3301/IJG.2020.01	Landforms characterized by high scientific value (i.e. geomorphosites) might undergo modifications due to intrinsic and extrinsic factors (natural and human-induced processes). In the framework of geoheritage analyses, the assessment of the value (scientific or additional) of geomorphosites should be performed side by side with the analysis on the risk of degradation (fragility and vulnerability)…	Dendrogeomorphology; Geoheritage; Geomorphological mapping; Loana Valley (Central-Western Italian Alps); Physical landscape analysis	alpine environment; assessment method; environmental degradation; geological mapping; glacial environment; interdisciplinary approach; landscape change; physical geography; risk assessment; Alps	Scopus
21	Bollati I.M., Zerboni A.	The Po Plain Loess Basin (Northern Italy): Scientific Values, Threats, and Promotion Opportunities	Italy		geotourism	11.2746217	45.030046	2021	Geoheritage	13	3	74			10.1007/s12371-021-00596-2	Geoheritage studies periodically propose assessment methodologies addressed to quantify the value of sites of interests towards geoconservation and/or promotion. Loess outcrops in the Po Plain Loess basin (Northern Italy) represent potential geoheritage sites, allowing to reconstruct glacial and interglacial cycles, testifying evidence of paleoseismicity, and preserving traces of Palaeolithic hum…	Geodiversity; Geoheritage sites assessment; Loess outcrops; Po Plain (Northern Italy); Promotion strategies; Vulnerability	assessment method; glacial-interglacial cycle; heritage conservation; loess; outcrop; Paleolithic; paleoseismicity; ranking; Comunidad Valencia; Italy; Piedmont [Italy]; Po Plain; Spain; Torino [Piedmont]; Valencia [Comunidad Valencia]; Valencia [Valencia (PRV)]	Scopus
22	Booth K.A., Brayson J.	Geology, landscape and human interactions: Examples from the Isle of Wight	Great Britain		cultural heritage and geodiversity	-1.2956335	50.6751832	2011	Proceedings of the Geologists' Association	122	5		938	948	10.1016/j.pgeola.2011.01.004	The British Geological Survey has recently re-mapped the Isle of Wight at a scale of 1:10,000. This has added to a wealth of geological research already published. Within this paper, we highlight the importance of geology to the heritage of the Isle of Wight and its impacts on everyday life. There is a growing cultural awareness of the variety of landscapes and resources, the geology that underpi…	Geodiversity; Geological landscape interpretation; Geological mapping; Geotourism; Human interaction; Isle of Wight; Mineral extraction	cultural heritage; geodiversity; geological mapping; geological survey; geomorphological mapping; landscape structure; mineral resource; nature-society relations; sustainable development; tourism; England; Isle of Wight; United Kingdom; Dinosauria	Scopus
23	Braholli E., Dhimitri J.	Analysis of the geotouristic potential of geosites in Divjakë-Karavasta National Park, Albania	Albania		geotourism	19.5445275	40.9280685	2022	Geologos	28	2		141	155	10.2478/logos-2022-0011	Elements of geodiversity evaluated for scientific value should be protected, conserved and promoted as potentially important for geotourism. The Divjakë-Karavasta National Park is a large natural area that comprises six geosites along the Adriatic coastline of Albania. Geosites are elements of the geosphere that should be preserved for geoeducation of the present and future generations, in view o…	GAM model; Geodiversity; geoheritage; protected area; SPSS analyses		Scopus
24	Braholli E., Menkshi E.	Geotourism Potentials of Geosites in Durrës Municipality, Albania	Albania		geotourism	19.5271253	41.3626297	2021	Quaestiones Geographicae	40	1		63	73	10.2478/quageo-2021-0005	Present geological and geomorphological objects are non-living features that can enhance curiosity and increase the knowledge of Earth's history, through the development of geotourism. The municipality of Durrës, located in western Albania represents an active tectonic area with numerous landforms, an evidence of geodiversity and geoheritage. In this paper, the most typical geosites are identifie…	Albania; Durrës municipality; geosite; geosite assessment model (GAM); geotourism	cultural heritage; geological structure; geotourism; heritage tourism; Albania; Durres	Scopus
25	Brilha J., Pereira P.	Geoheritage of portugal as the support for nature conservation and land use planning [Património geológico de Portugal como base para ações de conservação da natureza e ordenamento do território]	Portugal	no	geoheritage	-8.0372277	39.9511757	2014	Comunicacoes Geologicas	101			1211	1213		The national inventory of geoheritage comprehends the main Portuguese geosites with high scientific value. These geosites represent the national geodiversity and allow the understanding of the geological evolution of the Portuguese territory. The inventory is available on-line and constitutes a fundamental tool to support nature conservation, land-use planning and environmental impact assessment …	Geosites; Inventory; Land-use planning; Nature conservation; Portugal	environmental impact assessment; geodiversity; inventory; land use planning; nature conservation; Portugal	Scopus
26	Bruno, DE; Perrotta, P	A geotouristic proposal for Amendolara territory (northern ionic sector of Calabria, Italy)	Italy		geotourism	16.5607861	39.9587097	2012	GEOHERITAGE	4	3		139	151	10.1007/s12371-011-0047-8	The Calabria Region is one of the most interesting areas in the world for the extraordinary variety of structural and geomorphologic configurations, an interest which reflects primarily the complex geological processes that characterise it. Moreover, in the Amendolara, geological resources represent both scientific and cultural values and together define the geodiversity significance of this terr…	Geologic heritage; Cultural geomorphology; Cave; GIS	DEFORMATION; TERRACES	Web of Science
27	Bussard J., Giaccone E.	Assessing the ecological value of dynamic mountain geomorphosites	Switzerland		geomorphosites	9.0100288	46.4965541	2021	Geographica Helvetica	76	4		385	399	10.5194/gh-76-385-2021	Geoheritage is a component of geodiversity constituted by all the elements of geodiversity recognized by society for their particular values. The definition of these values, including the importance of geoheritage for biodiversity, plays a key role in the process of heritage recognition and geoconservation policymaking. In mountain environments, dynamic geomorphosites have a strong influence on p…		assessment method; cultural heritage; environmental values; geomorphology; heritage conservation; mountain region	Scopus
28	Butorac V., Buzjak N.	Geodiversity and Landscape Services in the Region of Ogulinsko-Plašćanska Zavala, Croatia	Croatia		ecosystem services	15.3594947	45.2488043	2020	Ekologia Bratislava	39	2		130	144	10.2478/eko-2020-0010	In terms of spatial planning and environment protection procedures in Croatia, geomorphological features as a component of geodiversity are mostly considered marginally. They are considered locally in the scope of certain operations such as urban development, mining, or activities that are being assessed in the environment impact assessment procedures or spatial and strategical planning. Regardin…	geodiversity; landscape typology; relative relief assessment method	biodiversity; geodiversity; landscape change; Croatia	Scopus
29	Canadas, SE; Flano, PR	Geodiversity: Concept, assessment and territorial aplication. the case of Tiermes-Caracena (Soria) [Geodiversidad: Concepto, evaluación y aplicación territorial. El caso de Termes Caracena (Soria)]	Spain		geodiversity evaluation	-3.1622202	41.3291057	2007	Boletin de la Asociacion de Geografos Espanoles		45		79	98+389-393		In this work a review of the geodiversity concept and the studies developed in Spain is made. A restrictive concept of geodiversity have dominated during the last years and the geodiversity have been identified with geological diversity. In this work geodiversity is considerate like a broader concept than mere geological diversity, and is defined by the constituent elements in the physical enviro…	Geoconservation; Geodiversity; Natural diversity; Tiermes		Scopus
30	Cannillo C., Di Gregorio F., Eltrudis A.	Map of the geological and geomorphological sites of the Malfatano coast in SW Sardinia: A contribution to the knowledge of the Island's geodiversity	Italy		geomorphological mapping	8.7971735	38.892778	2005	Alpine and Mediterranean Quaternary	18	1		257	266		The area between Cape Malfatano and Cape Spartivento is emblematic of Sardinia's geology, especially with respect to the Palaeozoic basement, whose lowermost part, the Bithia formation (Precambrian-lower Cambrian?), crops out in this sector. Compared to the tectonic setting typical of the outer zone of the Sardinian segment of the South-European Hercynian chain, this sector constitutes an anomaly…	Geodiversity; Geomorphosites; Geosites; Malfatano coast; South Sardinia		Scopus
31	Carvalhido R.J., Brilha J.B., Pereira D.I.	Designation of Natural Monuments by the Local Administration: the Example of Viana Do Castelo Municipality and its Engagement with Geoconservation (NW Portugal)	Portugal		geoconservation	-8.8287616	41.7068629	2016	Geoheritage	8	3		279	290	10.1007/s12371-016-0183-2	A geosite inventory done in the coastal area of Viana do Castelo district (NW Portugal) revealed the occurrence of important geodiversity elements, mainly geomorphological features such as granite, tectonic, fluvial, aeolian, and cultural landforms. This geoforms record regional tectono-eustatic changes and the major paleoclimatic events from MIS11 to MIS1. The quantitative assessment showed that…	Geological heritage; Geosites; Natural monument; Viana do Castelo Littoral Geopark	administration; conservation planning; cultural heritage; geodiversity; heritage conservation; littoral environment; monument; national park; nature conservation; paleoclimate; planning legislation; Portugal; Viana do Castelo [Portugal]	Scopus
32	Carvalhido R.P., Brilha J., Pereira D.I.	Natural monuments of viana do castelo: Designation and valuation processes [Monumentos Naturais Locais de Viana do Castelo: Processo de classificação e estratégias de valorização]	Portugal		geoconservation	-8.8359714	41.7084007	2014	Comunicacoes Geologicas	101			1219	1233		The geosites inventory performed in the north littoral of Viana do Castelo revealed that the territory is endowed with high geodiversity preserving elements of great interest mainly in topics of geomorphology, particularly granite, tectonic, fluvial, aeolian and cultural landforms. The quantitative analysis showed that among the 17 identified geosites, 5 present exceptional scientific geological …	Geodiversity; Geological heritage; Local natural monuments; Viana do castelo	cultural heritage; geodiversity; monument; nature conservation; protected area; quantitative analysis; valuation; Portugal; Viana do Castelo [Portugal]	Scopus
33	Chrobak A., Novotný J., Struś P.	Geodiversity Assessment as a First Step in Designating Areas of Geotourism Potential. Case Study: Western Carpathians	Poland, Slovakia, Hungary	no	geotourism	20.3359379	49.648055	2021	Frontiers in Earth Science	9		752669			10.3389/feart.2021.752669	Geodiversity is the natural diversity of features of geological structure, relief, and soil cover, including the relationships between these features, their properties, and their impact on other elements of the natural and cultural environment. It is described and analyzed using various types of quantitative, qualitative, or quantitative–qualitative methods. The concept of a geodiversity map pres…	assessment methods; geodiversity; geoheritage; geotourism; mapping; Western Carpathians	analytical hierarchy process; geodiversity; geological mapping; geological structure; geotourism; nature conservation; qualitative analysis; quantitative analysis; tourist destination; Carpathians; Western Carpathians	Scopus
34	Comanescu, L; Nedelea, A	The assessment of geodiversity - a premise for declaring the geopark Buzului County (Romania)	Romania		geoparks	26.6777352	45.0772854	2012	JOURNAL OF EARTH SYSTEM SCIENCE	121	6		1493	1500	10.1007/s12040-012-0244-0	The geopark Buzului County does not belong to the Geoparks European Network, as there are numerous governmental, legislative and scientific initiatives in this respect. The geopark is situated in the central-south-eastern part of Romania (in Buzau county) and it has a special potential of geological, geomorphological, biogeographical and anthropic nature, a potential which has to be developed and…	Geopark; geodiversity; evaluation; Buzaului County; Subcarpathians; Romania		Web of Science
35	Čonč Š.	The importance of protection of geodiversity hotspots for the conservation of biodiversity in the natura 2000 area in the dragonja river valley [Pomen varovanja vročih točk geodiverzitete za ohranitev biotske pestrosti na območju nature 2000 v dolini reke dragonje]	Slovenia		biodiversity and geodiversity	13.6685801	45.4539603	2020	Geografski Vestnik	92	2		9	28	10.3986/GV92201	The purpose of the article is to evaluate geodiversity in Natura 2000 protected area and to provide guidelines for inclusion in the existing nature protection system. The Dragonja River basin (SW Slovenia) was selected as a study area. Based on cartographic material and field work we made a morphographic map of the area, and based on the literature we adjusted the method of calculating the geodiv…	Biodiversity; Dragonja river; Geodiversity; GIS; Natura 2000; Nature conservation	biodiversity; conservation management; geodiversity; GIS; nature conservation; satellite data; satellite imagery; Dragonja Basin	Scopus
36	Costa-Casais M., Alves M.I.C., Blanco-Chao R.	Assessment and management of the geomorphological heritage of Monte Pindo (NW Spain): A landscape as a symbol of identity	Spain		geoheritage	-9.0913789	42.8842093	2015	Sustainability (Switzerland)	7	6		7049	7085	10.3390/su7067049	This study focuses on the granite mountain known as Monte Pindo (627 m above sea level) in the Autonomous Community of Galicia (NW Spain). This territory is included in the area classified as "Costa da Morte" in the "Politica de Ordenación Litoral" (POL) (Coastal Planning Policy) for the region of Galicia. This coastal unit, located between "Rías Baixas" and "Cape Fisterra" has great potential fo…	Galicia-NW Spain; Geodiversity; Geomorphological heritage; Geomorphosites; Geopark; Landscape; Monte Pindo; Sustainable management	biodiversity; conservation planning; cultural heritage; geomorphological response; granite; inventory; landscape change; mountain; sea level; sustainability; Costa da Morte; Galicia [Spain]; La Coruna [Galicia]; Spain	Scopus
37	Costa-Casais M., Caetano Alves M.I.	Geological Heritage at Risk in NW Spain. Quaternary Deposits and Landforms of "Southern Coast" (Baiona-A Garda)	Spain		risk assessment	-8.860666	41.9351741	2013	Geoheritage	5	4		227	248	10.1007/s12371-013-0083-7	Over the last decade, a knowledge base has been built up worldwide in relation to geological heritage and geodiversity, and respective working methodologies. However, the absence of knowledge and technical information by the local, regional and national authorities about geosites makes it difficult to create appropriate legislation and to assure a good management. There is also a public ignorance…	Coast deposits; Galicia-NW Spain; Geoconservation; Geological heritage; Geosites; Pleistocene-Holocene	biodiversity; coast; geodiversity; geological survey; landform; legislation; Quaternary; Galicia [Spain]; Spain	Scopus
38	Costantini A.	Geodiversity and geosites: Trade-mark and distinctive signs of the siena and grosseto territories [Geodiversità e geositi: Marchio e valore aggiunto dei territori delle province di Siena e Grosseto]	Italy		geosites	11.2734267	42.7254265	2010	Rendiconti Online Societa Geologica Italiana	12			26	32		Aim of this work is to identify the cultural assumptions and the reference procedures for the evaluation, validation and improvement of the geological heritage and to define the concept of Geodiversity as trade-mark and naturalistic value of a territory. In the last decade the Earth Science Department of the University of Siena has managed several projects to set off the geological heritage of th…	Geoconservation; Geodiversity; Geosites; Siena and grosseto province; Tuscany		Scopus
39	Cruz R., Goy J.L., Zazo C.	Hydrological Patrimony in the mountainous areas of Spain: Geodiversity inventory and cataloguing of the Sierras De Béjar and Del Barco (in the Sierra de Gredos of the Central System)	Spain		geodiversity evaluation	-5.0861655	40.2906809	2014	Environmental Earth Sciences	71	1		85	97	10.1007/s12665-013-2697-0	This study focused on the Béjar and Barco tectonic massifs (in the Sierra de Gredos, Spain), in which a large part of the region has been declared a Protected Natural Space. An inventory and assessment of the Hydrological Patrimony was conducted with the objective of assisting planners in the sustainable management of the most representative and/or fragile assets. To perform this inventory, a met…	Areas; Geodiversity; Natural heritage; Protected natural area; Sites and points of hydrological interest	Areas; Geodiversity; Natural heritages; Protected natural areas; Sites and points of hydrological interest; Soils; Earth sciences; conservation planning; geodiversity; hydrology; mountain region; nature conservation; sustainable development; tectonic structure; Spain	Scopus
40	Cruz R., Martínez-Graña A., Goy J.L., Nogueira N.	Analysis of the Geological Heritage and Geodiversity Index of Two Mountainous Areas in Spain: Béjar and El Barco Massifs	Spain		geodiversity evaluation	-5.7415379	40.3564782	2021	Geoheritage	13	3	62			10.1007/s12371-021-00587-3	This article identifies, describes, and characterizes, based on the analysis of 20 geosites, the geological heritage of the Béjar and El Barco massifs. Using 22 characteristics, and weighting coefficients, these geosites were qualitatively and quantitatively assessed (representativeness, accessibility, etc.) and classified into different groups depending on their extension (area, location, and po…	Béjar and El Barco massifs; Geodiversity index; Geoheritage; Glacier modelling	geodiversity; geomorphology; heritage conservation; index method; maximum sustainable yield; mountain region; surface area; sustainability; Spain	Scopus
41	Cuomo A., Guida D.	Discharge-electrical conductivity relationship in the Ciciriello Torrent, a reference catchment of the Cilento, Vallo Diano and Alburni European Geopark (Southern Italy)	Italy		hydrodiversity	15.3201927	40.5388702	2013	Rendiconti Online Societa Geologica Italiana	28			36	40		Hydro-geomorphology is the key to link hydrology, hydraulics and ecological approaches in the European Water Framework Directive (hereafter, EWF) applications and management at local and regional level. The hydro-geomorphological response of a catchment to rainfall results by complex interactions between physical, biological and human processes, operating in the drainage basin system at different…	Cilento; Discharge-electrical conductivity relationship; Hydro-geomorphology; Runoff component separation; Vallo Diano and Alburni European Geopark		Scopus
42	Danese M., Gioia D., Amodio A.M., Corrado G., Schiattarella M.	A Spatial Method for the Geodiversity Fragmentation Assessment of Basilicata Region, Southern Italy	Italy		geodiversity evaluation	15.9445242	40.6167873	2021	Lecture Notes in Computer Science (including subseries Lecture Notes in Artificial Intelligence and Lecture Notes in Bioinformatics)	12951 LNCS			620	631	10.1007/978-3-030-86970-0_43	The heterogeneity of the abiotic factor, or geodiversity, is an important issue for the landscape genetics. In this paper, a spatial method for the assessment of the geodiversity of Basilicata region in southern Italy is proposed through the use of fragmentation indexes. The fragmentation indices use the values derived from the overlay of three different maps: i) landform map; ii) climate map; ii…	Basilicata region (southern Italy); Climatic classes; Fragmentation indexes; Geodiversity; Landform classification; Spatial analysis	Spatial variables measurement; Abiotic factors; Basilicatum region (southern italy); Climatic class; Diversity index; Fragmentation index; Geodiversity; Landform classification; Shannon; Southern Italy; Spatial analysis; Landforms	Scopus
43	Daniela R., Liviu B., Octavian-Liviu M., Danut P., Cristian M.	Integrated geodiversity assessment of the northern oltenia region (Romania)	Romania		geodiversity evaluation	25.1149511	44.3100043	2015	International Multidisciplinary Scientific GeoConference Surveying Geology and Mining Ecology Management, SGEM	2	5		271	278		The aim of this paper is to assess the characteristics of geodiversity in North Oltenia Region, a historic Romanian territory that overlaps partially both, Southern Carpathians and Getic Sub-Carpathians. As a concept, geodiversity refers to the spatial variability of geological, geomorphological and soil features and it consists of features from the geosphere (geology, geomorphology), topography,…	Geodiversity; GIS; Index; Northern Oltenia; Romania	Conservation; Deforestation; Geographic information systems; Geology; Geomorphology; Landforms; Limestone; Natural resources management; Waste management; Conservation planning; Geodiversity; Geomorphological mapping; Index; Natural landscapes; Northern Oltenia; Romania; Spatial variability; Environmental impact	Scopus
44	De Una-Alvarez, E; Alvarez-Vazquez, MA; Cuquejo-Bello, MD	Landform values for rural sustainability: Recognition and assessment in a Spanish-Portuguese border region case study	Spain, Portugal		sustainability	-7.7147902	41.9342042	2017	MORAVIAN GEOGRAPHICAL REPORTS	25	4		257	270	10.1515/mgr-2017-0022	Landform assemblages may be used to define sites of geomorphological interest which are resources for rural sustainability. This paper focuses on the valuation and significance of such sites in the context of one European internal border region, illustrated using a case study from the inland mountains of the Spanish-Portuguese border: the Serra do Larouco. The theoretical and methodological appro…	landforms; geomorphological site; rural sustainability; European border region; Serra do Larouco; Galicia (North West Spain); North of Portugal Mountains	GEOMORPHOLOGICAL INVENTORY; ECONOMIC-CRISIS; HORY MTS.; GEOMORPHOSITE; HERITAGE; GEOCONSERVATION; GEODIVERSITY; GEOSITE; TOOL	Web of Science
45	de Wever P., Cornée A.	An inventory of the French geological heritage [Un inventaire du patrimoine géologique pour la France]	France	no	geoheritage	3.9749404	47.2641139	2011	Geologie de la France		1		5	10		According to P. Billet's definition (2002), the geological heritage is composed of all the Earth historical remains contributing in some way to the knowledge of physical or biological events having shaped our planet. But all outcrops and geological features do not belong to this heritage. The geologist has to distinguish from ordinary geological features the remarkable ones which must be passed o…	Broadcasting; France; Geoconservation; Geodiversity; Geological heritage; Inventory; Valorization	geodiversity; heritage conservation; homogeneity; inventory; model validation; preservation; Site of Special Scientific Interest; France	Scopus
46	Diolaiuti G., Smiraglia C.	Changing glaciers in a changing climate: How vanishing geomorphosites have been driving deep changes in mountain landscapes and environments	Italy		geomorphosites	6.6336318	45.9280182	2010	Geomorphologie: Relief, Processus, Environnement		2		131	152	10.4000/geomorphologie.7882	The retreat of glaciers worldwide, from the Alpine areas to Antarctica, in the course of the last few decades, is frequently mentioned as a clear and unambiguous sign of global warming. In the Alps, although the warming experienced since the early 1980s is synchronous with warming at the global scale, nevertheless its amplitude is greater and it represents roughly a two-fold amplification of the …	Alpine glaciers; Climate change; High mountain geodiversity; Natural heritage		Scopus
47	Dulias R.	Drift sand fields as a result of past and current deforestation in the Silesian-Cracow Upland, Poland	Poland		geomorphosites	19.5182185	50.3428866	2018	Land Degradation and Development	29	5		1530	1539	10.1002/ldr.2888	The Silesian-Cracow Upland, due to the exceptionally large reserves of various natural resources, was under the influence of intense human activity throughout the last millennium. Economic development of the Upland began in the Middle Ages by mining and smelting of iron ore, silver, and lead; from the 18th to the 20th century, the area experienced intense exploitation of coal, zinc and lead ores,…	anthropogenic desert; deforestation; drift sands; human impact	Biodiversity; Deforestation; Iron ores; Landforms; Lead smelting; Lime; Zinc smelting; Aeolian process; Anthropogenic desert; Archaeological studies; Economic development; Human activities; Human impact; Last millenniums; Local authorities; Sand; anthropogenic effect; deforestation; desert; human activity; metallurgy; Middle Ages; mining; sand; Cracow; Malopolskie; Poland [Central Europe]; Silesi…	Scopus
48	Ealey P.J., James H.C.L.	Countybridge Quarry, the Lizard Peninsula, Cornwall - Historical and geological significance of an abandoned quarry	Great Britain		cultural heritage and geodiversity	-5.1928365	50.056175	2008	Geoscience in South-West England	12	1		22	26		Countybridge Quarry, a Cornwall County Geology site (RIGS), is an abandoned serpentinite quarry that started in the 19th Century as one of a number of small local quarries, and subsequently became one of the larger quarries in the region. Together with the adjacent Trevassack Quarry, it was the principal and effectively the last source of serpentinite building material in the 20th Century on the …	Countybridge quarry; Lizard Loess Fm; Lizard Peninsula; Quaternary	abandoned mine; bedrock; carbonate; loess; quantitative analysis; quarry; serpentinite; soil cover; spoil heap; twentieth century; Cornwall [England]; England; Eurasia; Europe; Lizard Peninsula; United Kingdom; Western Europe; Apoidea; Characeae; Squamata	Scopus
49	Erhartič B., Zorn M.	Geodiversity and geomorphosite research in Slovenia	Slovenia	no	geomorphosites	14.7456326	46.0519634	2012	Geografski Vestnik	84	1		51	63		Slovenia's geodiversity, or its abiotic natural diversity, becomes more and more significant when considering regulations on nature conservation. This article presents theoretical background information to the study of geodiversity and geomorphological heritage and the current state of this field in Slovenia. The first quantitative evaluation of geomorphological heritage in Slovenia, which was ca…	Geodiversity; Geography; Geomorphology; Geomorphosites; Nature conservation; Slovenia; Triglav Lakes Valley	geodiversity; geographical theory; geomorphological mapping; heritage conservation; morphostructure; nature conservation; quantitative analysis; Slovenia	Scopus
50	Erikstad L., Bakkestuen V., Dahl R., Arntsen M.L., Margreth A., Angvik T.L., Wickström L.	Multivariate Analysis of Geological Data for Regional Studies of Geodiversity	Norway		geodiversity evaluation	12.1451179	61.7683442	2022	Resources	11	6	51			10.3390/resources11060051	In Norway, a landscape map exists which gives the opportunity to collect data in landscape units for further analysis. This study covers parts of Norway and Sweden, so the landscape map was extended into Sweden to form a unified landscape structure. A collection of geological and terrain data within landscape units can serve as a tool to describe the geodiversity profile of the units, study their…	geodiversity clustering; geodiversity profile; landscape; multivariate analysis		Scopus
51	Fabbrocino S., Paduano P., Todisco F., Muraro C., Lettieri M.T.	Geological features and groundwater resources in the Cilento, Vallo di Diano and Alburni National Park	Italy		geodiversity evaluation	15.4379867	40.2834582	2013	Rendiconti Online Societa Geologica Italiana	28			54	57		An European Geopark has to support the economic development of its region focusing on the geological heritage and on the correct management of natural resources. The development of a reliable geological model points out the synergy between geodiversity, biodiversity and culture, especially when their relationships can be explained to visitors. To achieve this target, the Cilento, Vallo di Diano a…	Geodynamic setting; Geological map; Groundwater resources; Hydrogeological map		Scopus
52	Faccini, F; Galiano, IC; Paliaga, G; Roccati, A	The geological layout of Landscape Master Plan: an example from Liguria (Italy)	Italy		geoconservation	8.3654403	44.4166933	2016	RENDICONTI ONLINE SOCIETA GEOLOGICA ITALIANA	41			50	53	10.3301/ROL.2016.90	After more than 25 years since the first studies, the Landscape Master Plan of Liguria has contributed to maintaining the cultural and natural landscape. The current plan is made by three descriptive layouts and related regulations: the settlement and botanical settings represent the features of the landscape linked to buildings and vegetation. The geomorphological layout shows only the regulatio…	Environmental Geology; Engineering Geomorphology; Landscape plan; Geoheritage; Liguria	EASTERN LIGURIA	Web of Science
53	Fancello D., Columbu S., Cruciani G., Dulcetta L., Franceschelli M.	Geological and archaeological heritage in the Mediterranean coasts: Proposal and quantitative assessment of new geosites in SW Sardinia (Italy)	Italy		geosites	8.6528967	39.4724467	2022	Frontiers in Earth Science	10		910990			10.3389/feart.2022.910990	The south-western Sardinian coast (Italy), in the sector between the small village of Chia (Domus de Maria) and the Piscinnì locality (Teulada), is one of the most interesting of the island, being characterized by a wide geodiversity, a complex history testified by several archaeological sites, rich ecosystems, and beautiful landscapes. This area is already famous as a seaside resort, but its ric…	archaeology; geoconservation; geoheritage; geotrail; Punic-Roman quarry; touristic and educational value	archaeology; cultural heritage; geodiversity; landscape; quantitative analysis; seventeenth century; sixteenth century; tourist behavior; village; Italy; Sardinia	Scopus
54	Fassoulas C., Mouriki D., Dimitriou-Nikolakis P., Iliopoulos G.	Quantitative Assessment of Geotopes as an Effective Tool for Geoheritage Management	Greece		geoheritage	25.1049719	35.2040848	2012	Geoheritage	4	3		177	193	10.1007/s12371-011-0046-9	A quantitative methodology for the assessment of geotopes that can be used for the sustainable management and conservation of the geological heritage of an area is here presented. As sustainable development, education and conservation are core issues for the successful management of any protected area, this study focuses on the development of specific indexes necessary for determining values conc…	Assessment; Geoconservation; Geoheritage; Geoparks; Geotopes	conservation management; ecotourism; educational development; geodiversity; heritage conservation; protected area; quantitative analysis; sustainability; sustainable development; tourism development; Aegean Islands; Crete; Greece; Mount Ida; Rethymne	Scopus
55	Fedorov, YA; Mikhailenko, AV; Ruban, DA	Large-Scale Accessibility as a New Perspective for Geoheritage Assessment	Russia		geoheritage	38.468364	44.9483587	2022	GEOSCIENCES	12	11	414			10.3390/geosciences12110414	The exploitation of geoheritage resources depends on their accessibility. The latter is usually established for geosites, whereas reaching the areas where geosites concentrate also deserves attention. Here, a novel, multi-criteria, score-based approach for assessing the large-scale accessibility of geoheritage-rich areas is proposed. The study takes into account various information about external…	geotourism; geosites; infrastructure; research projects; Russian South	GEOCONSERVATION; GEODIVERSITY; GEOTOURISM; EDUCATION; PROPOSAL; TOURISM	Web of Science
56	Fernández A., Fernández T., Pereira D.I., Nieto L.M.	Assessment of Geodiversity in the Southern Part of the Central Iberian Zone (Jaén Province): Usefulness for Delimiting and Managing Natural Protected Areas	Spain		geoconservation	-3.777933	37.7065744	2020	Geoheritage	12	1	20			10.1007/s12371-020-00447-6	To explore the relationship between geodiversity and borders of natural protected areas, we studied the northern part of Jaén Province (southern Spain), where the southern sector of the Central Iberian Massif, the Betic Cordillera and the Guadalquivir foreland basin come together. Moreover, several natural protected areas (NPAs) are located here. To approach the topic, we defined the geodiversity…	Biodiversity; Central Iberian Zone; Geodiversity; Geodiversity index; GIS; Natural protected areas	biodiversity; diversity index; endangered species; environmental assessment; environmental gradient; foreland basin; geodiversity; GIS; index method; nature conservation; protected area; Andalucia; Betic Cordillera; Central Iberian Zone; Guadalquivir River; Iberian Massif; Jaen [Andalucia]; Jaen [Jaen (PRV)]; Spain	Scopus
57	Ferrando A., Faccini F., Paliaga G., Coratza P.	A quantitative gis and ahp based analysis for geodiversity assessment and mapping	Italy		geodiversity evaluation	8.8184357	44.5135681	2021	Sustainability (Switzerland)	13	18	10376			10.3390/su131810376	In recent times, the issues of geodiversity assessment and mapping have been subject of great attention, and many evaluation methodologies, either quantitative or qualitative, have been developed. In this research, a first assessment of geodiversity in the Liguria region has been carried out, according to a quantitative method based on spatial analysis techniques implemented in a GIS environment.…	AHP; Geodiversity; Liguria; Mapping; Quantitative assessment	analytical hierarchy process; assessment method; biodiversity; geodiversity; GIS; mapping method; spatial analysis; Italy; Liguria	Scopus
58	Ferrando A., Faccini F., Paliaga G., Coratza P.	Geosites and geological landscapes of Liguria (Italy)	Italy		geosites	8.288536	44.2873071	2022	Journal of Maps						10.1080/17445647.2022.2145919	Liguria is a small region in Northwestern Italy which is characterized by significant and valuable geoheritage. The 1:250,000 map presented in this paper displays the 120 geosites of Liguria, officially approved by regional and national authorities, framed in the context of the geological landscapes of the region. The geological landscapes were obtained by categorizing and thematizing geological,…	geodiversity; geoheritage mapping; geological landscapes; Geosites; Liguria		Scopus
59	Ferrando A., Faccini F., Poggi F., Coratza P.	Geosites inventory in liguria region (Northern italy): A tool for regional geoconservation and environmental management	Italy		geosites	8.3077621	44.3933824	2021	Sustainability (Switzerland)	13	4	2346	1	19	10.3390/su13042346	The Liguria Region in Northern Italy is characterized by a wide geological and geomor-phological variety, encompassing an important and valuable geoheritage. The Ligurian regional law (L.R. 39/2009) protects and enhances geodiversity and geosites, establishing the Regional Inventory of Geosites; however, an approved official inventory is still lacking. In this work, a first reasoned inventory of …	Geoconservation; Geoheritage; Geosites; Geotourism; Liguria	conservation management; environmental management; geodiversity; heritage conservation; risk assessment; strategic approach; vulnerability; Italy; Liguria	Scopus
60	Gajek, G; Zglobicki, W; Kolodynska-Gawrysiak, R	Geoeducational Value of Quarries Located Within the Malopolska Vistula River Gap (E Poland)	Poland		geosites	21.8300549	50.8612603	2019	GEOHERITAGE	11	4		1335	1351	10.1007/s12371-019-00395-w	Formal and non-formal outdoor learning or field education is the most effective form of interpretation and promotion of geoheritage. Quarries make it possible to look back at the geological past of our planet, and, in many regions, they are the only places where we can observe the exposed bedrock. In E Poland, a considerable number of quarries are located within the area of the Malopolska Vistula…	Education; Geoheritage; Geopark; Quarries	ABANDONED QUARRIES; GEOTOURISM; GEOCONSERVATION; GEOHERITAGE; AMMONITES; EDUCATION; GEODIVERSITY; TAXONOMY; INDUSTRY; GEOSITE	Web of Science
61	García-Cortés A., Rábano I., Locutura J., Bellido F., Fernández-Gianotti J., Martín-Serrano A., Quesada C., Barnolas A., Durán J.J.	Spanish geological frameworks with international significance: Establishment, description and justification according to the IUGS Global Geosites project methodology [Contextos geológicos españoles de relevancia internacional: Establecimiento, descripción y justificación según la metodología del proyecto global geosites de la IUGS]	Spain	no	geotourism	-3.2285997	40.0193763	2000	Boletin Geologico y Minero	111	6		5	38		The Geosites project, initiated by the IUGS Global Geosites Working Group and also supported by UNESCO, aims to produce a global inventory of the Earth's geological heritage. This global inventory requires a systematic methodology, which is based on the selection of geological frameworks with international significance, in every country. These frameworks are topic events, time or regional geotect…	Geoconservation; Geodiversity; Geological heritage; Iberian Peninsula; Spain		Scopus
62	Gil-Márquez J.M., Andreo B., Mudarra M.	Studying hydrogeochemical processes to understand hydrodiversity and the related natural and cultural heritage. The case of Los Hoyos area (South Spain)	Spain		cultural heritage and geodiversity	-4.1842715	37.1602927	2022	Catena	216		106422			10.1016/j.catena.2022.106422	The protection of geodiversity has been gaining interest during the last decades. However, the study of hydrodiversity has been much less developed than other aspects of the geological heritage (lithology, mineralogy, geomorphology, palaeontology). The objective of this work is to help with an inclusive definition of hydrodiversity by assessing its importance as part of geodiversity and how it ca…	Brine groundwater; Hydrodiversity; Hydrogeochemistry; Hydrological heritage; Wetland hydrogeology	biodiversity; cultural heritage; geomorphology; hydrochemistry; hydrogeochemistry; hydrogeology; residence time; Spain	Scopus
63	Giné D.S.	Assessment of geodiversity. Methodological validation at detailed scales [Valoración de la geodiversidad. Validación metodológica en escalas detalladas]	Spain		geodiversity evaluation	1.8561304	41.367377	2014	Revista de Geografia Norte Grande	2014	59		65	82		Geodiversity studies are still rare, do not have a sufficiently developed theoretical or methodological body, and are primarily applied at small scales. The purpose of this paper is to develop and implement a process for assessing geodiversity at detailed scales. To this end, a method based on previous experiences, focused on a trial and error method, supported by an extensive field-work and usin…			Scopus
64	Giordano E., Giardino M., Perotti L., Ghiraldi L., Palomba M.	Following the Tracks of Charlemagne in the Cottian Alps. The Cultural and Geological Heritage of the Franks Trail (Susa Valley, Piemonte, NW Italy)	Italy		cultural heritage and geodiversity	7.0151087	45.1315502	2016	Geoheritage	8	4		293	300	10.1007/s12371-015-0158-8	This paper presents an attempt at the evaluation of the Alpine geoheritage of the Susa Valley (Piemonte region, NW Italy). The area is included in the project for the creation of the ‘Cottian Alps Geopark’, whose application to the European Geoparks Network is in progress. The Susa valley is a unique and great geological section showing all the structures and rocks involved in Alpine orogenesis. …	Cottian Alps; Cultural geology; Franks trail; Geoheritage; Geoparks	cultural heritage; cultural landscape; geodiversity; geotourism; human activity; orogeny; recreational activity; tracking; Alps; Cottian Alps; Italy; Piedmont [Italy]; Susa Valley; Western Alps	Scopus
65	Golijanin, J	RELIEF EVALUATION FOR THE PURPOSES OF RECREATION AND TOURISM - CASE STUDY RAVNA MOUNTAIN AND PALE VALLEY	Bosnia and Herzegovina		geotourism	14.9363235	45.365451	2017	3RD INTERNATIONAL SCIENTIFIC CONFERENCE GEOBALCANICA 2017				67	74	10.18509/GBP.2017.10	Possibility for development of tourism in certain area is affected by relief characteristics as stimulating or limiting factors. Landforms contributions to geodiversity of area by increasing its scientific, educational and recreational-touristic potential. Evaluation of relief for purposes of recreation and tourism in the example of Ravna Mountain and Pale Valley was carried by usage of AHP multi…	relief evaluation; applied geomorphology; AHP method; Bosnia and Herzegovina		Web of Science
66	Golonka J., Krobicki M., Miśkiewicz K., Słomka T., Waśkowska A., Doktor M.	"Silesian-Moravian-Żywiec Beskid" Geopark - The oldest deposits of the Flysch Carpathians [Geopark "Beskid Śla̧sko-Morawsko-Żywiecki" - Najstarsze utwory Karpat fliszowych]	Poland		geoparks	18.9886835	49.7416607	2013	Przeglad Geologiczny	61	5		277	285		The oldest flysch deposits are the leading theme of the planned "Silesian-Moravian-Żywiec Beskid" Geopark The geopark is located in the area of Beskid Śla̧ski Mts. and Beskid Żywiecki Mts. in the territory of Poland. This is a region of the occurrence of a number of tectonic units of the Outer Carpathians, including Pieniny Klippen Belt, Magura Nappe (with Krynica, Bystrica, Rača and Siary tecton…	Flysch; Geoconservation; Geopark; Magura Nappe; Outer Carpathians; Silesian Nappe; Valorization	conservation management; flysch; geodiversity; landform; nappe; park management; Silesian; tectonic setting; tourist attraction; Czech Republic; Poland; Slovakia	Scopus
67	González-Amuchastegui M.J., Serrano E.	An essential tool for natural heritage management: The geomorphological map of Valderejo Natural Park	Spain		geomorphological mapping	-3.2267599	42.8561222	2018	Geosciences (Switzerland)	8	7	250			10.3390/geosciences8070250	This study supports the usefulness of geomorphological mapping as a tool for gaining an understanding of the landscape and assessing natural heritage. Mapping provides an essentially scientific document with great potential for the diffusion of geomorphological knowledge in that it provides a guide to the user of natural protected areas as well as serving as a tool for its management regarding ge…	Geoheritage; Geomorphological mapping; Natural protected areas; Valderejo		Scopus
68	Gordon J.E., Barron H.F.	The role of geodiversity in delivering ecosystem services and benefits in Scotland	Great Britain		ecosystem services	-4.245016	56.7700454	2013	Scottish Journal of Geology	49	1		41	58	10.1144/sjg2011-465	The ecosystem services approach is now a key driver for environmental policy and conservation management both in the UK and globally. Within this, geodiversity provides or underpins many essential provisioning, regulating, cultural and supporting ecosystem services and so it is not only the inherent value of geodiversity that matters, but also its role in ecosystem functioning. Protecting geodive…		adaptive management; biodiversity; climate change; conservation management; ecosystem function; ecosystem service; environmental assessment; environmental policy; geodiversity; service provision; United Kingdom	Scopus
69	Gordon J.E., Brazier V., Hansom J.D., Werritty A.	Advances in quaternary studies and geomorphology in Scotland: Implications for geoconservation	Great Britain		geoconservation	-3.3661098	56.7700454	2019	Earth and Environmental Science Transactions of the Royal Society of Edinburgh	110	2023-02-01		257	278	10.1017/S1755691019000069	Quaternary deposits and landforms are an integral component of Scotland’s geodiversity and natural heritage with intrinsic, scientific, educational, cultural, aesthetic and ecological values. Their conservation is founded on the assessment and safeguard of key protected areas principally for their scientific values. The evaluation of site networks for Quaternary deposits and landforms (including …	Development of geoconservation; Fluvial and coastal geomorphology; Geodiversity; Geoheritage; Geological conservation review; Geosites; Glacial; Mass movements	coastal morphology; fluvial geomorphology; geodiversity; glacial deposit; heritage conservation; mass movement; nature conservation; protected area; Quaternary; Scotland; United Kingdom	Scopus
70	Górska-Zabielska M.	The most valuable erratic boulders in the Wielkopolska region of western Poland and their potential to promote geotourism	Poland		geotourism	16.5191441	52.4484878	2020	Geojournal of Tourism and Geosites	29	2		694	714	10.30892/gtg.29225-500	In the present paper, twelve erratic boulders in the Wielkopolska region of western Poland are described in detail, indicating their Scandinavian source area, location, form of protection, petrographic type and morphology. In particular, special attention is placed on an evaluation of these boulders‘current and potential significance for geotourism with the aim of promoting geotourism. The point …	An inanimate nature monument; Geodiversity; Geological heritage; Geotourism; Scandinavian erratic boulders; Wielkopolska region	geodiversity; geological hazard; geotourism; heritage conservation; Boulder; Colorado; Poland [Central Europe]; Scandinavia; United States; Wielkopolska	Scopus
71	Górska-Zabielska M., Nowicka N., Zawieja J.	Geodiversity of the Drawa National Park, NW Poland [Georóżnorodność i walory geoturystyczne Drawieńskiego Parku Narodowego, NW Polska]	Poland		geotourism	15.9560948	53.0981577	2015	Biuletyn - Panstwowego Instytutu Geologicznego	463			1	42	10.5604/08676143.1185860	This article aims to identify and evaluate geodiversity as well as geotouristic attractiveness of the Drawa National Park (DPN), north-western Poland, including evaluation of individual geosites. As a consequence, the most precious geotouristic values of the DPN are presented. The ranking method of basic fields and geosites was used. Criteria of evaluation of the area included as follows: terrain…	Drawa National Park; Geodiversity; Geotourism; Geovalues; North-western Poland; Protection of geological and geomorphological heritage	accessibility; action plan; contingent valuation; cultural heritage; ecotourism; environmental protection; geodiversity; national park; tourist attraction; Drawa National Park; Poland [Central Europe]	Scopus
72	Guerra V., Lazzari M.	Geoheritage Assessment and Potential Geotouristic Enhancement in Mountain Environments: a Test-Site in the Northern Apennines (Italy)	Italy		geotourism	9.7469959	44.3683074	2022	Geoheritage	14	3	97			10.1007/s12371-022-00729-1	This work proposes an integrated methodology to inventory and quantitatively assess the geosites located in a mountain context of northern Apennines. The geological and geomorphological heritage and the historical, cultural, and religious heritage produce a complex cultural landscape. Such a context is expressed sometimes through monumental examples and other times through hidden or invisible poi…	Geodiversity; Geoheritage assessment; Geomorphology; Georoutes; Geosite; Geotourism	methodology; Apennines; Badia; Emilia-Romagna; Florence; Italy; Italy; Rimini; Tuscany	Scopus
73	Guerra V., Lazzari M.	Geomorphological mapping as a tool for geoheritage inventory and geotourism promotion: A case study from the middle valley of the Marecchia River (northern Italy) [La cartographie géomorphologique comme outil d'inventaire du géopatrimoine et de promotion du géotourisme: une étude de cas dans la moyenne vallée du fleuve Marecchia (Italie du Nord)]	Italy		geotourism	12.4270562	44.02155	2021	Geomorphologie: Relief, Processus, Environnement	27	2		127	145	10.4000/GEOMORPHOLOGIE.15193	The aim of this paper is to present the geomorphological map of the right side of the middle Marecchia valley, in the northern Apennines (Italy), as a basis to enhance the geotouristic potential of the area. This area has been chosen because it is representative of the geological, geomorphological and geodynamic context characterizing the whole Marecchia basin, where a massive allochthonous body …	Geomorphology; Geosites; Geotourism; Marecchia River valley; Northern Apennines		Scopus
74	Henriques M.H., Pena dos Reis R., Garcia G.G., João P., Marques R.M., Custódio S.	Developing paleogeographic heritage concepts and ideas through the Upper Jurassic record of the Salgado and Consolação geosites (Lusitanian Basin, Portugal)	Portugal		education	-8.2169468	41.0533734	2022	Resources Policy	76		102594			10.1016/j.resourpol.2022.102594	The Salgado and Consolação geosites are located on the Portuguese coast of the West Iberian Margin and represent two Upper Jurassic reference sections of the Amaral Formation interpreted as a barrier-lagoon depositional environment within a mixed carbonate platform context. Outcrops exposure and access conditions allow the detailed study of the succession, as well as its use as a geotourism targe…	Lusitanian Basin (Portugal); Paleogeographic geoheritage; Qualitative assessment; Salgado and Consolação geosites; Upper Jurassic	Geosites; Jurassic; Lusitanian basin (portugal); Lusitanian basins; Paleogeographic geoheritage; Portugal; Portuguese coast; Qualitative assessments; Salgado and consolacao geosite; Upper jurassic; Geology; carbonate platform; conceptual framework; conservation status; depositional environment; environmental education; geological record; Jurassic; paleogeography; Atlantic Ocean; Brazil; Iberian M…	Scopus
75	Herrera D.C., Martínez-Murillo J.F.	Geodiversity assessment of the sierras subbeticas natural park and geopark (Córdoba, south of Spain) [Valoración de la geodiversidad del parque natural y geoparque de las sierras subbéticas (Córdoba, sur de España)]	Spain		geodiversity evaluation	-4.99969	38.0331291	2020	Cuaternario y Geomorfologia	34	2023-02-01		5	22	10.17735/CYG.V34I1-2.75529	The Sierras Subbéticas Natural Park became member of the European Network of Geoparks and UNESCO in 2006 and 2015, respectively. This was possible owing to its richness in fossils (ammonitico rosso facies, rich in ammonites) and to the presence of very good examples of endo-and exokarstic morphologies. The geodiversity valuation is a key issue for geoparks in order to know well its spatial variab…	Assessment; Geodiversity; Geopark; Quantitative method; Subbéticas		Scopus
76	Hjort J., Luoto M.	Geodiversity of high-latitude landscapes in northern Finland	Finland		geodiversity evaluation	26.8059571	66.5236106	2010	Geomorphology	115	2023-02-01		109	116	10.1016/j.geomorph.2009.09.039	Geodiversity is a rather new, emerging topic in earth science. There is now increased awareness of our need to understand patterns of geodiversity in different landscapes facing global change. In this study, we systematically inventoried geodiversity and topographical parameters in an area of 285 km2 in subarctic Finland. We quantified the spatial variation of geodiversity using four different me…	Biodiversity; Geodiversity; Geomorphological mapping; Grid approach; Landscape scale; Subarctic	biodiversity; geomorphological mapping; landscape evolution; soil erosion; spatial variation; subarctic region; topography; Finland	Scopus
77	Hooke, JM; Smith, MJ	'The Physical Landscape of Britain and Northern Ireland': A Project to Increase Geomorphological Awareness	Great Britain	no	education	-6.5924804	54.8409688	2012	SCOTTISH GEOGRAPHICAL JOURNAL	128	3-4		298	303	10.1080/14702541.2012.725856	A project has been initiated that will produce an interactive website searchable by maps and database terms, aimed at increasing knowledge and awareness of the geodiversity, landforms and processes of Britain and Northern Ireland. It has the following objectives: (1) to make existing knowledge on the physical landscape and geomorphology of Britain more widely accessible; (2) to increase knowledge…	geodiversity; website; knowledge exchange		Web of Science
78	Hubert I., Reynard E., Carcaud N.	Make the geodiversity of the Grenoble region visible and overcome the urban / mountain divide through the prism of landscape and its representations [Donner à voir la géodiversité de la région grenobloise et dépasser le clivage ville / montagne à travers le prisme du paysage et de ses représentations]	France		education	5.5591922	45.1052361	2019	Geomorphologie: Relief, Processus, Environnement	25	4		233	252	10.4000/GEOMORPHOLOGIE.13701	It is customary to consider that geodiversity and landscape are less attractive in cities than in mountains. In the socalled alpine cities, myths are crystallized around these two figures, which are thought to be antagonistic, while they bear witness to a common geohistory. These cities were built in spite of the mountainous massifs and thanks to their resources. Grenoble, a self-proclaimed alpin…	Alpine city; Geodiversity; In-between; Landscape; Photograph; Transect		Scopus
79	Ibáñez J.J., Pérez-Gómez R., Ganis P., Feoli E.	The use of vegetation series to assess α and β vegetation diversity and their relationships with geodiversity in the province of Almeria (Spain) with watersheds as operational geographic units	Spain		biodiversity and geodiversity	-2.5836903	36.9321353	2016	Plant Biosystems	150	6		1395	1407	10.1080/11263504.2016.1165755	With this paper we suggest that vegetation series is a useful conceptual tool to identify a clear level of biodiversity of land systems among the many possible logical levels. The suggestion is supported by the results of a case study carried out for the province of Almeria (Spain) using the watersheds as operational geographic units. The application of standard correlation analysis, simple and p…	data mining; knowledge generation; Mantel; nestedness; partial correlation; pedodiversity; Simpson		Scopus
80	Jankowski P., Najwer A., Zwoliński Z., Niesterowicz J.	Geodiversity assessment with crowdsourced data and spatial multicriteria analysis	Poland		geodiversity evaluation	14.8944019	53.7246272	2020	ISPRS International Journal of Geo-Information	9	12	716			10.3390/ijgi9120716	This paper presents an approach to geodiversity assessment based on spatial multicriteria analysis. Instead of relying solely on weighted linear combination (WLC) for aggregating factor ratings and weights to compute a synthetic measure of geodiversity, the approach employs WLC in concert with its local version called L-WLC to provide a more comprehensive assessment approach. As part of the appro…	Crowdsourcing; Geodiversity assessment; Spatial multicriteria analysis; Uncertainty analysis		Scopus
81	Kasiński J.R., Kozdrój W., Koźma J., Krentz O., Opletal M., Stachowiak A.	Geological Map Lausitz-Jizera-Karkonosze and Muskau Arch Geopark as examples of cross-border cooperation of the national geological surveys of Poland, the Czech Republic and Germany	Poland		geoparks	15.9930347	50.8218581	2004	Przeglad Geologiczny	52	8 II		724	730		The article presents the cross-border cooperation of geologists from the Lower Silesian Branch of Polish Geological Institute and the national geological surveys of the Czech Republic and Germany. The current cooperation is discussed on the basis of Geological Map Lausitz-Jizera-Karkonosze as well as on geological research of the Muskau Arch. The Geological Map Lausitz-Jizera-Karkonosze, in 1 : 1…	Bohemian Massif; Cadomian and Variscan orogenesis; Epi-Variscan cover; Geodiversity conservation; Geological map; Geopark; Geotectonic evolution; Geotope; Glaciotectonics; Goetourism; Muskau Arch	geological mapping; international cooperation; Central Europe; Czech Republic; Eurasia; Europe; Germany; Poland	Scopus
82	Kidová A., Radecki-Pawlik A., Rusnák M., Plesiński K.	Hydromorphological evaluation of the river training impact on a multi-thread river system (Belá River, Carpathians, Slovakia)	Slovakia		hydrodiversity	19.8761407	49.0792701	2021	Scientific Reports	11	1	6289			10.1038/s41598-021-85805-2	The paper evaluates the impact of river training works designed to address problems associated with flooding on the braided-wandering Belá River in Slovakian Carpathians. This impact was investigated after the flood event in July 2018 on 11 river reaches where the river engineering and management intervention was applied. We analyzed its impact by spatio-temporal variations in river morphology (1…		article; decision making; floodplain; flow rate; human; shear stress; Slovakia; stream (river)	Scopus
83	Kirchner K., Kubalíková L.	Geosite and geomorphosite assessment for geotourism purpose: A case study from the vizovická vrchovina highland, eastern moravia	Czechia		geotourism	17.819861	49.1818398	2014	Public Recreation and Landscape Protection - With Man Hand in Hand? 2014 Conference Proceeding				121	128		Geotourism can be understood at a broader sense as geographical tourism sustaining environment, culture, aesthetics, heritage and the well-being of residents of a place or in a more restricted sense as a form of nature tourism that specifically focuses on landscape and geology. Geological, geomorphological and pedological sites are the most important resource for the geotourism activities. It is …	Geodiversity; Geoheritage; Numerical assessment; Outer western carpathians	Environmental protection; Geology; Regional planning; Assessment criteria; Assessment methodologies; Geodiversity; Geoheritage; Numerical assessment; Real values; Well being; Western carpathians; Numerical methods	Scopus
84	Kirchner, K; Kubalikova, L; Bajer, A	LOCAL GEOHERITAGE: ITS IMPORTANCE AND POTENTIAL FOR GEOTOURIST AND RECREATIONAL ACTIVITIES (A CASE STUDY FROM LOMNICKO AREA)	Czechia		geotourism	16.4642715	49.3892503	2017	PUBLIC RECREATION AND LANDSCAPE PROTECTION - WITH NATURE HAND IN HAND?, 2017				202	211		Geodiversity, respectively its valuable part geoheritage is considered an important resource for the geotourism and recreation purposes. In the Czech Republic, there are a lot of examples of such use of geoheritage: sandstone rock cities (e.g. Elbe Sandstones), karst areas (e.g. Moravian Karst) or polygenetic relief at mountain areas (e.g. Krkonose Mts.) and others. These geoheritage features are…	geodiversity; geosite; geomorphosite; geotourism	GEOMORPHOSITE ASSESSMENT	Web of Science
85	Kirchner, K; Kubalikova, L; Machar, I	ASSESSMENT OF ANTHROPOGENIC LANDFORMS FOR THE GEOTOURISM PURPOSES (CASE STUDY: VELKE OPATOVICE FORTIFICATION SITE, ARCHDIOCESE OF OLOMOUC, CZECH REPUBLIC)	Czechia		geotourism	16.6802532	49.6097159	2018	PUBLIC RECREATION AND LANDSCAPE PROTECTION - WITH NATURE HAND IN HAND!				61	68		The human impact on the relief is often very devastating: natural landforms are modified, damaged or destroyed and the intensity of human-induced processes even surpasses the natural ones. However, people also create new landforms which are interesting from geoconservation, educational, cultural and historical points of view. Thanks to these aspects, they also have a potential for geotourism, geo…	geo(morpho)sites; geoeducation; recreation; cultural heritage; Archdiocese of Olomouc	GEOMORPHOSITE ASSESSMENT; SECONDARY GEODIVERSITY; BRNO CITY; TOOL	Web of Science
86	Kirchner, K; Kuda, F; Kubalikova, L; Havlicek, M; Machar, I; Pechanec, V	CULTURAL HERITAGE AND GEODIVERSITY OF LANDFORMS IN THE LANDSCAPE OF THE ARCHDIOCESE OF OLOMOUC	Czechia		cultural heritage and geodiversity	17.1303494	49.5842364	2018	USEFUL GEOGRAPHY: TRANSFER FROM RESEARCH TO PRACTICE				165	172		Within the framework of the NAKI II project - Cultural heritage of landscape of the Archdiocese of Olomouc - research, presentation and management (DGB 16P02B014), we focus on the results that will contribute to the sustainable development of regional cultural identity through applied cultural heritage research in the cultural landscape of the area of interest. As part of the material cultural he…	cultural heritage; secondary geodiversity; Archdiocese of Olomouc	LAND-USE	Web of Science
87	Knapik R., Migoń P.	Karkonosze National Park with its buffer zone certified as the National Geopark [Karkonoski Park Narodowy z otulina̧ jako geopark krajowy]	Poland		geoparks	15.7158596	50.7731688	2010	Przeglad Geologiczny	58	11		1065	1069		The Certificate of National Geopark for the Karkonosze National Park with its buffer zone refects the policy of the Ministry of Environment, which aims to create a network of national geoparks in Poland. It is also a consequence of conducting by the Karkonosze National Park the project "Geosiles inventory and assessment in the Karkonosze National Park and its bujferzone, including preparation of …	Geodiversity; Geoeducation; Geosites; Karkonosze Mts	biodiversity; buffer zone; environmental change; geodiversity; national park; paleoenvironment; Karkonosze Mountains; Sudetes	Scopus
88	Knapik R., Migoń P., Szuszkiewicz A., Aleksandrowski P.	Karkonosze geopark - Geodiversity and geotourism [Geopark Karkonosze - Georóżnorodność i geoturystyka]	Poland		geoparks	15.6059964	50.7957433	2011	Przeglad Geologiczny	59	4		311	322		The Certificate of a National Geopark was awarded to the Karkonosze National Park, along with its buffer zone, in September 2010. Geodiversity of the Karkonosze Mountains, subject to the comprehensive assessment in 2008-2009, resides mainly in the variety of geological, mineralogical and geomorphological phenomena. In addition, the legacy of mining and mineral prospecting is abundant. Many of the…	Geosites; Karkonosze national park; Nature protection	cultural heritage; mining; national park; nature conservation; tourism development; tourism economics; tourism market; tourist attraction; tourist destination; Karkonosze Mountains; Sudetes	Scopus
89	Kot R.	A comparison of results from geomorphological diversity evaluation methods in the Polish Lowland (Toruń Basin and Chełmno Lakeland)	Poland		geomorphological mapping	18.4813526	53.2017783	2018	Geografisk Tidsskrift - Danish Journal of Geography	118	1		17	35	10.1080/00167223.2017.1343673	Geomorphological diversity is part of geodiversity. Study and evaluation of geodiversity, including geomorphological diversity, is often conducted in uplands and mountains, despite the fact that lowland areas are of equal importance. This paper evaluates geomorphological diversity in a small area of the Polish Lowland, using a variety of methods that have been applied in recent times for evaluati…	abiotic ecosystem services; Geodiversity; geomorphological diversity evaluation; Polish Lowland; relief diversity	ecosystem service; geodiversity; geomorphology; lowland environment; mapping; mountain region; topography; upland region; Poland [Central Europe]; Polish Lowlands	Scopus
90	Kot R.	The point bonitation method for evaluating geodiversity: A guide with examples (Polish Lowland)	Poland		geodiversity evaluation	17.3113087	53.1705081	2015	Geografiska Annaler, Series A: Physical Geography	97	2		375	393	10.1111/geoa.12079	This paper presents the evaluation of geodiversity by the point bonitation method. Geodiversity is understood here in the broadest sense, i.e. as a variability of all abiotic components: geology, geomorphology, soils, waters and climate. The point bonitation method is described in the form of a coherent instruction along with a discussion of the included examples. Factors that may influence the o…	Geodiversity evaluation; Point bonitation method; Polish Lowland; Spatial geodiversity		Scopus
91	Kot R., Leśniak K.	Impact of different roughness coefficients applied to relief diversity evaluation: Chełmno lakeland (Polish Lowland)	Poland		geodiversity evaluation	18.5281618	53.2960976	2017	Geografiska Annaler, Series A: Physical Geography	99	2		102	114	10.1080/04353676.2017.1286547	The study deals with the use of geodiversity indices for relief diversity evaluation in lowlands (exemplified by the Polish Lowland). These indices involve three parameters: the number of relief types (n), the number of patches (m) and the roughness coefficient (r). The considered indices take the form of V(n,m) x r, where V is one of the six real-valued functions increasing with respect to n and…	Geodiversity index; Kendall’s tau-b rank correlation; Lowland; Relief diversity; Roughness coefficient	correlation; fragmentation; geodiversity; impact; lowland environment; relief; roughness; Poland [Central Europe]; Polish Lowlands	Scopus
92	Krawiec A., Wysocki W., Jamorska I., Belzyt S.	Geoturist Evaluation of Geosites in the Tuchola Forest Biosphere Reserve (N Poland)	Poland		geotourism	17.9118039	53.5695843	2022	Resources	11	2	13			10.3390/resources11020013	The geotourist evaluation of 32 geosites, including mineral deposits occurrence (1), petrological (12), sedimentological (2), and geomorphological (9), as well as hydrological and hydrogeological (8) sites, located in the area of Tuchola Forest Biosphere Reserve (TFBR), has been carried out. The study aims to provide a qualitative assessment of geodiversity via the evaluation of abiotic nature ob…	Biodiversity and geodiversity; Geoheritage; Geotourist valorization; Postglacial landscape; Young glacial landscape		Scopus
93	Kubalíková L.	Assessing geotourism resources on a local level: A case study from Southern Moravia (Czech Republic)	Czechia		geotourism	16.9813553	49.1485589	2019	Resources	8	3	150			10.3390/resources8030150	In the last decades, the geotourism has shown a considerable growth all over the world and it is appreciated and accepted as a useful tool for promoting natural and cultural heritage and for fostering local and regional economic development, especially within rural areas. Geotourism focus especially on the geological and geomorphological aspects of the landscape; however, according to the current…	Geodiversity; Geomorphosites; Rural regions; SWOT analysis		Scopus
94	Kubalíková L.	Cultural ecosystem services of geodiversity: A case study from Stranska skala (Brno, Czech Republic)	Czechia		ecosystem services	16.5583816	49.188067	2020	Land	9	4	105			10.3390/land9040105	The concept of ecosystem services developed in the second half of the 20th century, and the Millennium Ecosystem Assessment was crucial for its acceptance. This assessment identified the services that ecosystems provide to society, but geodiversity (as an indispensable component of ecosystems) was somewhat underestimated. At present, geodiversity is intensively used by human society and it provid…	Abiotic ecosystem services; Geoconservation; Geocultural site; Geoheritage; Geotourism		Scopus
95	Kubalíková L., Balková M.	Two-level assessment of threats to geodiversity and geoheritage: A case study from Hády quarries (Brno, Czech Republic)	Czechia		risk assessment	16.6902176	49.1916571	2023	Environmental Impact Assessment Review	99		107024			10.1016/j.eiar.2022.107024	Geoconservation is an action of conserving and enhancing geological, geomorphological, hydrological and soil features and processes, sites and specimens. Originally and usually, the geoconservation activities aim at preserving specific sites of Earth Sciences interest, respectively geoheritage. However, for effective and sustainable management of geodiversity and geoheritage, it is necessary to t…	Czechia; Geoconservation; Geodiversity; Geoheritage; Hády quarries; Risk analysis; Site assessment methodology	Quarries; Risk assessment; Soil conservation; Assessment methodologies; Case-studies; Czechium; Geoconservation; Geodiversity; Geoheritage; Hady quarry; Site assessment; Site assessment methodology; Threat assessment; Risk analysis	Scopus
96	Kubalíková L., Kirchner K., Kuda F.	VIEWPOINT GEOSITES AND THEIR POTENTIAL FOR GEOEDUCATION AND GEOTOURISM	Czechia		education	15.9772644	48.833062	2022	Public Recreation and Landscape Protection - With Environment Hand in Hand… Proceedings of the 13th Conference				440	445	10.11118/978-80-7509-831-3-0440	Viewpoint geosites are locations which allow observation of the surrounding landscape and comprehension of geodiversity (or Earth history recorded in rocks, structures and landforms) visible from this locality. The sites themselves don‘t have to be attractive from the Earth-sciences point of view, so they may be both natural (e.g. rock outcrops, mountain tops) and man-made objects (e.g. watchtowe…	Assessment; Geodiversity; Inventory; Landscape; Viewshade analysis	Environmental protection; Assessment; Geodiversity; Geosites; Geotourism; Inventory; Landscape; Man made objects; National parks; Rock structures; Viewshade analyse; Regional planning	Scopus
97	Kubalíková L., Kirchner K., Kuda F., Bajer A.	Assessment of Urban Geotourism Resources: An Example of Two Geocultural Sites in Brno, Czech Republic	Czechia		geotourism	16.6002978	49.161294	2020	Geoheritage	12	1	7			10.1007/s12371-020-00434-x	Geodiversity and geoheritage within urban areas have some specific characteristics in comparison to those in natural and rural areas. They influence and are influenced by urban development, they are strongly modified by human activities and they are usually closely related to the culture, architecture and history (cultural heritage). Geoheritage (especially geosites or geoheritage ex situ) is the…	Brno; Czech Republic; Geocultural site; SWOT analysis; Urban geotourism	cultural heritage; education; geotourism; guideline; human activity; sustainable development; urban area; Brno; Czech Republic; Jihomoravsky	Scopus
98	Kubalikova, L; Kirchner, K; Kuda, F; Machar, I	The Role of Anthropogenic Landforms in Sustainable Landscape Management	Czechia		sustainability	16.6552295	49.1594978	2019	SUSTAINABILITY	11	16	4331			10.3390/su11164331	Anthropogenic landforms are attractive landscape structures. They are linked to the cultural elements of the landscape and they also support biodiversity on the landscape level. Concerning their position within heritage concepts, anthropogenic landforms can be seen as a bridge between natural and cultural heritages. This paper is focused on the relevance of anthropogenic landforms to landscape ma…	assessment; geomorphosites; sustainable tourism; conservation; Brno; Czech Republic	DECISION-SUPPORT TOOL; GEOTOURISM PURPOSES; ABANDONED QUARRIES; EASTERN PART; GEOCONSERVATION; GEOMORPHOSITES; GEOHERITAGE; CONSERVATION; HERITAGE; GEODIVERSITY	Web of Science
99	Kubalikova, L; Zapletalova, D	Geo-Cultural Aspects of Building Stone Extracted Within Brno City (Czech Republic): a Bridge Between Natural and Cultural Heritage	Czechia		cultural heritage and geodiversity	16.5206469	49.1594978	2021	GEOHERITAGE	13	3	78			10.1007/s12371-021-00585-5	Building stone, its deposits, its extraction, and its use represents an element that may be considered a bridge between cultural and natural heritage of a given area. The research on building materials includes numerous aspects such as geological and geomorphological settings of the deposits, cultural aspects, overlaps with geoconservation efforts and urban geotourism development. The case study …	Building stone; Crinoidea Limestone; Old Red Sandstone and Conglomerate; Geotourism; Geoeducation; Heritage	GEODIVERSITY; GEOHERITAGE	Web of Science
100	Lucchesi S., Gianotti F., Giardino M.	The morainic amphitheatre environment: A geosite to rediscover the geological and cultural heritage in the examples of the Ivrea and Rivoli-Avigliana Morainic Amphitheatres (NW Italy)	Italy		geosites	7.822708	45.4844894	2015	Engineering Geology for Society and Territory - Volume 8: Preservation of Cultural Heritage				245	249	10.1007/978-3-319-09408-3_41	The Ivrea Morainic Amphitheatre (IMA), at the Aosta Valley outlet, and the Rivoli-Avigliana Morainic Amphitheatre (RAMA), at the Susa Valley outlet, are the two main and well preserved Pleistocene end moraine systems of the North-Western Italian Alps. These two morainic amphitheatres are geosites containing high environmental, naturalistic, landscape and cultural values. The comparison between th…	Cultural landscape; Geoheritage; Geosites; Ivrea morainic amphitheatre; Rivoli-Avigliana amphitheatre	Engineering geology; Geotechnical engineering; Cultural landscape; Geoheritage; Geosites; Ivrea morainic amphitheatre; Rivoli-Avigliana amphitheatre; Geology	Scopus
101	Ludwikowska-Kędzia M., Wiatrak M.	The geotourist attractiveness of łagowica river valley (holy cross mountains, Poland) – A project of a geotourist trail	Poland		geotourism	21.0611264	50.7911359	2020	Geojournal of Tourism and Geosites	32	4		1337	1346	10.30892/GTG.32422-578	Geotourist evaluation of thirteen small geological, geomorphological and mining heritage objects was carried out in a small valley of the Upper Łagowica River and in its surroundings (Holy Cross Mountains, Poland). The point grading method was used, which is functional in the case of evaluation of small geotourist objects. It was shown that the analysed objects are characterized by high and mediu…	Fluvial valley; Geotourist attractiveness; Geotrail; Holy Cross Mts; Poland	geodiversity; geomorphology; geotourism; heritage tourism; mining; tourist attraction; Poland [Central Europe]; Swietokrzyskie; Swietokrzyskie Mountains	Scopus
102	Machnik, A; Miedzinska, I	Geodiversity as a base of landscape evaluation and management (case: Slawskie Lakeland)	Poland		geodiversity evaluation	16.2298129	51.9435974	2001	EKOLOGIA-BRATISLAVA	20			289	301		Landscape evaluation and management problem results from out of necessity to define landscape structure e.g. in aspect characteristic tourism potential. As a main basic research established principle of proper landscape evaluation, management and protection. It is available by identifying so-called geodiversity, coordinated with biodiversity and abiotical components. In this study accept, that ba…			Web of Science
103	Maia M., Nogueira P., Mirão J., Noronha F.	Geodiversity Assessment Through the Évora–Montemor-o-Novo Region: on the Scope of Valorising the Mining Heritage of the Ossa-Morena Zone (SW Iberia, Portugal)	Portugal		geodiversity evaluation	-8.1870189	38.6161816	2022	Geoheritage	14	3	90			10.1007/s12371-022-00728-2	The SW of Iberia registers diverse examples of mining remnants from activities that ceased during the twentieth century, namely in the Ossa-Morena Zone. Such activities exposed outcrops that are part of the mining heritage of the Alentejo region (Portugal), and examples of that are found throughout the Évora–Montemor-o-Novo region at the ancient Montemor-o-Novo iron mines. GeSologically, the area…	Geodiversity assessment; Mining heritage; Ossa-Morena Zone; SW Iberia	geodiversity; Hercynian orogeny; industry; mineral resource; mining; Alentejo; Iberian Peninsula; Montemor o Novo; Portugal; Portugal	Scopus
104	Manyuk, VV	Geological heritage as an integral part of the Nature Reserve Lands of Kharkiv oblast	Ukraine		geoconservation	36.4591203	49.7855325	2016	JOURNAL OF GEOLOGY GEOGRAPHY AND GEOECOLOGY	24	1		71	81	10.15421/111611	The paper looks at the structural tectonic location of Kharkiv oblast, its geological and geomorphological structure, which form the underlying features of nature's variety and beauty, the development of the Nature Reserve Lands (NRL) of the region, the rich potential of the region's natural complexes and objects, which have conservation, scientific, aesthetic, recreational and other values. It i…	geosite; geodiversity; ecological network; monitoring; geology		Web of Science
105	Manyuk, VV	Hercynian folded structures in the valley of the Mokra Volnovaha River as the basis of a Geological park at the border of the Donbas and the Ukrainian Shield	Ukraine		geoparks	37.5083146	47.6920292	2020	JOURNAL OF GEOLOGY GEOGRAPHY AND GEOECOLOGY	29	2		351	363	10.15421/112031	The basin of the Mokra Volnovaha River, from the Mykolaivka village to the place where it flows into the Kalmius River, exposes an extremely informative geological cross-section of the conjunction of the Pryazov block of the Ukrainian Shield (US) with the complexly located Donetsk Hercynian structure. The results of the survey of this area are presented and the perspectives for creation of the Ma…	geopark; Devonian system; geotourism; Atrhaeopteris; Mokra Volnovaha; paleovolcano; melange; geodiversity		Web of Science
106	Marcisz M., Gawor Ł., Kobylańska M.	Valorization of geotourist and geoheritage objects in the region of Mikołów (USCB, southern Poland) [Waloryzacja obiektów GEoTURystycznych i dziedziCTwa GEologiczNEGo w REjonie Mikołowa (GZW, poŁUdniowa PoLSka)]	Poland		geotourism	18.8622242	50.1775862	2022	Gospodarka Surowcami Mineralnymi / Mineral Resources Management	38	1		189	210	10.24425/gsm.2022.140609	Skilful preservation of the cultural landscape on the basis of post-industrial facilities, including post-mining facilities and geoheritage objects, may contribute to a positive change in the functiona-lity of abandoned or degraded sites. The article presents selected geological, geomorphological and anthropogenic objects in the vicinity of Mikołów (central part of the USCB, southern Poland). The…	geoheritage; geotourist valorization; Mikołów; mining heritage; usCB		Scopus
107	Marjanovic, M; Radivojevic, AR; Antic, A; Peppoloni, S; Di Capua, G; Lazarevic, J; Markovic, RS; Tomic, N; Milicevic, AL; Langovic, Z; Misic, I; Markovic, SB	Geotourism and geoethics as support for rural development in the Knjazevac municipality, Serbia	Serbia		sustainability	22.2676563	43.5492533	2022	OPEN GEOSCIENCES	14	1		794	812	10.1515/geo-2022-0388	The main goal of this study is to emphasise the geotourism potential and the values of geoethics as drivers of rural development in the territory of the Knjazevac municipality, which is one of the richest areas in Serbia in terms of geoheritage. Numerous objects of geomorphological and hydrological heritage stand out in an area of 1,202 km(2). Despite this richness in geoheritage, the potential o…	geoheritage management; East Serbia; modified geosite assessment model; sustainability; geodiversity protection; regional development	BARANICA CAVE; STARA PLANINA; M-GAM; GEOPARKS; GEOCONSERVATION; GEOHERITAGE; MOUNTAIN; RODENTIA; HERITAGE; TOURISM	Web of Science
108	Marjanović M., Tomić N., Radivojević A.R., Marković S.B.	Assessing the Geotourism Potential of the Niš City Area (Southeast Serbia)	Serbia		geotourism	21.9012558	43.2931316	2021	Geoheritage	13	3	70			10.1007/s12371-021-00597-1	The turbulent geological past of the southeastern part of Serbia, along with the influence of the Nišava River, has created a rich and complex geodiversity. However, the geotourism potential of this area remains fully unrevealed. This paper proposes an inventory of geosites in the Niš City area (southeast Serbia) and analyses them to reveal which geosite possesses the greatest geotourism potentia…	Assessment; Geoheritage; Geotourism; M-GAM; Niš; Serbia	geological structure; geotourism; tourism development; tourism management; Nis; Serbia	Scopus
109	Marsico A., Sabato L., Spalluto L., Infante M., Nitti A.	Integrated Geological and Digital Surveys to Know, Preserve and Promote a Geoheritage: the Sea Cliff of Vignanotica Bay (Gargano Promontory, Southern Italy)	Italy		geoheritage	16.0479889	41.7594899	2016	Geoheritage	8	4		371	380	10.1007/s12371-016-0179-y	The sea cliff of Vignanotica Bay (Gargano Promontory, Southern Italy) is a site that, for its peculiar geological features, can be considered a witness of geodiversity and that, as such, should be evaluated as geosite. Since it is necessary to first know, then enhance, and finally protect a geosite, here we propose a modern method of study aimed at the understanding and dissemination of geologica…	3D model; Carbonate sea cliff; Facies analysis; Gargano Promontory; Geosite; Terrestrial Laser Scanner	cliff; facies analysis; geodiversity; geological survey; laser method; marine environment; microfacies; slumping; stratigraphy; three-dimensional modeling; World Heritage Site; Foggia; Gargano National Park; Gargano Promontory; Italy; Puglia	Scopus
110	Martínez-Graña A.M., Goy J.L., Cimarra C.A.	A virtual tour of geological heritage: Valourising geodiversity using google earth and QR code	Spain		geoheritage	-5.9595018	40.4053947	2013	Computers and Geosciences	61			83	93	10.1016/j.cageo.2013.07.020	When making land-use plans, it is necessary to inventory and catalogue the geological heritage and geodiversity of a site to establish an apolitical conservation protection plan to meet the educational and social needs of society. New technologies make it possible to create virtual databases using virtual globes - e.g., Google Earth - and other personal-use geomatics applications (smartphones, ta…	Augmented reality; Geological heritage; Google Earth; KML; QR code; Virtual tour	Geological heritages; Google earths; KML; QR codes; Virtual tour; Augmented reality; Markup languages; Mobile devices; Software packages; Surveying; Education; cultural heritage; database; digital terrain model; geodiversity; photograph; topographic mapping; virtual reality; World Wide Web	Scopus
111	Martinez-Graña A.M., Goy J.L.G.Y., Cardeña C.Z.	Natural heritage mapping of the las batuecas-sierra de Francia and Quilamas nature parks (SW Salamanca, Spain)	Spain		geoheritage	-6.0803514	40.5641579	2011	Journal of Maps	7	1		600	613	10.4113/jom.2011.1172	Natural heritage mapping is a significant tool for the conservation of protected natural areas because it allows the manager to rationally plan for the human use of these areas. This approach incorporates the characteristics of different assets (geological, ecological, biological, scenic and cultural), the categories to which the assets belong (areas, places and things), and the scientific, educa…			Scopus
112	Martins B., Pereira A.	Residents’ perception and assessment of geomorphosites of the Alvão—Chaves region	Portugal		geomorphological mapping	-7.6289946	41.6876196	2018	Geosciences (Switzerland)	8	10	381			10.3390/geosciences8100381	This work focuses on the paradigms of a multidimensional and interdisciplinary evaluation of geomorphological heritage and its valorisation within a geosystemic reading of relations between a geomorphological and cultural landscape. This research aims to (i) select geomorphosites at different scales, which represent the regional geodiversity, according to an interdisciplinary approach; and (ii) b…	Geo-heritage assessment; Geo-heritage perception; Geodiversity; Geomorphosites; North of portugal		Scopus
113	Melelli, L	Perugia Upside-Down: A Multimedia Exhibition in Umbria (Central Italy) for Improving Geoheritage and Geotourism in Urban Areas	Italy		geotourism	12.3892505	43.0998909	2019	RESOURCES-BASEL	8	3	148			10.3390/resources8030148	Multimedia materials represent a promising approach to the promotion of geoheritage. Despite geology being normally associated with natural environments, new tendencies are noted towards better knowledge of the geological reason for the selection of a location and the development of urban settlements. The urban environment is, in fact, a perfect laboratory for opening the scientific topics to a b…	geotourism; geoheritage; urban geology	HAZARD ASSESSMENT; GEOSITES; GEODIVERSITY; APENNINES; HERITAGE; ROME; CITY; GEOMORPHOSITES; MANAGEMENT; EXPOSURE	Web of Science
114	Michalik-Śnieżek M., Chmielewski S., Chmielewski T.J.	An introduction to the classification of the physiognomic landscape types: methodology and results of testing in the area of Kazimierz Landscape Park (Poland)	Poland		geodiversity evaluation	21.928779	51.3039583	2019	Physical Geography	40	4		384	404	10.1080/02723646.2018.1551009	The publication of the European Landscape Convention (2000) had a stimulating effect on the development of both new systems of landscape classification and new methods of their evaluation and mapping. As an example, a new classification of physiognomic landscape types was developed in Poland in 2014. The objectives of the paper are to (1) popularize, on the international scale, the classification…	basic landscape units; Kazimierz Landscape Park (KLP); Landscape classification; landscape diversity; physiognomic landscape types	geodiversity; land classification; mapping method; park management; protected area; Kazimierski Landscape Park; Lubelskie; Poland [Central Europe]	Scopus
115	Miśkiewicz K., Jan G., Waśkowska A., Doktor M., Slomka T.	Flysch Carpathians and their mineral waters cross-border geopark [Transgraniczny geopark Karpaty fliszowe i ich wody mineralne]	Poland		geoparks	21.1707223	49.5688213	2011	Przeglad Geologiczny	59	9		611	621		The occurrence of mineral waters and related spas constitutes the leading theme of the projected geopark: Flysch Carpathians and their mineral waters. The geopark is located on the Beskid Sqdecki and Beskid Niski area on the Polish side. It is situate in the area of the occurrence of three Carpathian units: Magura Nappe (the major part of the area), which includes Krynica, Bystrica, Racza and Sia…	Flysch; Geopark; Geotourism; Mineral waters; Outer Carpathians; Spa; Valorization	cross-border relations; cultural heritage; flysch; geodiversity; geomorphology; tourism; tourist attraction; tourist destination; Beskid Niski; Beskid Sadecki; Beskydy Mountains; Carpathians	Scopus
116	Monge-Ganuzas M.	Geoconservation in the Autonomous Region of the Basque Country (Spain)	Spain		geoconservation	-3.9879383	43.0135419	2021	Geoheritage	13	4	106			10.1007/s12371-021-00635-y	The Basque Country is an autonomous region located in the north-east of Spain and presents a high geodiversity index and international significant geoheritage. In this territory, there are two UNESCO designations: Urdaibai Biosphere Reserve and Basque Coast Global Geopark. Both bodies follow the path to sustainability taking into account nature management in a holistic way and complementing it wi…	Basque; Basque Coast UNESCO Global Geopark; Geoconservation; Strategy; Urdaibai Biosphere Reserve	environmental management; environmental policy; geodiversity; heritage conservation; spatiotemporal analysis; strategic approach; sustainability; UNESCO; Basque Country [Spain]; Bizkaia; Spain; Urdaibai Biosphere Reserve	Scopus
117	Muižniece E., Soms J.	A geomorphological approach for enhancing environmental management and conservation of landforms as protected nature objects in the upper daugava spillway valley	Latvia		geoconservation	26.7310039	55.8688225	2015	Vide. Tehnologija. Resursi - Environment, Technology, Resources	2			225	231	10.17770/etr2015vol2.252	This paper describes the application of geomorphological approach for environmental management and conservation of landforms. Specifically, we discuss the contribution of geomorphological field survey and adapted matrix methodology (in combination with understanding of geology) to identification, study and evaluation of those abiotic nature elements which represent geological and geomorphological…	Environmental management; Landforms; Protected nature objects	Geology; Geomorphology; Landforms; Spillways; Surveys; Field surveys; Geodiversity; Geological features; Management and conservations; Nature monuments; Protected landscape area; Protected nature objects; Recognition of objects; Environmental management	Scopus
118	Najwer A., Borysiak J., Gudowicz J., Mazurek M., Zwoliński Z.	Geodiversity and Biodiversity of the Postglacial Landscape (Dȩbnica River Catchment, Poland)	Poland		biodiversity and geodiversity	16.1223497	53.7265476	2016	Quaestiones Geographicae	35	1		5	28	10.1515/quageo-2016-0001	The preparation of a proper zoning plan or landscape-ecological plan requires taking into account recognition of the natural values of an area covered by the plan and evaluating its abiotic and biotic diversities. The aim of the paper is to present the new approach to the procedure of geodiversity and biodiversity assessment. This procedure is used to characterise abiotic and biotic heterogeneity…	biodiversity; diversity assessment; diversity mapping; geodiversity; Poland; Western Pomerania	algorithm; biodiversity; catchment; diversity index; environmental assessment; geodiversity; heterogeneity; human activity; landscape ecology; mapping method; Postglacial; vegetation mapping; Poland [Central Europe]; Pomerania	Scopus
119	Najwer A., Jankowski P., Niesterowicz J., Zwoliński Z.	Geodiversity assessment with global and local spatial multicriteria analysis	Poland		geodiversity evaluation	22.5870315	50.433032	2022	International Journal of Applied Earth Observation and Geoinformation	107		102665			10.1016/j.jag.2021.102665	The paper reports on geodiversity assessments of three national parks in Poland, performed independently by experts and volunteers. Each national park selected for the study represents one of three morphogenetically different landscape types: mountains, uplands, and plains. The expert and volunteer assessment data sets were separately processed with two spatial multicriteria methods: Weighted Lin…	Crowdsourcing; Geodiversity; Geodiversity assessment; Local weighted linear combination; Spatial multicriteria analysis; Weighted linear combination	crowdsourcing; geodiversity; mountain region; multicriteria analysis; national park; spatial analysis; upland region; Poland [Central Europe]	Scopus
120	Necheş I.-M., Erdeli G.	Geolandscapes and Geotourism: Integrating Nature and Culture in the Bucegi Mountains of Romania	Romania		cultural heritage and geodiversity	25.4510402	45.3875478	2015	Landscape Research	40	4		486	509	10.1080/01426397.2014.939616	Originally considered “exclusively geomorphological”, geolandscapes are multilayered landscapes defined by remarkable sights of natural diversity and different levels of human use. The paper approaches geolandscapes and geotourism from a geographical perspective and advances a unifying view of geodiversity, biodiversity and cultural values as major components of geolandscapes. Within this context…	Geolandscapes; Geotourism; Interpretation; Protected areas; Sustainability	biodiversity; cultural relations; geodiversity; landscape; management practice; nature conservation; protected area; sustainability; tourism; Bucegi Mountains; Carpathians; Romania	Scopus
121	Nemanja, T	l The Potential of Lazar Canyon (Serbia) as a Geotourism Destination: Inventory and Evaluation	Serbia		geotourism	21.0965786	43.4617599	2011	GEOGRAPHICA PANNONICA	15	3		103	112		The aim of this paper is to present the Lazar's Canyon area as a potential geotourism destination. The region of eastern Serbia, where this canyon is located, has the highest concentration of geosites in the country. This makes the Lazar's Canyon area a good candidate for becoming a Geopark in the future. Despite it's rich geodiversity, this region lacks the infrastructure and qualified staff req…	Lazar's Canyon; evaluation; geotourism; geoheritage; geopark; Serbia		Web of Science
122	Ng, K; Phillips, MR; Calado, H; Borges, P; Veloso-Gomes, F	Seeking harmony in coastal development for small islands: Exploring multifunctional artificial reefs for Sao Miguel Island, the Azores	Portugal		sustainability	-25.4032819	37.7766393	2013	APPLIED GEOGRAPHY	44			99	111	10.1016/j.apgeog.2013.07.013	The Azores is a remote archipelago rich in biodiversity, geodiversity and cultural heritage located in the middle of the North Atlantic Ocean. It comprises nine volcanic Small Islands (SIs) scattered over 600 km and are vulnerable to coastal hazards due to limited land availability and ocean exposure. To mitigate and adapt to hazards and human occupation, traditional hard-engineering structures h…	Surfing; Multipurpose reef; Coastal protection; Coastal hazards; Sustainable development; Amenity values	BEACH	Web of Science
123	Nita, J; Myga-Piatek, U	Geotourist potential of post-mining regions in Poland	Poland		geotourism	18.7469228	50.1864652	2014	BULLETIN OF GEOGRAPHY-PHYSICAL GEOGRAPHY SERIES	7	1		139	156	10.2478/bgeo-2014-0007	The current article will attempt to confirm that Polish post-mining areas are characterized by high cognitive and aesthetic values and that they have great geotourism potential, which has been little used so far. Tourism is regarded to be one of the most dynamically growing sectors of the global economy and is a phenomenon that occurs in the landscapes of all ecological and altitudinal zones. Geo…	geotourism; geodiversity; post-mining areas; geotourism regions	ECOSYSTEM DEVELOPMENT; MINE; REHABILITATION; LANDSCAPES	Web of Science
124	Pal, M; Albert, G	GEODIVERSITY ASSESSMENT OF THE EASTERN STYRIAN PREALPS AND ITS SURROUNDINGS (AUSTRIA-HUNGARY)	Austria, Hungary		geodiversity evaluation	15.5153483	47.3788316	2022	8TH INTERNATIONAL CONFERENCE ON CARTOGRAPHY AND GIS, VOL. 2				74	82		Geodiversity is the variety of earth scientific elements that can be distinguished from each other based on their unique characteristics. Examining the occurrence frequency of geological, relief, pedological and hydrological factors of an area relieves its geoscientific complexity and relates to the geotourism and geoheritage potential. Geosites, the most spectacular and interesting inanimate nat…	geodiversity; GIS; Austria; Hungary; geosciences		Web of Science
125	Pal, M; Albert, G	Geodiversity mapping of the Bakony-Balaton UNESCO Global Geopark, Hungary	Hungary		geodiversity evaluation	17.6412028	46.9230764	2021	30TH INTERNATIONAL CARTOGRAPHIC CONFERENCE (ICC 2021), VOL 4						10.5194/ica-proc-4-82-2021	Geodiversity is the natural range of elements in the physical environment. The relationships, properties, and systems of geoscientific features have an impact not only on the natural world but also on cultural and societal aspects of life. Geodiversity can be considered as a quantitative variable that is unevenly distributed all over the world. This spatial variability helps to locate areas with …	geodiversity; GIS analysis; visualization; geosciences		Web of Science
126	Pal, M; Albert, G	Refinement Proposals for Geodiversity Assessment-A Case Study in the Bakony-Balaton UNESCO Global Geopark, Hungary	Hungary		geodiversity evaluation	17.5203532	46.9155724	2021	ISPRS INTERNATIONAL JOURNAL OF GEO-INFORMATION	10	8	566			10.3390/ijgi10080566	Geodiversity is the variety of natural elements that are excluded from biodiversity, such as: geological, geomorphological, and soil features including their properties, systems, and relationships. Geodiversity assessment measures these features, emphasising the characteristics and physical fragility of the examined areas. In this study, a quantitative methodology has been applied in Bakony-Balat…	GIS analysis; abiotic nature; geomorphons; normalisation; geodiversity		Web of Science
127	Panizza M.	The dolomites and their geomorphodiversity	Italy		geomorphological mapping	11.9729737	46.3771747	2011	Geographia Polonica	84	SUPPL. 2		107	115	10.7163/GPol.2011.S2.8	Following the concept of geomorphodiversity which was introduced by the author (Panizza, 2009a), the peculiarities of the geomorphology of the Dolomites are summarized. First of all, they have specific geomorphological and landscape characteristics, which distinguish them from all other mountains in the world; i.e., they have greatly accentuated extrinsic geomorphodiversity on a global scale. In …	Geoheritage; Geomorphodiversity; Geomorphology; The dolomites; UNESCO	dolomite; geodiversity; geomorphology; landform; morphostructure; UNESCO	Scopus
128	Panizza M.	The geomorphodiversity of the Dolomites (Italy): A Key of geoheritage assessment	Italy		geoheritage	11.7532471	46.3202985	2009	Geoheritage	1	1		33	42	10.1007/s12371-009-0003-z	The term geodiversity is presented and critically examined. A summary of the concepts and definitions of this term is given, underlining the various approaches; in general, geodiversity is defined as a set of different "geological" elements over a certain area. A new approach is proposed, based on the identification of the "geological" elements, which mostly characterise the landscape features of…	Dolomites; Geodiversity; Geoheritage; Geomorphodiversity; Geomorphology	altitude; dolomite; geological theory; geomorphology; global perspective; karst; morphogenesis; regional geology; spatial distribution; Italy	Scopus
129	Pardo-Igúzquiza E., Durán-Valsero J.J., Dowd P.A., Luque-Espinar J.A., Heredia J., Robledo-Ardila P.A.	Geodiversity of closed depressions in a high relief karst: Geoeducation asset and geotourism resource in the “Sierra de las Nieves” National Park (Málaga Province, Southern Spain)	Spain		education	-4.9430728	36.6927242	2022	International Journal of Geoheritage and Parks	10	2		196	217	10.1016/j.ijgeop.2022.04.001	Closed depressions are scale-invariant landforms that are the most distinctive and characteristic landform in karst terrains at the millimetre-to-kilometre scales. The purpose of this paper is twofold. The first is to raise awareness of the geoheritage and geoeducational asset provided by closed depressions in a high-relief karst massif with the objective of promoting geotourism in the Sierra de …	closed depressions; doline types; geodiversity; geoheritage; geotourism; sinkholes	doline; education; geodiversity; geotourism; karst; national park; relief; sinkhole; Andalucia; Betic Cordillera; Malaga [Andalucia]; Sierra de las Nieves; Spain	Scopus
130	Pellitero R.	Geomorphology and geomorphological landscapes of Fuentes Carrionas	Spain		geomorphological mapping	-4.7301349	43.0105881	2014	Journal of Maps	10	2		313	323	10.1080/17445647.2013.867822	A 1:12,000 geomorphological map of Fuentes Carrionas (Northern Spain) is presented. Geomorphological landscapes maps are also shown to support map interpretation and show the area's geomorphological diversity. The maps were developed using the IGUL (Institut de Géographie, Université de Lausanne) geomorphological mapping legend. This has been adapted to GIS scheme in order to use the map as a bas…	Cantabrian Range; Fuentes Carrionas; geodiversity; geomorphological landscapes; geomorphological map; GIS		Scopus
131	Pellitero R., González-Amuchastegui M.J., Ruiz-Flaño P., Serrano E.	Geodiversity and geomorphosite assessment applied to a natural protected area: The ebro and rudron gorges natural park (spain)	Spain		geomorphological mapping	-3.4593469	42.7429593	2010	Geoheritage	3	3		163	174	10.1007/s12371-010-0022-9	Geodiversity and geomorphosites in a natural protected area in Spain are evaluated. The estimation of geodiversity has been calculated by habitat and by geomorphological unit based on the calculation method developed by Serrano and Ruiz-Flaño, and geomorphosites have been assessed for the same area. Finally, results from the calculation of geodiversity and geomorphosites are compared. The aim is …	Geodiversity; Geoheritage; Geomorphological units; Geomorphosites; Habitats; Natural protected areas		Scopus
132	Pellitero R., Manosso F.C., Serrano E.	Mid- and Large-Scale Geodiversity Calculation in Fuentes Carrionas (NW Spain) and Serra do Cadeado (Paraná, Brazil): Methodology and Application for Land Management	Spain		geodiversity evaluation	-4.7326669	43.0103684	2015	Geografiska Annaler, Series A: Physical Geography	97	2		219	235	10.1111/geoa.12057	A state-of-the-art geodiversity concept, its use and scientific development are presented. Methodologies for geodiversity calculation are assessed, as well as their aim and problems. Geodiversity calculation methodology based on biodiversity richness index is explained and applied to two different areas: Fuentes Carrionas, a high mountain mid-latitude environment in northern Spain, and Serra do C…	Environmental impact; Environmental management; Geodiversity; Geotourism; Natural diversity		Scopus
133	Pereira, AC; Martins, BMSC	Interactions between geomorphological heritage and cultural landscape of Serra do Alvao: the perspective of cultural geomorphology	Portugal		cultural heritage and geodiversity	-7.6950109	41.5200362	2016	VEGUETA-ANUARIO DE LA FACULTAD DE GEOGRAFIA E HISTORIA		16		437	459		Cultural Geomorphology seeks to reveal the multiplicity of dimensions, meanings and values intrinsic to geomorphological heritage while supporting the cultural landscape in its interaction with the historical and archaeological, architectural or immaterial heritage. In this perspective, the concept of geomorphosite includes landforms that stand out for their importance to the shaping of the lands…	Cultural Geomorphology; Cultural Landscape; Geomorphological Heritage	GEODIVERSITY	Web of Science
134	Pereira, DI; Pereira, P; Brilha, J; Cunha, PP	The Iberian Massif Landscape and Fluvial Network in Portugal: a geoheritage inventory based on the scientific value	Portugal		geoheritage	-7.5470988	41.2340251	2015	PROCEEDINGS OF THE GEOLOGISTS ASSOCIATION	126	2		252	265	10.1016/j.pgeola.2015.01.003	Integrated in the national inventory of geological heritage in Portugal, the Iberian Massif Landscape and Fluvial Network was selected as one of the geological frameworks with international relevance. Taking into account the diversity of geomorphological and stratigraphic elements occurring in the Portuguese Iberian Massif, 38 geosites were selected in order to represent five themes related to th…	Geoheritage; Geoconsenration; Inventory; Landscape; Iberian Massif	TEJO RIVER; TECTONICS; EVOLUTION; TERRACES; INCISION; GEOCONSERVATION; GEODIVERSITY; FRAMEWORKS; RODAO; AREA	Web of Science
135	Pérez-Gómez R., Ibáñez J.-J.	Cartography and geovisualisation techniques in the exploratory study of geodiversity: Almeria case study	Spain		geodiversity evaluation	-2.5453506	36.89443	2014	Lecture Notes in Geoinformation and Cartography	0			119	129	10.1007/978-3-319-08180-9_10	The purpose of this chapter is to describe some research into geodiversity, and conducted in the Almeria Province from a cartographic and GIS perspective. This is an area of special interest because of its aridity and severe desertification processes. Geodiversity is becoming a research topic of increasing interest among earth scientists as it may play a key role when evaluating the ecological, e…		Catchments; Maps; Almeria; Case-studies; Ecological values; Environmental values; Exploratory studies; Geodiversity; Geovisualization; Research topics; Social values; Summary statistic; Geographic information systems	Scopus
136	Pérez-Gómez R., Ibáñez J.-J., Hoehne A.V.	A cartographic and GIS perspective of geodiversity analysis: The Iberian Peninsula/Spain case study	Spain		geodiversity evaluation	-4.495867	40.8190206	2014	Lecture Notes in Computer Science (including subseries Lecture Notes in Artificial Intelligence and Lecture Notes in Bioinformatics)	8582 LNCS	PART 4		14	30	10.1007/978-3-319-09147-1_2	This paper describes some research that has been conducted on a topic of growing interest among earth scientists like geodiversity from a cartographic and GIS perspective. Many soil and earth scientists consider that geodiversity measurement and quantification should play a key role when evaluating the ecological, environmental and social value of a territory. This geodiversity project is based o…	3D models; Cartography; geodiversity; GIS; Iberian Peninsula; lithodiversity; soil diversity; spatial analysis	Artificial intelligence; Computer science; Computers; Geographic information systems; Mapping; 3D models; Geodiversity; Iberian Peninsula; lithodiversity; Spatial analysis; Maps	Scopus
137	Perotti L., Bollati I.M., Viani C., Zanoletti E., Caironi V., Pelfini M., Giardino M.	Fieldtrips and virtual tours as geotourism resources: Examples from the Sesia Val Grande UNESCO Global Geopark (NW Italy)	Italy		education	8.2582419	45.860956	2020	Resources	9	6	63			10.3390/RESOURCES9060063	In the 20th anniversary year of the European Geopark Network, and 5 years on from the receipt of the UNESCO label for the geoparks, this research focuses on geotourism contents and solutions within one of the most recently designated geoparks, admitted for membership in 2013: the Sesia Val Grande UNESCO Global Geopark (Western Italian Alps). The main aim of this paper is to corroborate the use of…	Fieldtrips; Geodiversity; Geoheritage; Italian NW Alps; Multidisciplinary approach; Sesia Val Grande UNESCO Global Geopark; Virtual tours		Scopus
138	Perotti L., Carraro G., Giardino M., De Luca D.A., Lasagna M.	Geodiversity evaluation and water resources in the Sesia Val Grande UNESCO Geopark (Italy)	Italy		hydrodiversity	8.1799643	45.7681114	2019	Water (Switzerland)	11	10	2102			10.3390/w11102102	This paper aims at systemizing knowledge related to geodiversity assessment for water resources and its evaluation. The novel aspect connected to geodiversity of this paper is the analysis of the components of hydrological system, both at the superficial and underground level, in the territory of the Sesia Val Grande United Nations educational, scientific, and cultural organization (UNESCO) Globa…	Geodiversity assessment; Geoheritage; Geosystem services; Hydrogeodiversity; Sesia Val Grande UNESCO Global Geopark; Water resources	Geology; Geodiversity; Geoheritage; Geosystems; Hydrogeodiversity; Sesia Val Grande UNESCO Global Geopark; Water resources; assessment method; ecosystem approach; geodiversity; GIS; hydrodynamics; hydrogeology; strategic approach; UNESCO; water resource	Scopus
139	Petrişor A.-I.	GIS assessment of landform diversity covered by natural protected areas in Romania	Romania		geomorphological mapping	26.3648	46.2580417	2009	Studia Universitatis Vasile Goldis Arad, Seria Stiintele Vietii	19	2		359	363		The richness of the natural heritage of Romania pleads for the need of conserving its geodiversity and biodiversity. The natural protected areas (reserves) should reflect the national biogeographical diversity. Geographical Information Systems provide a methodology to assess whether this conservation goal is met. This paper focuses on employing the GIS methodology to assess whether existing natur…	Biodiversity; Geodiversity; GIS; Landforms; Natural protected areas		Scopus
140	Planagumà-Guàrdia L., Martí-Molist J., Vila-Subirós J.	Conservation of the Geological Heritage of Volcanic Fields: La Garrotxa Volcanic Zone Natural Park, Spain	Spain		geoconservation	2.5451066	42.151206	2022	Geoheritage	14	2	39			10.1007/s12371-022-00677-w	This article evaluates the strategy approved in 2000 for managing the geological heritage of La Garrotxa Volcanic Zone Natural Park (PNZVG). The conservation of geodiversity and geological heritage provides a foundation for the conservation of other types of heritage, for example, in the fields of forestry, agriculture, industry, and urban development. The human imprint on this natural Park is si…	Awareness-raising; Geodiversity; Geological heritage; Protected natural area; Volcanic field	geodiversity; heritage conservation; management practice; morphology; protected area; volcano; Spain	Scopus
141	Poch J., Teixell A., Gómez-Gras D., Martínez F.J., Cardellach E., Briansó J.L.	Methodological proposal for the valorization of the geodiversity of rural areas comparable with the zat valley	Spain		geodiversity evaluation	1.9713663	41.5139591	2019	UNESCO Global Geoparks: Tension Between Territorial Development and Heritage Enhancement				109	132	10.1002/9781119681489.ch6	This chapter shows, in a synthetic way, the main contributions to the GEOPARK Project of a team of the Department of Geology of the <i>Universitat Autònoma de Barcelona</i>. It focuses on the values of the geodiversity of the Zat Valley and the surroundings. A methodological proposal is presented for the realization of an inventory and the valuation of the geodiversity, which may be suitable for …	Geodiversity; Geoethics framework; GEOPARK project; Methodological proposal; Rural areas; SWOT analysis; Zat Valley		Scopus
142	Ponjiger, TM; Lukic, T; Vasiljevic, DA; Hose, TA; Basarin, B; Markovic, SB; Milanovic, MM; Valjarevic, A; Vujicic, MD; Stankov, U; Blagojevic, D; Nekic, N; Blesic, I	Quantitative Geodiversity Assessment of the Fruška Gora Mt. (North Serbia) by Using the Geodiversity Index	Serbia		geodiversity evaluation	19.6604475	45.1809293	2021	Geoheritage	13	3	61			10.1007/s12371-021-00572-w	The Fruška Gora Mt., as a dominant orographic complex in the Pannonian plain, was selected for a pioneer geodiversity quantification study area due to its unique geology and soil properties. The methodology is based on the geodiversity quantification assessment approach of Serrano and Ruiz-Flaño (Geogr Helv 62:140–147, 2007). It employed a 500 × 500 m grid approach on several maps (lithological, …	Fruška Gora Mt; Geodiversity index; Grid approach; Mapping	assessment method; conservation management; decision making; digital elevation model; geodiversity; heritage conservation; index method; national park; Danube River; Fruska Gora; Serbia	Scopus
143	Queiroz R.E., Guerreiro J., Ventura M.A.	Demand of the tourists visiting protected areas in small oceanic islands: the Azores case-study (Portugal)	Portugal		geotourism	-28.3170985	38.4522621	2014	Environment, Development and Sustainability	16	5		1119	1135	10.1007/s10668-014-9516-y	In general, tourism plays a significant role in the economy of archipelagos and islands. The Autonomous Region of the Azores has a great potential for tourism, offering multiple attractions, both natural and cultural, creating a big challenge for a sustainable tourism policy since little attention has been paid to the archipelagos and their special needs. This work aims to understand the profile …	Azores archipelago; Ecotourism; Small islands; Tourism demand; Tourists’ profile	Cetacea	Scopus
144	Radovanovic, M; Mijovic, D	Climatic Peculiarities as the Earth Heritage Elements of Serbia	Serbia		geoheritage	20.6428191	44.1197456	2005	GEOGRAPHICA PANNONICA	9			9	12		Theoretically, each point on the Earth, relative to the regional atmospheric circulation and geodiversity, has a particular type of climate; therefore, any conclusion on regional climate calls for some generalization. For a basic notion of the climatic peculiarities of Serbia, it would be sufficient to begin with its extreme and apply some statistics. The results and the analysis of morphological…	climate; peculiarities; Earth heritage; Serbia		Web of Science
145	Radovic, D; Ljesevic, M; Kukrika, M; Ninkov, T; Dzukic, G; Radovic, I	GIS and the Lake Skadar Region	Albania, Montenegro		geoheritage	19.4897257	42.1981801	2007	JOURNAL OF THE GEOGRAPHICAL INSTITUTE JOVAN CVIJIC SASA	57			483	493		The Skadar Lake Region represents one of the most important centers of geodiversity and biodiversity for Western Balkan and SE Europe. The largest part of this Region has the status of the National Park since 1983. International recognition of the importance of Skadar Lake ecosystems come in 1995, when the Lake was designated as Ramsar site. The geographical information system (GIS) that we have …	GIS; Skadar Lake Region; valorization; protection		Web of Science
146	Radwanek-Bak, B; Wasiluk, R; Bak, B; Kopciowski, R	NEW POLISH GEOPARK PROPOSAL- WISLOK RIVERVALLEY - THE POLISH TEXAS	Poland		geoparks	22.015611	49.8689945	2015	ECOLOGY, ECONOMICS, EDUCATION AND LEGISLATION, VOL I				595	602		Protection of geodiversity has been singled out from the protection of nature and landscape values in order to emphasize its specific role directly related to non-renewable abiotic environment. One of the most successful ideas in this area was a concept of geoparks. Their main goals are: to contribute to education and growth of geologic-environmental knowledge and also to support geotourism and s…			Web of Science
147	Radwanek-Bąk B., Laskowicz I.	Assessment of geodiversity as a method of geotourism potential assessment [Ocena georóżnorodności jako metoda określania potencjału geoturystycznego obszaru]	Poland		geotourism	20.3246562	49.4350434	2012	Annales Universitatis Mariae Curie-Sklodowska. Sectio B	67	2		77	95	10.2478/v10066-012-0021-8	[No abstract available]	assessment; geodiversity; georóżnorodność; geotourism; geoturystyka; ocena; Szczawnica; Szczawnica		Scopus
148	Raška P., Pokorný R., Krmíček L., Kuboušková S., Mortensen L.	Basaltic Dyke with Specific Volcanogenic Structures and Its Geomorphic Evolution: Unique Geoheritage of the Faroe Islands (North Atlantic Ocean)	Denmark		geoheritage	-6.9873048	62.1458926	2019	Geoheritage	11	2		417	426	10.1007/s12371-018-0296-x	Volcanic landforms resulting from Cenozoic volcanism represent the most peculiar features of global geodiversity and provide eminent narratives for geoeducation. Among them, however, relict volcanic forms and site-specific landforms in remote areas have received less attention. In this paper, we provide the first description of unique volcanogenic features (hereinafter referred to as pseudo-hiero…	Columnar jointing; Faroe Islands; Geoheritage; Palaeogene volcanism; Pseudo-hieroglyphs; Sandfelli dyke		Scopus
149	Rocha J., Brilha J., Henriques M.H.	Assessment of the geological heritage of Cape Mondego Natural Monument (Central Portugal)	Portugal		geoheritage	-8.8801837	40.19949	2014	Proceedings of the Geologists' Association	125	1		107	113	10.1016/j.pgeola.2013.04.005	In the western coast of Portugal, Cape Mondego is a well-known set of outcrops due to its international stratigraphic relevance given by the establishment of two stratotypes: the Global Boundary Stratotype Section and Point (GSSP) for the base of the Bajocian Stage and the Auxiliary Stratotype Section and Point (ASSP) for the base of the Bathonian Stage.The remarkable geodiversity of these Jurass…	Cape Mondego; Geosite management; Geosites assessment; Natural Monument	Bathonian; dinosaur; education; heritage conservation; microfossil; monument; outcrop; paleontology; stratigraphy; stratotype; Cape Mondego; Coimbra [Portugal]; Portugal; Dinosauria	Scopus
150	Roig-Munar, FX; Garcia-Lozano, C	Valuation of the inventory of the places of geological interest of Menorca, Balearic Islands	Spain		geosites	4.0977103	39.973802	2021	REVISTA DE LA SOCIEDAD GEOLOGICA DE ESPANA	34	2		3	16		A proposal of 36 Places of Geological Interest (LIG) on the island of Menorca are analyzed. This is a local inventory whose main objective is the representativeness of the geology and geomorphology of the island. The selection is mainly based on the intrinsic value of the places, as well as the potential for scientific, informative and tourist use. Their vulnerability has also been evaluated, as …	geodiversity; inventory; place of geological interest (LIG); Menorca		Web of Science
151	Rolfo F., Benna P., Cadoppi P., Castelli D., Favero-Longo S.E., Giardino M., Balestro G., Belluso E., Borghi A., Cámara F., Compagnoni R., Ferrando S., Festa A., Forno M.G., Giacometti F., Gianotti F., Groppo C., Lombardo B., Mosca P., Perrone G., Piervittori R., Rebay G., Rossetti P.	The Monviso Massif and the Cottian Alps as symbols of the alpine chain and geological heritage in Piemonte, Italy	Italy		geoheritage	7.0904685	44.6297397	2015	Geoheritage	7	1		65	84	10.1007/s12371-014-0097-9	In order to promote geosite conservation in the project entitled ‘PROactive management of GEOlogical heritage in the PIEMONTE Region’, we propose a comprehensive study involving the Monviso Massif (MM) geothematic area, one of the most outstanding symbols of the Alps and particularly of the Cottian Alps. Specifically, at the MM, the inventory of a number of different geosites whose conservation a…	Cottian Alps; Geological heritage; Geotourism; Monviso Massif; Piemonte		Scopus
152	Ruban, DA	CONCEPTUAL ANALYSIS OF DIVERSITY OF THE GEOLOGICAL HERITAGE OBJECTS BELONGING TO THE MAGMATIC TYPE	Russia		geoheritage	39.0163293	44.7267806	2013	TOMSK STATE UNIVERSITY JOURNAL		372		193	+		Geoconservation, which is aimed at sustainable use of the geological heritage at global, national, regional, and local levels, is one of the main direction of nature conservation practice both in the whole world and in Russia. In its most general treatment, geodiversity can be understood as a quantity of types of geological heritage objects. It should be specially noted, however, that many sub-ty…	geoconservation; Dakh Crystalline Massif; historical-cultural heritage; lithodems; magmatic rocks; magmatic bodies; geological heritage objects		Web of Science
153	Ruban, DA; Mikhailenko, AV; Yashalova, NN	Valuable geoheritage resources: Potential versus exploitation	Russia		sustainability	40.1826476	44.7800409	2022	RESOURCES POLICY	77		102665			10.1016/j.resourpol.2022.102665	Geoheritage is an important geological resource, which can provide with various socio-economical benefits. Although much attention has been paid to its potential use, the actual patterns of this resource exploitation are yet to be fully understood. Mountainous Adygeya, a geologically-rich area of the Western Caucasus, is used for testing semi-quantitative, scoring-based approaches for documenting…	Anthropogenic pressure; Geological resources; Geosite; Resources policy; Mountainous Adygeya	GEOLOGICAL HERITAGE; GEODIVERSITY; GEOCONSERVATION; GEOTOURISM; CONSERVATION; LEGISLATION; MANAGEMENT; EDUCATION; VALUES	Web of Science
154	Ruban, DA; Zorina, SO; Rebezov, MB	Dispersed Geoheritage Points of the Lagonaki Highland, SW Russia: Contribution to Local Geoheritage Resource	Russia		geoheritage	40.0240896	44.0722526	2019	GEOSCIENCES	9	9	367			10.3390/geosciences9090367	Dispersed geoheritage points, which are small-sized and low-unique localities, manifest local geoheritage and, thus, may be useful for its comprehensive understanding. Field studies in the Lagonaki Highland (Western Caucasus, southwestern Russia) have permitted to find four geoheritage points that are described with argumentation of their importance to scientists, educators, and/or tourists. Thes…	calcite vein; fossil invertebrate; geoconservation; geosite; landscape management; limestone; tourism; late jurassic; western caucasus	WESTERN CAUCASUS; QUANTITATIVE ASSESSMENT; MANAGEMENT; GEODIVERSITY; GEOSITES; HERITAGE	Web of Science
155	Rypl J., Kirchner K., Ryplová R.	Contribution to the Assessment of Geomorphosites in the Czech Republic (a Case Study of the North-eastern Part of the Novohradské Mountains)	Czechia		geomorphological mapping	14.5787761	48.6997835	2019	Geoheritage	11	2		427	439	10.1007/s12371-018-0293-0	It is widely accepted these days that to a nature conservation protection of an abiotic nature, less attention is payed than to the protection of a biotic nature. But components and processes of an abiotic nature are together with human activities deciding factors influencing significantly the landscape in general. Hence, it is necessary to inventory, identify, and evaluate specific geological an…	Abiotic nature; Assessment; Geodiversity; Geoheritage values; Geomorphosites		Scopus
156	Rypl, J; Kirchner, K; Kubalikova, L; Divisek, J	Geological and Geomorphological Conditions Supporting the Diversity of Rock Landforms in the Pohorska Mountains (South Bohemia, Czech Republic)	Czechia		geomorphological mapping	14.6173456	48.6873797	2020	GEOHERITAGE	12	1	2			10.1007/s12371-020-00430-1	The Pohorska Mountains, a geomorphological subunit of the Novohradske Mountains in the southern part of the Bohemian Massif, represent a unique natural area situated on the border between the Czech Republic and Austria. The area was virtually inaccessible during the Cold War because of its localization close to the Iron Curtain. After 1989, the extensive geomorphological mapping with an emphasis …	Diversity of landforms; Geomorphological mapping; Lithology; Rock landforms; Spatial analysis	HORY MTS.; ECOSYSTEM SERVICES; GEODIVERSITY; GEOCONSERVATION; GIS; BIODIVERSITY; INVENTORY; MAP	Web of Science
157	Samec P., Volánek J., Kučera M., Cudlín P.	Effect of soil diversity on forest plant species abundance: a case study from central-European highlands	Czechia	no	biodiversity and geodiversity	14.4419077	49.8978857	2021	Forests	12	5	534			10.3390/f12050534	Plant distribution is most closely associated with the abiotic environment. The abiotic environment affects plant species’ abundancy unevenly. The asymmetry is further deviated by human interventions. Contrarily, soil properties preserve environmental influences from the anthropogenic perturbations. The study examined the supra-regional similarities of soil effects on plant species’ abundance in …	Forest plant diversity; Geodiversity; Soil chemical properties; Soil groups	Ecosystems; Geographical regions; Soils; Biogeographical regions; Environmental influences; Geographically weighted regression; National forest inventories; Regional similarities; Soil chemical property; Spatial dependencies; Spatial relationships; Forestry; asymmetry; forest dynamics; forest management; geodiversity; geographical region; regression analysis; soil property; temperate forest; Asym…	Scopus
158	Sanz J., Zamalloa T., Maguregi G., Fernandez L., Echevarria I.	Educational Potential Assessment of Geodiversity Sites: a Proposal and a Case Study in the Basque Country (Spain)	Spain		education	8.5560591	44.7497783	2020	Geoheritage	12	1	23			10.1007/s12371-020-00432-z	Informal education facilities help schools to engage in meaningful outdoor geology experiences, providing educational materials and a learning environment that meet rigorous scientific and educational standards. In some cases, these sites focus on the general public and do not share the same educative paradigm of schools. Likewise, due to the particular nature of Earth sciences, many geological p…	Assessment methodology; Educational resources; Geology; Informal education	assessment method; education; geodiversity; geology; methodology; Basque Country [Spain]; Spain	Scopus
159	Scarsi M., Crispini L., Malatesta C., Spagnolo C., Capponi G.	Geological map of a treasure chest of geodiversity: The Lavagnina lakes area (Alessandria, Italy)	Italy		education	-2.2494833	50.6285609	2019	Geosciences (Switzerland)	9	5	229			10.3390/geosciences9050229	The aim of this work is to present a new georeferenced geological map of an area in the Ligurian Western Alps (Lavagnina Lakes area) that includes both a unique geodiversity and great biodiversity, a peculiar geological heritage, and cultural features. The study area is located in the northern part of the Capanne di Marcarolo Regional Natural Park, occurring in the southern Piedmont Region (Aless…	Dissemination and outreach; Natural park; QGIS geological mapping		Scopus
160	Scriven S.	The Jurassic Coast Story Book: An approach to geoheritage interpretation from the Jurassic Coast World Heritage Site	Great Britain		education	-4.3094199	43.0559669	2019	Proceedings of the Geologists' Association	130	2023-04-03		493	506	10.1016/j.pgeola.2018.09.005	The World Heritage status of the Jurassic Coast has important implications for how the geoheritage of the site is communicated to audiences. UNESCO defines World Heritage Sites as places with Outstanding Universal Value to all people that must be preserved for future generations. Building relationships between people and place is key to conservation and on the Jurassic Coast that is delivered by …	Geoconservation; Geodiversity; Geoheritage; Geology; Heritage interpretation; Jurassic Coast World Heritage Site	environmental protection; geodiversity; Jurassic; nature conservation; UNESCO; World Heritage Site	Scopus
161	Sinnyovsky D., Kalutskova N., Dronin N., Sinnyovska D., Medvedev A., Telnova N.	Concepts of geoparks establishment in Bulgaria and their geothermal resources	Bulgaria		geoparks	25.0881888	42.3083068	2019	IOP Conference Series: Earth and Environmental Science	367	1	12006			10.1088/1755-1315/367/1/012006	Bulgaria is the third country in the world by number of mineral springs after Japan and Iceland. The Bulgarian-Russian collaboration in geological, environmental and landscape conservation provided a new development of the methodology for identification, evaluation and characterization of geodiversity including their geotermal resources. Individual approach to the concepts of the national geopark…		Geothermal fields; Geothermal springs; Sea level; Soils; Common features; Environmental conditions; Geothermal activity; Geothermal resources; Glacial landscapes; Landscape conservation; Lower triassic; Sealevel change; Mineral springs	Scopus
162	Sinnyovsky, D	Precambrian metamorphites as part of the petrographic diversity of Rila Geopark	Bulgaria		geodiversity evaluation	23.1545951	42.0967088	2021	SPISANIE NA B LGARSKOTO GEOLOGICHESKO DRUZHESTOV-REVIEW OF THE BULGARIAN GEOLOGICAL SOCIETY	82			11	29	10.52215/rev.bgs.2021.82.1.3	The petrographic diversity of Rila Mountain is an important prerequisite for the development of Rila Geopark and its nomination for UNESCO Geopark. According to the principle of the thematic geodiversity, the leading theme of the geopark - glacial landscapes, is complemented by the remarkable petrographic diversity of igneous and metamorphic rocks, in which alpine glacial forms are developed. Fol…	Rila Geopark; petrographic diversity; lithodemic units	UNITS	Web of Science
163	Sinnyovsky, D	Rila-West Rhodopes Batholith and petrographical diversity of Rila Geopark	Bulgaria		geodiversity evaluation	23.3962943	42.0559356	2020	SPISANIE NA B LGARSKOTO GEOLOGICHESKO DRUZHESTOV-REVIEW OF THE BULGARIAN GEOLOGICAL SOCIETY	81			41	63	10.52215/rev.bgs.2020.81.2.4	The full retrospective of the petrographic study of the Rila granitoids, which are an essential part of the geodiversity of Rila Geopark, is crucial for the impartial assessment of its geoconservation value and for developing appropriate promotional materials in a language accessible to the general public. The Rila-West Rhodopes batholith, the largest batholith in the Balkans, contributes to the …	Rila Geopark; Rila-West Rhodopes Batholith; petrographic diversity; geotrails		Web of Science
164	Sisto M., Di Lisio A., Russo F.	Geosite Assessment as a Tool for the Promotion and Conservation of Irpinia Landscape Geoheritage (Southern Italy)	Italy		geosites	15.382887	41.0667969	2022	Resources	11	10	97			10.3390/resources11100097	Irpinia (Province of Avellino, Campania Region) is a historical–geographical region of Southern Italy inhabited in pre-Roman times by the ancient Samnite tribe of the Irpini, from which the name originates. This area is characterized by both low population density and high naturalness; located on the axial sector of the southern Apennine orogenic chain, the area possesses a complex hilly and moun…	cultural landscape; geoheritage; geosites; Irpinia; quantitative assessment; Southern Italy		Scopus
165	Sisto M., Di Lisio A., Russo F.	The Mefite in the Ansanto Valley (Southern Italy): a Geoarchaeosite to Promote the Geotourism and Geoconservation of the Irpinian Cultural Landscape	Italy		geoconservation	15.1176813	40.9590559	2020	Geoheritage	12	1	29			10.1007/s12371-020-00450-x	The Mefite site in Ansanto Valley is located in the Rocca San Felice municipality (Province of Avellino, Campania Region, Italy), namely in Irpinia: this region was in ancient times inhabited by Hirpini (the where part of the local tribal system). The site is in the same time inserted in a wide rural landscape preservin0067 still today a high grade of naturality. As regards the geological structu…	Ansanto Valley; Geoconservation; Geotourism; Irpinia; Mefite; Southern Italy	conservation planning; endemic species; geotourism; heritage tourism; historical record; Middle Ages; nineteenth century; rural landscape; survival; Avellino; Campania [Italy]; Campania [Italy]; Irpinia; Italy; Mephitis	Scopus
166	Skibiński J., Kultys K., Baran-Zgłobicka B., Zgłobicki W.	Geoparks in SE Poland as areas of tourism development: Current state and future prospects	Poland		geoparks	21.7915051	50.5842267	2021	Resources	10	11	113			10.3390/resources10110113	Geoparks currently form the basis for the development of geotourism and, therefore, proposals of new geoparks are developed in many countries, including Poland, where over 20 locations for geoparks have been proposed so far. Two national geoparks have been established thus far, while another two have received the status of UNESCO Global Geoparks None of them are located in the Carpathian Mountain…	Cultural heritage; Geodiversity; Geoheritage; Geotourism; Tourism assessment		Scopus
167	Somma R.	The Inventory and Quantitative Assessment of Geodiversity as Strategic Tools for Promoting Sustainable Geoconservation and Geo-Education in the Peloritani Mountains (Italy)	Italy		geoconservation	15.3332475	38.0489862	2022	Education Sciences	12	9	580			10.3390/educsci12090580	Most methods used for geoheritage inventories do not consider the quantitative assessment of the geodiversity indicators; consequently, it can happen that some geosites are wrongly inventoried as geodiversity sites and vice versa or activities for scientific, educational, and touristic purposes actually should not be planned in geoheritage sites unprovided with requirements. The main aim of the p…	degradation risk; educational use; geoconservation; geodiversity; geoheritage; geology; inventory; quantitative assessment; scientific value; touristic use		Scopus
168	Soms J.	Assessment of geodiversity as tool for environmental management of protected nature areas in South-Eastern Latvia	Latvia		geoconservation	27.266939	56.2029082	2017	Vide. Tehnologija. Resursi - Environment, Technology, Resources	1			271	277	10.17770/etr2017vol1.2581	The environmental management and nature protection policy in Latvia is mainly focused on biodiversity and protected species, while a geodiversity is ‘forgotten side’ of nature conservation work. Such situation is associated with an absence of a unified methodology for assessment of geodiversity, which is a shortened version of the term ‘geological and geomorphological diversity’. The concept of g…	Environmental management; Geodiversity; Geodiversity index; GIS; Protected nature areas	Biodiversity; Conservation; Geographic information systems; Geology; Numerical methods; Geodiversity; Morphogenetic process; Protected nature areas; Quantitative assessments; Scientific literature; Spatial variability; Terrain roughness; Unified methodology; Environmental management	Scopus
169	Stancheva M., Stanchev H., Peev P., Anfuso G., Willliams A.T.	Coastal protected areas and historical sites in North Bulgaria – Challenges, mismanagement and future perspectives	Bulgaria		cultural heritage and geodiversity	28.0579547	43.4899931	2016	Ocean and Coastal Management	130			340	354	10.1016/j.ocecoaman.2016.07.006	Coastal protected areas and historical heritage sites in Bulgaria are established by national policy instruments/laws and EU Directives to protect a wide range of natural and cultural resources. This paper demonstrated the development of a detailed inventory based on GIS tools which is able to document a variety of protected areas and heritage sites along the North Bulgarian Black Sea coast with …	Coastal protected areas; Coastal zone management; Geodiversity; GIS; Historical heritage sites	Environmental protection; Geographic information systems; Regional planning; Sustainable development; Coastal zone management; Conservation values; Cultural resources; Economic sustainability; Future perspectives; Geodiversity; Historical heritages; Protected areas; Conservation; coastal zone management; conservation status; ecotourism; European Union; future prospect; geodiversity; GIS; heritage…	Scopus
170	Stefanovski S., Grk J., Hočevar G.	Quantitative model for geodiversity evaluation based on element diversity and density in the study area of contact karst between Kočevska reka and kostel [Kvantitativni model vrednotenja geodiverzitete na podlagi raznolikosti in gostote elementov geodiverzitete na primeru kontaktnega krasa med kočevsko reko ter kostelom]	Slovenia		geodiversity evaluation	14.7833049	45.5899949	2020	Dela	2020	54		75	103	10.4312/dela.54.75-103	The article presents a new objective systematic approach for geodiversity evaluation in the study area between Kočevska Reka and Kostel. The method is based on spatial diversity and density of geodiversity elements while terrain ruggedness is also taken into account. It was used on a contact karst area, where geodiversity hotspots were identified. The method was evaluated as appropriate for geodi…	Digital elevation model; Dina-ric karst; Geomorphology; GIS; Karst; Nature conservation	geodiversity; karst hydrology; quantitative analysis; roughness; species diversity; terrain	Scopus
171	Stepišnik U., Ilc Klun M., Repe B.	Assessment of educational potential of geodiversity on example of cerknica polje, Slovenia [Vrednotenje izobraŽevalnega potenciala geodiverzitete na primeru cerkniŠkega polja]	Slovenia		education	14.3581134	45.7488004	2017	Dela	2017	47		5	21	10.4312/dela.47.1.5-39	The concept of geodiversity has been present for more than 20 years. The majority of methods for valuing geodiversity is applied for evaluation of geoconservation or geotouristic potential. There is a deficiency of methods that could be used for evaluation of geodiversity and its educational potential. The aim of the paper is to propose a new method for valuing geodiversity for determining the ed…	Cerknica polje; Education; Excursion; Geodiversity; Nature protection	education; environmental protection; geodiversity; geotourism; nature conservation; planning method; teaching; Slovenia	Scopus
172	Stepišnik U., Repe B.	Identification of geodiversity hotspots on example of the rakov Škocjan landscape park [Identifikacija vročih točk geodiverzitete na primeru krajinskega parka rakov škocjan]	Slovenia		geodiversity evaluation	13.9626524	45.6767702	2015	Dela	2015	44		45	62	10.4312/dela.44.3.45-62	Regardless of numerous methods of geodiversity evaluation, subjective criteria-based methods prevail what reflects in the quality and comparability of data. The purpose of this article is to present the application of geodiversity evaluation method, which is largely stripped of subjective factors. The method we used to calculate the geodiversity index is based solely on surface ruggedness and spa…	Geodiversity; Geography; Geomorphological heritage; Geomorphology; Nature conservation; Rakov Škocjan; Slovenia	biodiversity; diversity index; environmental monitoring; geodiversity; geomorphology; heritage conservation; nature conservation; nature reserve; regional geography; spatial distribution; valley; national park; Bela Krajina; Slovenia	Scopus
173	Stepišnik U., Trenchovska A.	A New Quantitative Model for Comprehensive Geodiversity Evaluation: the Škocjan Caves Regional Park, Slovenia	Slovenia		geodiversity evaluation	13.984625	45.6671741	2018	Geoheritage	10	1		39	48	10.1007/s12371-017-0216-5	The article presents a simple quantitative model for geodiversity evaluation, which merges spatial relationship of geodiversity elements with terrain data. The model is partially automated in geographic information system tools to eliminate the majority of subjectivity in evaluation. As a result, it can be used for different environment types and is applicable for comparative studies. The method …	Block statistics; Geodiversity; Geodiversity hotspot; Karst; Mapping	comparative study; field method; geodiversity; geological mapping; geotourism; GIS; karst; numerical model; remote sensing; statistical analysis; terrain; Skocjanske jame; Slovenia	Scopus
174	Stepišnik U., Trenchovska A.	A proposal of quantitative geodiversity evaluation model on the example of Upper Pivka karst, Slovenia	Slovenia		geodiversity evaluation	14.2111489	45.6798616	2016	Dela	2016	46		53	65	10.4312/dela.46.2.41-65	The article presents a new method for geodiversity evaluation, which was evaluated in the Upper Pivka karst area. The method is based on entire area evaluation on the basis of spatial distribution of geodiversity elements and terrain ruggedness. The method was developed for the purpose of objective and systematic geodiversity evaluation on various sites. In this article, we applied the method in …	Geodiversity; Geomorphology; GIS; Karst; Nature protection; Slovenia; Upper Pivka	conservation management; geodiversity; geomorphology; GIS; karst; national park; nature conservation; spatial distribution; terrain; Pivka Basin; Slovenia; United States; Yellowstone National Park	Scopus
175	Stojanovic, V; Mijovic, D	EVALUATION OF GEODIVERSITY OF THE WESTERN BACKA DANUBE REGION IN THE PLANNING DOCUMENTS AND OPPORTUNITIES FOR IMPROVEMENT	Serbia		geodiversity evaluation	19.3304873	45.2726285	2008	JOURNAL OF THE GEOGRAPHICAL INSTITUTE JOVAN CVIJIC SASA	58			5	16		In the contemporary concept of nature preservation, the preservation of geodiversity slowly becomes normative, although geodiversity is still considered as a geotope in the function of biotope. Because of that it was analyzed geodiversity in the protected areas and the areas earmarked for protection in the Western Backa Danube Region, in refer to five municipalities along the Danube (Sombor, Apat…	geodiversity; geoheritage; land planning; conservation; Backa		Web of Science
176	Stojilković B.	Methodological problems of evaluating geodiversity: The case study of the logar valley landscape park [Metodološki Problemi Vrednotenja Geodiverzitete: Primer Krajinskega Parka Logarska Dolina]	Slovenia		geodiversity evaluation	14.6355019	46.391364	2019	Dela	2019	51		51	72	10.4312/dela.51.51-72	The article discusses the methodological perspectives of geodiversity evaluation with the case study of the Logar Valley Landscape Park. We present and compare two partially automatized evaluation methods: The first merges spatial relation of the number of the geomorphological and the hidrological geodiversity elements with terrain ruggedness data, whereas the second includes the lithological ele…	Diversity mapping; Geodiversity; Geomorphological mapping; Geomorphology; Methodology; Slovenia; The Kamnik-Savinja Alps; The Logar Valley	geodiversity; geomorphological mapping; geomorphology; landscape change; lithology; methodology; terrain; Afghanistan; Kamnik Alps; Lowgar; Slovenia	Scopus
177	Stojilković B.	Towards Transferable Use of Terrain Ruggedness Component in the Geodiversity Index	Slovenia		geodiversity evaluation	14.2049954	45.7852366	2022	Resources	11	2	22			10.3390/resources11020022	Geodiversity, as diversity of the abiotic environment, includes terrain ruggedness (or roughness), which is one of the essential parts of geodiversity evaluation. The terrain ruggedness index (R) represents the value of one of the main geodiversity components. The purpose of the study is to discuss the characteristics of R in the scope of geodiversity, and to show how R differs within two specifi…	Abiotic environment; Geodiversity; GIS; Mapping; Quantitative assessment; Relief diversity; Slovenia; Terrain ruggedness; The Logar Valley; The Postojna Cave System		Scopus
178	Sumatokhina, IM	Mining Industry territories and objects of Dnipropetrovsk region as geotourist attractions	Ukraine		geotourism	34.9619043	48.3905186	2016	JOURNAL OF GEOLOGY GEOGRAPHY AND GEOECOLOGY	24	1		133	138	10.15421/111620	The analysis of natural and androgenic geneses resources for development geotourizm was performed within the industrial and technologically loaded region - Dnipropetrovsk region. The regional catalog of mining areas and objects as promising geotourizm industrial area attractions was done. The analysis of spatial distribution geotourist objects. Proven capabilities qualitative improvement and quan…	geotourizm; mining areas; geotourist attractions; geotourist destinations		Web of Science
179	Sygar S., Zgłobicki W.	Geoheritage Resources in Polish Landscape Parks as a Basis for Developing a Network of Geoparks	Poland	no	geoparks	18.6862568	52.1303828	2022	Land	11	12	2277			10.3390/land11122277	Despite intensive scientific research on geodiversity and geotourism, the development of a network of geoparks in Poland has been slow. There are only two geoparks here. The reasons include difficulties of an organisational nature. The existing network of spatial forms of nature conservation should be used to streamline the process of establishing geoparks. The areas of the potential geoparks par…	geoeducation; geosites; geotourism; nature protection; Poland		Scopus
180	Szadkowska K., Szadkowski M., Tarka R.	Inventory and Assessment of the Geoheritage of the Sudetic Foreland Geopark (South-Western Poland)	Poland		geoheritage	16.752663	50.7888492	2022	Geoheritage	14	1	24			10.1007/s12371-022-00656-1	This paper presents an inventory and quantitative assessment of the scientific value (SV) and the degradation risk (DR) of the most important geosites of the Sudetic Foreland Geopark (South-Western Poland). It is an area with an exceedingly interesting and complex geological structure. In the Geopark’s rocks, 600 million years of history have been recorded: from magmatism on the active margin of …	Fore-Sudetic Block; Geodiversity; Geoheritage; Geosites; Geotourism; Geotouristic valorization	archaeology; assessment method; geodiversity; geological structure; geomorphological response; geomorphology; Holocene; nature conservation; quarry	Scopus
181	Szepesi J., Ésik Z., Soós I., Németh B., Sütő L., Novák T.J., Harangi S., Lukács R.	Identification of Geoheritage Elements in a Cultural Landscape: a Case Study from Tokaj Mts, Hungary	Hungary		cultural heritage and geodiversity	21.370086	48.1576536	2020	Geoheritage	12	4	89			10.1007/s12371-020-00516-w	Cultural landscapes were developed as a result of continuous interaction between nature and human culture. During their evolution, the geodiversity was also considerably influenced by human activities. Recently, geoheritage studies have become more sensitive towards man-made cultural landmarks. In this paper, we explore a methodology to compile a regional inventory for a historic mountainous cult…	Cultural landscape; Geocultural; Geosite; Geotourism; Volcanic geoheritage	conservation management; cultural heritage; cultural landscape; database; geodiversity; GIS; human activity; identification method; management practice; nature-society relations; Hungary; Tokaj Mountains; Tokaj-Eperjes Mountains	Scopus
182	Szepesi J., Ésik Z., Soós I., Novák T., Sütő L., Rózsa P., Lukács R., Harangi S.	Methodological review of geosite inventory and assessment work in the light of protection, sustainability and the development of geotourism [Földtani objektumok értékminősítése: Módszertani értékelés a védelem, bemutatás, fenntarthatóság és a geoturisztikai fejlesztések tükrében]	Hungary		sustainability	19.8889805	48.1045075	2018	Foldtani Kozlony	148	2		143	160	10.23928/foldt.kozl.2018.148.2.143	The concept of geodiversity involving abiotic elements of the environment arose as a scientific topic in the last decade of the 20th century. The increasing number of geological exhibition sites and the public interest in the two domestic UNESCO Global Geoparks in Hungary (Novohrad-Nógrád, Bakony-Balaton) indicated that geodiversity-based geo - tourism had become a development tool for disadvanta…	Assessment; Geoheritage; Geopark; Geosite; Inventory		Scopus
183	Szepesi J., Harangi S., Ésik Z., Novák T.J., Lukács R., Soós I.	Volcanic Geoheritage and Geotourism Perspectives in Hungary: a Case of an UNESCO World Heritage Site, Tokaj Wine Region Historic Cultural Landscape, Hungary	Hungary		geotourism	21.3821023	48.117444	2017	Geoheritage	9	3		329	349	10.1007/s12371-016-0205-0	In protected areas (e.g. geoparks, UNESCO sites), the identification of the different aspects of geoheritage site values is part of a holistic concept of protection, education and sustainable development. In the past years, significant progress has been achieved in the volcano tourism in Hungary as shown by the acceptance of two geoparks as members of Global Geoparks Network. They are the Bakony–…	Geosite inventory and assessment; Geotourism; Thematic route; UNESCO cultural heritage; Volcanic geoheritage	assessment method; cultural heritage; cultural landscape; geodiversity; geotourism; human activity; land use; protected area; sustainable development; tourism market; UNESCO; World Heritage Site; Hungary	Scopus
184	Świerkosz K., Koźma J., Reczyńska K., Halama M.	Muskau Arch Geopark in Poland (Central Europe)—Is it Possible to Integrate Geoconservation and Geoeducation into Biodiversity Conservation?	Poland		education	14.7194972	51.5598225	2017	Geoheritage	9	1		59	69	10.1007/s12371-016-0178-z	The Muskau Arch Geopark, situated on the Polish-German border, belongs to the UNESCO Global Geopark Network and is a model example that allows for the examination of the relationship between geo- and biodiversity as present in preservation, tourism, and management. In this area, there are 31 geotopes representing both natural geological processes as well as remnants of the cultural heritage assoc…	Educational attractiveness; Endangered species; Geotopes; Geotourism; Natura 2000; Natural habitats; UNESCO Global Geopark	amphibian; biodiversity; bird; cultural heritage; endangered species; environmental education; fungus; geodiversity; geotourism; integrated approach; lichen; mammal; reptile; spatial analysis; UNESCO; vascular plant; Germany; Poland [Central Europe]; Amphibia; Animalia; Aves; Fungi; Mammalia; Reptilia; Tracheophyta	Scopus
185	Telbisz T., Ćalić J., Kovačević-Majkić J., Milanović R., Brankov J., Micić J.	Karst Geoheritage of Tara National Park (Serbia) and Its Geotouristic Potential	Serbia		geoheritage	19.4575557	43.8483949	2021	Geoheritage	13	4	88			10.1007/s12371-021-00612-5	By the example of Tara National Park (NP), we present how the geoheritage can and should be presented in a NP where the primary role is played by biology. Tara NP has a rich geoheritage, especially its karst phenomena, which include gorges (e.g. the 1000-m-deep Drina Gorge), plateaus with dolines, dry valleys, and uvalas as well as springs and travertines. In addition, ophiolites also enrich the …	Doline; Drina River; Gorge; Ophiolite; Questionnaire survey	anthropogenic effect; geotourism; karst; neighborhood; spatiotemporal analysis; Serbia; Tara National Park	Scopus
186	Tessema, GA; Poesen, J; Verstraeten, G; Van Rompaey, A; van der Borg, J	The Scenic Beauty of Geosites and Its Relation to Their Scientific Value and Geoscience Knowledge of Tourists: A Case Study from Southeastern Spain	Spain		geosites	-2.1869134	36.7797146	2021	LAND	10	5	460			10.3390/land10050460	Scenic beauty is one of the most-commonly used indicators in the inventory and assessment of geosites for geoconservation, geoheritage management and geotourism development. It is an important driver of tourists to visit natural areas and it also provides support for the protection of natural heritage. Previous studies on scenic beauty mainly focused on landscape preference and physical character…	assessment; geo-interpretation; geosite value; geosite cluster; geotourism	CABO-DE-GATA; VISUAL LANDSCAPE PREFERENCES; AESTHETIC QUALITY; LAND ABANDONMENT; VOLCANIC ZONE; SORBAS BASIN; GEOHERITAGE; GEODIVERSITY; APPRECIATION; INDICATORS	Web of Science
187	Tičar J., Komac B., Zorn M., Ferk M., Hrvatin M., Ciglič R.	From Urban Geodiversity to Geoheritage: The Case of Ljubljana (Slovenia)	Slovenia		geoheritage	14.4922737	46.0529383	2017	Quaestiones Geographicae	36	3		37	50	10.1515/quageo-2017-0023	The city of Ljubljana lies at the intersection of various geomorphological regions that have strongly influenced its spatial organization. Prehistoric settlements were built on marshland, a Roman town was built on the first river terrace of the Ljubljanica River, and in the Middle Ages a town was built in a strategic position between the Ljubljanica River and Castle Hill. The modern city absorbed…	geoheritage; geomorphology; Ljubljana; spatial growth; urbanization	geodiversity; geomorphology; heritage conservation; Middle Ages; prehistoric; river terrace; spatial analysis; urban development; urban morphology; urbanization; Ljubljanica River; Slovenia	Scopus
188	Tognetto, F; Perotti, L; Viani, C; Colombo, N; Giardino, M	Geomorphology and geosystem services of the Indren-Cimalegna area (Monte Rosa massif - Western Italian Alps)	Italy		geomorphological mapping	7.8731185	45.9051281	2021	JOURNAL OF MAPS	17	2		161	172	10.1080/17445647.2021.1898484	New strategies for preservation of geodiversity and geosystem services need to be developed for mountain areas that are vulnerable to climate change and human activities. Detailed geomorphological surveys and geosystem services analyses have been carried out in the Indren-Cimalegna area, southern slope of Monte Rosa (Western Italian Alps). From remote sensing analysis and field inventories, a geo…	Geomorphological mapping; geosystem services; glacial environment; periglacial environment; Long-Term Ecological Research; Western Italian Alps		Web of Science
189	Toma C., Seghedi A., Popa R.-G.	Salt is the Seed of Life: a Geotourism Potential Analysis of Salt Areas in Buzău Land, Romania	Romania		geotourism	26.8361663	45.0829902	2022	Geoheritage	14	1	2			10.1007/s12371-021-00639-8	Geosites are essential elements of Geoparks, which can be used to transform geoheritage into sustainable economic, educational and social resources. One of the challenges we are generally facing today is in using these sites to their maximum potential, while ensuring their proper protection. In our experience, doing so successfully implies on one hand correctly evaluating their values, both from …	Diapir; Geosite; Geotrail; Salt karst; Salt Spring; Tourism		Scopus
190	Tomić N., Marković S.B., Antić A., Tešić D.	Exploring the potential for geotourism development in the Danube region of Serbia	Serbia		geotourism	20.2333831	45.1217632	2020	International Journal of Geoheritage and Parks	8	2		123	139	10.1016/j.ijgeop.2020.05.001	The very turbulent geological past of the Danube region in Serbia, coupled with the influence of the Danube River, has created a rich and complex geodiversity. However, the geotourism potential of this region still remains fully undiscovered. In this paper we proposed an inventory of geosites in the Danube region of Serbia and analyzed them in order to reveal which among them possess the greatest…	Danube; Geotourism; Modified Geosite Assessment Model (M-GAM); Serbia	assessment method; geotourism; inventory; site investigation; tourism development; tourist destination; Danube River; Serbia	Scopus
191	Trenčovska A.	Geomatics and gis based system for geodiversity inventory and evaluation applied in kratovo	North Macedonia		geodiversity evaluation	22.1833385	42.0827563	2020	Geologica Macedonica	34	1		51	66		The paper presents geomatics – GIS based system for inventory and evaluation of geodiversity. It is composed in a simple way including three phases with various methods used in a specified order. In accordance with this it is objective, repeatable and applicable at different landscapes and different surface size areas. The system was applied in the Kratovo area which is located within the largest…	Geodiversity; Geomatics; GIS; Kratovo; Quantitative method; Republic of North Macedonia		Scopus
192	Tukiainen H., Alahuhta J., Field R., Ala-Hulkko T., Lampinen R., Hjort J.	Spatial relationship between biodiversity and geodiversity across a gradient of land-use intensity in high-latitude landscapes	Finland	no	biodiversity and geodiversity	26.4988577	65.5188195	2017	Landscape Ecology	32	5		1049	1063	10.1007/s10980-017-0508-9	Context: ‘Conserving Nature’s stage’ has been advanced as an important conservation principle because of known links between biodiversity and abiotic environmental diversity, especially in sensitive high-latitude environments and at the landscape scale. However these links have not been examined across gradients of human impact on the landscape. Objectives: To (1) analyze the relationships betwee…	Boreal; Hemeroby; Human impact; Species richness; Sub-Arctic; Variation partitioning	anthropogenic effect; biodiversity; boreal forest; geodiversity; land use; land use change; land use planning; latitudinal gradient; partitioning; pristine environment; regression analysis; spatial analysis; species richness; Finland; Tracheophyta	Scopus
193	Tukiainen H., Bailey J.J., Field R., Kangas K., Hjort J.	Combining geodiversity with climate and topography to account for threatened species richness	Finland	no	biodiversity and geodiversity	25.9495413	61.3613877	2017	Conservation Biology	31	2		364	375	10.1111/cobi.12799	Understanding threatened species diversity is important for long-term conservation planning. Geodiversity—the diversity of Earth surface materials, forms, and processes—may be a useful biodiversity surrogate for conservation and have conservation value itself. Geodiversity and species richness relationships have been demonstrated; establishing whether geodiversity relates to threatened species’ d…	biodiversidad; biodiversity; conservación del estado de la naturaleza; conserving nature's stage; geology; geología; geomorfología; geomorphology; heterogeneidad; heterogeneity; hidrología; hydrology	biodiversity; conservation planning; endangered species; geodiversity; geomorphology; species diversity; species richness; topography; Finland; bryophytes; Fungi; Mammalia; Mollusca; Tracheophyta; animal; biodiversity; endangered species; environmental protection; Finland; mammal; Animals; Biodiversity; Conservation of Natural Resources; Endangered Species; Finland; Mammals	Scopus
194	Vasiljevic, DA; Markovic, SB; Hose, TA; Smalley, I; Basarin, B; Lazic, L; Jovic, G	The Introduction to Geoconservation of loess-palaeosol sequences in the Vojvodina region: Significant geoheritage of Serbia	Serbia		geoconservation	19.8984895	45.2436495	2011	QUATERNARY INTERNATIONAL	240	1		108	116	10.1016/j.quaint.2010.07.008	Loess-palaeosol sequences represent important palaeoclimatic and palaeoenvironmental archives on land. Furthermore, loess deposits in the Vojvodina region (North Serbia) can be regarded as one of the most important European terrestrial records of climatic and environmental changes during the last million years which makes them valuable scientific resource. Unfortunately, these sites are endangere…		UPPER PLEISTOCENE; LOESS/PALAEOSOL SEQUENCE; CENTRAL-EUROPE; RECORD; CLIMATE; STRATIGRAPHY; GEODIVERSITY; BRICKYARD; SECTION; SURDUK	Web of Science
195	Vereb V., van Wyk De Vries B., Guilbaud M.-N., Karátson D.	The urban geoheritage of Clermont-Ferrand: From inventory to management	France		geoheritage	3.096228	45.7705881	2020	Quaestiones Geographicae	39	3		5	31	10.2478/quageo-2020-0020	In sprawling urban areas, geoheritage is suppressed into limited niches. Potential geosites are highly vulnerable and could disappear completely during construction, or their integrity could be irreversibly modified. Here, we create an inventory of urban geoheritage for Clermont-Ferrand in France, recording more than 50 sites using the French national workflow. The results of the quantitative ass…	Clermont-Ferrand; France; Geoconservation; Geodiversity action plan; Geosite inventory; Urban geoheritage	geodiversity; geotourism; heritage conservation; quantitative analysis; tourism development; urban sprawl; vulnerability; Auvergne-Rhone-Alpes; Clermont-Ferrand; France; Puy de Dome [Auvergne-Rhone-Alpes]	Scopus
196	Weis R.	Geoheritage in the Minett UNESCO Biosphere (Southern Luxembourg): Inventory, Evaluation, and Conservation Aspects of Representative Geosites	Luxembourg		geoconservation	5.9508008	49.5298095	2022	Geoheritage	14	1	19			10.1007/s12371-022-00658-z	The southwestern part of Luxembourg, known as Minett in the local language use, exposes an exceptionally high diversity of marine near-shore sediment rocks from the Early to Middle Jurassic, owing to its proximal position at the north-eastern margins of the Paris Basin. The iconic Minette ironstone formation is known as the worldwide largest oolitic ironstone deposit from the last 500 my and the …	Geoheritage; Geomorphology; Minette; Southern Luxembourg; UNESCO Man and the Biosphere programme	biosphere; fossil record; geodiversity; invertebrate; ironstone; Jurassic; marine environment; UNESCO; France; Germany; Paris Basin	Scopus
197	Wolniewicz P.	Beyond Geodiversity Sites: Exploring the Educational Potential of Widespread Geological Features (Rocks, Minerals and Fossils)	Poland	no	education	19.1056605	52.2014307	2021	Geoheritage	13	2	34			10.1007/s12371-021-00557-9	Geosite and geodiversity site inventories are among the most important means of geological diversity conservation and promotion. However, there are other in situ geological features that have significant educational potential and are not included in many inventories, namely, localities of widespread rock types, common minerals and fossil-bearing strata. In this paper, a broad utilisation of these…	Geo-education; Geodiversity elements; Geodiversity evaluation; Scientific communication	assessment method; communication; data acquisition; education; fossil record; geodiversity; inventory; mineralogy; paleontology; petrography; sampling; tourist destination	Scopus
198	Zacharová J., Riezner J., Elznicová J., Machová I., Kubát K., Holcová D., Holec M., Pacina J., Štojdl J., Grygar T.M.	Historical Agricultural Landforms—Central European Bio-Cultural Heritage Worthy of Attention	Czechia		cultural heritage and geodiversity	14.2826624	50.534958	2022	Land	11	7	963			10.3390/land11070963	Knowledge about past agricultural land management can bring solutions for future needs. One undervalued historical type of historical rural landscape in temperate Europe is termed plužiny. It consists of individual historical agricultural landforms framed by linear woody vegetation. Our multidisciplinary research quantified the distribution of plužiny in Czechia, utilizing archive materials, geog…	agricultural stone walls; biodiversity; geodiversity; landscape memory; lynchet; plužiny		Scopus
199	Zafeiropoulos G., Drinia H., Antonarakou A., Zouros N.	From geoheritage to geoeducation, geoethics and geotourism: A critical evaluation of the Greek region	Greece		education	21.5556116	39.4475003	2021	Geosciences (Switzerland)	11	9	381			10.3390/geosciences11090381	The purpose of this review is, initially, to emphasize the importance of geoenvironmental education for the promotion and preservation of geological heritage and geoethical values, and based on these, to present the current situation in Greece. Geoeducation is a broader component of environmental education which aims to promote the geological heritage of a place and its geocon-servation. It is a …	Geoconservation; Geoeducation; Geoheritage; Geotourism; Greece; Sustainable development		Scopus
200	Zglobicki, W; Kukielka, S; Baran-Zglobicka, B	Regional Geotourist Resources-Assessment and Management (A Case Study in SE Poland)	Poland		geotourism	22.3466273	50.8568166	2020	RESOURCES-BASEL	9	2	18			10.3390/resources9020018	The appropriate identification of the geoheritage resources of a specific area is the sine qua non of the development of geotourism. The identification of tourists' perception of abiotic nature sites of high scientific value is also particularly important because it determines the possibility of using the potential of geosites. In the study, a detailed analysis was carried out of the assets of ge…	geoheritage; geopark; geosites; regional development	GEOHERITAGE; GEOCONSERVATION; HERITAGE; GEOPARK; GEODIVERSITY; CONSERVATION; PERSPECTIVES; GEOSITES; PURPOSES; GORGES	Web of Science
201	Zouros N.	Geomorphosite assessment and management in protected areas of greece case study of the lesvos island coastal geomorphosites [Evaluation et gestion des geomorphosites dans les zones protegees grecques. Le cas des geomorphosites cotiers de l’ile de Lesbos] [Bewertung und Management geo- Morphologischer Geotope in Naturschutzgebieten Griechenlands. Fallstudie der Insel Lesbos - Geomor- phologische G…	Greece		geomorphological mapping	26.325331	39.218775	2007	Geographica Helvetica	62	3		169	180	10.5194/gh-62-169-2007	Geomorphosite assessment and management in protected areas of Greece. Case study of the Lesvos island - coastal geomorphosites This paper presents a methodology for assessment of geomorphosites located in protected areas. The methodological process involves definition of «geo- morphological value» of all sites using six criteria: 1) «scientific» and “educational value»; 2) geodiversity; 3) «ecolo…			Scopus
202	Zwoliński Z., Stachowiak J.	Geodiversity map of the Tatra National Park for geotourism	Poland		geotourism	19.9986266	49.2838379	2012	Quaestiones Geographicae	31	1		99	107	10.2478/v10117-012-0012-x	The paper indicates the relations between geodiversity and geotourism in the Tatra National Park. Geodiversity of the Tatra Mountains is visualized by its geodiversity map, whereas geotouristic attractions are measured by touristic attractions along touristic trails on geodiversity map. Areas of the highest geodiversity cover merely 8.2% of the Tatar National Park area. These are mainly areas clo…	Geodiversity; Geotourism; Map algebra; Tatra Mountains; WLC	ecotourism; geodiversity; mapping; national park; slope; tourist attraction; valley; Carpathians; Slovakia; Tatra Mountains; Tatras National Park	Scopus
