# Supplementary material
Source: MDPI journal article supplement (https://www.mdpi.com/2079-9276/12/5/59)
Supplement: s1 [file s1 › Supplementary Material S3.xls]

## Sheet: Geoparks
Supplementary Material S3. List of UNESCO Global Geoparks (UGG) and the European Geoparks Network (EGN) geoparks located within the study area.
Name	State	X	Y
Erz der Alpen	Austria	13.2188864	47.4172124
Styrian Eisenwurzen	Austria	14.617324	47.692761
Karawanken/Karavanke	Austria, Slovenia	14.5933958	46.4871081
Famenne-Ardenne	Belgium	5.1875757	50.1260554
Papuk	Croatia	17.6204923	45.5271099
Vis Archipelago	Croatia	16.0918603	43.0456367
Czeski Raj	Czechia	15.1172222222222	50.5972222222222
Odsherred	Denmark	11.58	55.83
Rokua	Finland	26.5016666666667	64.5786111111111
Lauhanvuori-Hämeenkangas	Finland	22.1607145	62.140531
Beaujolais	France	4.5978572	46.046956
Causses du Quercy	France	1.68638888888889	44.5719444444444
Chablais	France	6.4775	46.3736111111111
Haute-Provence	France	6.28694444444444	44.1086111111111
Luberon	France	5.43555555555556	43.8752777777778
Massif des Bauges	France	6.10583333333333	45.6875
Monts d’Ardèche	France	4.25944444444444	44.635
Bergstraße-Odenwald	Germany	8.56861111111111	49.5363888888889
Harz, Braunschweiger Land	Germany	10.8325	52.2680555555556
Swabian Alb	Germany	9.40416666666667	48.5166666666667
TERRA.vita	Germany	8.05	52.2666666666667
Vulkaneifel	Germany	6.83611111111111	50.2066666666667
Muskauer Faltenbogen / Łuk Mużakowa	Germany, Poland	14.7263888888889	51.5702777777778
Chelmos Vouraikos	Greece	22.1716666666667	38.1463888888889
Lesvos Island	Greece	25.855	39.2116666666667
Psiloritis	Greece	24.8813888888889	35.2922222222222
Sitia	Greece	26.1166666666667	35.1669444444444
Vikos - Aoos, Grecja	Greece	20.7119444444444	40.0172222222222
Bakony–Balaton	Hungary	17.9286111111111	46.9763888888889
Novohrad-Nógrád	Slovakia, Hungary	19.8152777777778	48.1661111111111
Katla	Iceland	-19.6211111111111	63.6305555555556
Reykjanes	Iceland	-22.5166666666667	63.9730555555556
Cuilcagh Lakelands	Ireland, Great Britain	-7.51472222222222	54.2586111111111
Burren & Cliffs of Moher	Ireland	-9.38916666666667	52.9963888888889
Copper Coast	Ireland	-7.34222222222222	52.1386111111111
Adamello-Brenta	Italy	10.7522222222222	46.1191666666667
Alpi Apuani	Italy	10.3675	44.0411111111111
Beigua	Italy	8.5818875	44.3681499
Cilento, Vallo di Diano e Alburni	Italy	15.3725	40.2805555555556
Madonie	Italy	14.0788888888889	37.8666666666667
Pollino	Italy	16.1261111111111	39.9311111111111
Sesia Val Grande	Italy	8.34333333333333	45.9911111111111
Rocca di Cerere Geopark	Italy	14.2778441	37.5679457
Tuscan Mining Park	Italy	10.8422222222222	42.9547222222222
Hondsrug	Netherlands	6.82527777777778	52.9305555555556
Gea Norvegica	Norway	9.9975	59.1366666666667
Magma	Norway	6.05222222222222	58.4472222222222
Trollfjell	Norway	11.8632649	65.0503817
Açores	Portugal	-25.6755555555556	37.7411111111111
Arouca	Portugal	-8.245	40.9322222222222
Estrela Geopark	Portugal	-7.6138	40.3217858
Naturtejo da Meseta Meridional	Portugal	-7.49277777777778	39.8044444444444
Terras de Cavaleiros	Portugal	-6.97	41.54
Haţeg	Romania	23.3788888888889	45.6075
Idrija	Slovenia	14.0256197	45.9997241
Black Country	Great Britain	-2.0841124	52.5193482
English Riviera	Great Britain	-3.55416666666667	50.4561111111111
Fforest Fawr	Great Britain	-3.40583333333333	51.9308333333333
GeoMôn	Great Britain	-4.33416666666667	53.2688888888889
North Pennines AONB	Great Britain	-2.41694444444444	54.7880555555556
North-West Highlands	Great Britain	-5.25138888888889	58.1358333333333
Shetland	Great Britain	-1.09861111111111	60.56
Basque Coast	Spain	-2.35444444444444	43.2958333333333
Cabo de Gata-Níjar	Spain	-2.23722222222222	36.7894444444444
Central Catalonia	Spain	1.8262379	41.5886953
Origens	Spain	0.6602917	41.8312274
Courel	Spain	-7.4843734	42.8154788
Granada	Spain	-2.918528	37.4224026
Las Loras	Spain	-4.265934	42.7954807
Maestrazgo	Spain	-0.4561112	40.5261076
Molina & Alto Tajo	Spain	-1.8906574	40.842362
Sierra Norte de Sevilla	Spain	-5.63444444444444	37.7122222222222
Sierras Subbéticas	Spain	-4.3195413	37.229388
Sobrarbe-Pirineos	Spain	0.170277777777778	42.3686111111111
Villuercas Ibores Jara	Spain	-5.3275	39.4519444444445
Aspromonte	Italy	15.8876759	38.1499519
Grevena-Kozani	Greece	21.640969	40.2023952
Vestjylland	Denmark	8.4782427	56.4867714
Thuringia Inselsberg - Drei Gleichen	Germany	10.4152121	50.8467486
Saimaa	Finland	28.2488297	61.3094397
Majella	Italy	14.1009513	42.0870588
Holy Cross Mountains	Poland	20.5394237	50.8296603
Yangan-Tau,	Russia	58.1204167	55.2921652
Salpausselkä	Finland	25.6968376	61.0604387
Kefalonia-Ithaca	Greece	20.6175651	38.2199115
Mëllerdall	Luxembourg	6.3152671	49.7868129
Buzău Land	Romania	26.6851998	45.381253
Djerdap	Serbia	21.9750147	44.5386561
Platåbergens	Sweden	13.6679994	58.4431286
Ries	Germany	10.509684236505	48.8164339707954
